# Supplementary material for: Work outcomes of sickness absence related to mental disorders: a systematic literature review
Source: PubMed Central journal article supplement — BMJ Open. 2014 Jul 12;4(7):e005533. doi: 10.1136/bmjopen-2014-005533 (PMC4120435; doi:10.1136/bmjopen-2014-005533), 2014-07-12
Supplement: bmjopen-2014-005533.draft_revisions.pdf [file bmjopen-2014-005533.draft_revisions.pdf]

# BMJ Open

## Work Outcomes of Sickness Absence Related to Mental Disorders: A Systematic Literature Review

|                                 |                                                                                                                                                                                                                                                                                                                                                             |
|---------------------------------|-------------------------------------------------------------------------------------------------------------------------------------------------------------------------------------------------------------------------------------------------------------------------------------------------------------------------------------------------------------|
| Journal:                        | <i>BMJ Open</i>                                                                                                                                                                                                                                                                                                                                             |
| Manuscript ID:                  | bmjopen-2014-005533                                                                                                                                                                                                                                                                                                                                         |
| Article Type:                   | Research                                                                                                                                                                                                                                                                                                                                                    |
| Date Submitted by the Author:   | 23-Apr-2014                                                                                                                                                                                                                                                                                                                                                 |
| Complete List of Authors:       | Dewa, Carolyn; Centre for Research on Employment and Workplace Health, Centre for Addiction and Mental Health; University of Toronto, Department of Psychiatry<br>Loong, Desmond; Centre for Addiction and Mental Health, Centre for Research on Employment and Workplace Health<br>Bonato, Sarah; Centre for Addiction and Mental Health, Library Services |
| <b>Primary Subject Heading</b>: | Occupational and environmental medicine                                                                                                                                                                                                                                                                                                                     |
| Secondary Subject Heading:      | Health economics                                                                                                                                                                                                                                                                                                                                            |
| Keywords:                       | MENTAL HEALTH, OCCUPATIONAL & INDUSTRIAL MEDICINE, Health economics < HEALTH SERVICES ADMINISTRATION & MANAGEMENT                                                                                                                                                                                                                                           |
|                                 |                                                                                                                                                                                                                                                                                                                                                             |

SCHOLARONE™  
Manuscripts

1  
2  
3  
4  
5  
6  
7  
8  
9  
10  
11  
12  
13  
14  
15  
16  
17  
18  
19  
20  
21  
22  
23  
24  
25  
26  
27  
28  
29  
30  
31  
32  
33  
34  
35  
36  
37  
38  
39  
40  
41  
42  
43  
44  
45  
46  
47  
48  
49  
50  
51  
52  
53  
54  
55  
56  
57  
58  
59  
60

## Work Outcomes of Sickness Absence Related to Mental Disorders: A Systematic Literature Review

Carolyn S. Dewa<sup>1, 3§</sup>, Desmond Loong<sup>1</sup>, Sarah Bonato<sup>2</sup>

<sup>1</sup>Centre for Research on Employment and Workplace Health, Centre for Addiction and Mental Health, 33 Russell Street, Toronto, M5S 2S1, Canada

<sup>2</sup>Library Services, Centre for Addiction and Mental Health, 33 Russell Street, Toronto, M5S 2S1, Canada

<sup>3</sup>Department of Psychiatry, University of Toronto, 250 College Street, Toronto, M5T 1R8, Canada

Corresponding author:

Carolyn S. Dewa, MPH, PhD  
Head, Centre for Research on Employment and Workplace Health  
Centre for Addiction and Mental Health  
33 Russell St., Room 1000  
Toronto, Ontario M5S 2S1 Canada  
(416) 535-8501 x37033  
e-mail: carolyn.dewa@camh.ca

Keywords: mental disorders, work disability, return to work, sickness absence

Word count: 3976

Number of figures: 1

Number of tables: 3

Number of references: 26

Number of supplementary files: 3

1  
2  
3  
4  
5  
6  
7  
8  
9  
10  
11  
12  
13  
14  
15  
16  
17  
18  
19  
20  
21  
22  
23  
24  
25  
26  
27  
28  
29  
30  
31  
32  
33  
34  
35  
36  
37  
38  
39  
40  
41  
42  
43  
44  
45  
46  
47  
48  
49  
50  
51  
52  
53  
54  
55  
56  
57  
58  
59  
60

## Work Outcomes of Sickness Absence Related to Mental Disorders: A Systematic Literature Review

### Abstract

**Background.** Sickness absence is one of the most identifiable and costly types of losses related to mental disorders. Few cost of illness estimates specifically have taken sickness absences into account. To build the case for employers to invest in interventions that target sickness absences, it is important to identify the costs associated with them. The purpose of systematic literature review is to examine the current state of knowledge regarding the characteristics of sickness absences related to mental disorders that increase workplace burdens from the perspective of the employer.

**Methods.** A systematic literature search was performed using: *Medline Current*, *Medline In-process*, *PsycINFO*, *Econlit* and *Web of Science*. The search period covered 2002-2013. The systematic literature search focused on the sickness absence outcomes of workers with medically certified sickness absences related to mental disorders.

**Results.** A total of 3,820 unique citations were identified. Of these, 10 studies were identified whose quality ranged from good to excellent. The studies considered two characteristics of sickness absence: (1) whether and how long it took for a worker to return-to-work and (2) sickness absence recurrence. These studies suggest that these are two areas of workplace burden to employers.

**Conclusions.** The existing literature suggests that along with the incidence of sickness absence related to mental disorders, the length and recurrence (i.e., number and time between) of these sickness absences should be areas of concern. Thus, it may be important to evaluate interventions with respect to these two aspects of sickness absences.

## ARTICLE SUMMARY

## STRENGTHS AND LIMITATIONS OF THIS STUDY:

- Few studies have examined the current state of knowledge about sickness absence outcomes from the employer perspective; this paper examines the current state of knowledge regarding the characteristics of sickness absences related to mental disorders that increase workplace burdens from the perspective of the employer.
- This systematic literature review employed a broad search of five electronic databases: (1) *Medline Current*, (2) *Medline In-process*, (3) *PsycINFO*, (4) *Econlit* and (5) *Web of Science*. A hand search was also conducted. In total, 3,820 unique citations were identified and reviewed by two reviewers.
- All included studies were based on data from complete populations of people who had a sickness absence; this minimizes the potential for selection bias within populations.
- The results of this review suggest that along with the incidence of sickness absence related to mental disorders, the length and recurrence (i.e., frequency of recurrence and time between recurrence) of these sickness absences should be areas of concern. This highlights the importance of evaluating interventions with respect to these two aspects of sickness absences rather than focusing solely on whether a worker returns to work.
- The results of the search identified 10 papers that met inclusion criteria; this suggests that we are in the early stages of understanding the aspects of sickness absences that contribute to their burden and the areas to target to effectively decrease their costs.

1  
2  
3  
4  
5  
6  
7  
8  
9  
10  
11  
12  
13  
14  
15  
16  
17  
18  
19  
20  
21  
22  
23  
24  
25  
26  
27  
28  
29  
30  
31  
32  
33  
34  
35  
36  
37  
38  
39  
40  
41  
42  
43  
44  
45  
46  
47  
48  
49  
50  
51  
52  
53  
54  
55  
56  
57  
58  
59  
60

Around the world, there is anxiety about the economic costs of mental disorders. Estimates suggest that a large share of the burden of mental disorders can be attributed to losses in work productivity. Between 30% and 60% of depression's cost is related to losses associated with decreased work productivity<sup>1 2</sup>. Decreased work productivity has been measured as work absences or an unproductive work day.

Because they take a societal perspective, most of the economic burden estimates for mental disorders rely on survey data (e.g.,<sup>1 3 4</sup>). One of the most identifiable types of work absence is related to sickness absences. Few estimates specifically have taken sickness absences into account. Sickness absences are defined as work absences that require a medical certification and have an associated income replacement benefit. Yet, these specific types of absences are not only borne by society but employers in particular. Furthermore, because they involve the workplace, employers often assume the costs and responsibilities for the interventions to address sickness absences. Thus, to build the case for employers to invest in interventions that target sickness absences, it is important to identify the costs associated with sickness absences and where there can be cost-savings that interventions offer.

The concern among employers regarding mental disorders has been fueled by the recognition that sickness absence episodes related to a mental disorder are costly and their incidence is steadily rising<sup>5</sup>. Estimates suggest that an episode related to a mental disorder can be double the cost of one related to a physical disorder<sup>6</sup>. The total cost of sickness absences related to mental disorders is influenced by two factors: (1) the number of days absent and (2) the total number of sickness absences. The more sickness absence days, the greater the total cost of the sickness absence. In addition, high costs could be incurred with short sickness episodes if there are many repeat sickness episodes.

1  
2  
3 One approach to addressing the costs of sickness absence related to mental disorders  
4 could be to decrease the impact of these factors. This suggests that interest should extend  
5  
6 beyond whether a worker returns-to-work (RTW). Rather, it is also important to understand the  
7  
8 length and the frequency of sickness absence related to mental disorders. Few studies have  
9  
10 examined the current state of knowledge about sickness absence outcomes from the employer  
11  
12 perspective. To fill this gap, we conducted a systematic literature review to examine the sickness  
13  
14 absence outcomes reported in the literature. These outcomes could help to identify the aspects of  
15  
16 sickness absences that contribute to workplace burdens. Thus, for this review, outcomes were  
17  
18 used to describe the characteristics of sickness absences related to mental disorders that add to  
19  
20 workplace burdens. The purpose of this paper is to examine the current state of knowledge  
21  
22 regarding the characteristics of sickness absences related to mental disorders that increase  
23  
24 workplace burdens from the perspective of the employer. As such, this review is only a first step  
25  
26 in understanding the aspects of sickness absences related to mental disorders that could escalate  
27  
28 the costs that employers face. Results of this review can point to areas that sickness absence  
29  
30 interventions could target. They can also suggest dimensions along which future intervention  
31  
32 effectiveness could be evaluated as well as identify gaps in the literature.  
33  
34  
35  
36  
37  
38  
39

## 40 41 **METHODS**

42  
43 This systematic literature review used publically available peer-reviewed studies. It did  
44  
45 not collect or use primary data. As such, it was not subject to research ethics board review.  
46

47  
48 Five electronic databases were searched for this systematic literature review: (1) *Medline*  
49  
50 *Current* (an index of biomedical research and clinical sciences journal articles), (2) *Medline In-*  
51  
52 *process* (an index of biomedical research and clinical sciences journal articles awaiting indexing  
53  
54 into *Medline Current*), (3) *PsycINFO* (an index of journal articles, books, chapters, and  
55  
56 dissertations in psychology, social sciences, behavioral sciences, and health sciences), (4) *Econlit*  
57  
58  
59  
60

1  
2  
3 (an index of journal articles, books, working papers and dissertations in Economics) and (5) *Web*  
4  
5  
6 *of Science* (an index of journal articles, editorially selected books and conference proceedings  
7  
8 in life sciences and biomedical research). A search strategy was developed and executed for  
9  
10 each database with a professional health science librarian (SB) (Supplementary File 1 - Search  
11  
12 Strategy). *Medline Current*, *Medline In-process* and *PsychINFO* were searched using the *OID*  
13  
14 platform. *Econlit* and *Web of Science* were searched using the *ProQuest* and *Thomson Reuters*  
15  
16 search interface, respectively. The search was completed between February 2013 and March  
17  
18 2013 and was limited to English language journals published between 2002 and 2013.

### 21 22 **Eligibility Criteria**

23  
24 The systematic literature search focused on the characteristics of sickness absences of  
25  
26 workers with medically certified sickness absences related to mental disorders. Sickness absence  
27  
28 encompassed sick leave, short-term disability leave and long-term disability leave. These  
29  
30 sickness absence benefits could be either publicly or privately sponsored. Their receipt was  
31  
32 conditional on employment and the absence benefit was claimed with the intention of continued  
33  
34 employment. We included studies that looked at “no cause” sickness absences such that it was  
35  
36 not compulsory that the absence was work-related. The search focused on identifying articles  
37  
38 about working adults between 18-65 years old who had a sickness absence related to a mental  
39  
40 disorder. Sickness absence outcome terms (i.e., length of sickness absence, return to work, etc.)  
41  
42 were not included in the search strategy. This was done to ensure all reported sickness absence  
43  
44 outcomes in the literature would be captured. The reference lists of relevant studies were hand  
45  
46 searched. Intervention studies, review articles and commentaries were excluded.

47  
48 A multi-phase screening process was employed. The first phase involved screening titles.  
49  
50 Citations that passed the first phase were evaluated for relevance based on their abstracts.  
51  
52  
53  
54  
55  
56  
57  
58  
59  
60

1  
2  
3 Finally, those that passed the abstract screen were evaluated for content based on the full-text.  
4  
5 The multi-phase screening process was completed independently by two reviewers, CSD and  
6  
7 DL. The chance agreement corrected inter-rater reliability was 0.92. Articles for which there  
8  
9 were rater disagreements were discussed until consensus was reached.  
10  
11

12 The following eligibility criteria were used in each phase:

- 13 1. The study reported on medically certified sickness absences due to mental  
14 disorders.
- 15 2. The study sample is not from a select (i.e., clinical trial) population.
- 16 3. The study analyzed data that were collected in the year 2000 or later.
- 17 4. The study reported on sickness absence outcomes directly related to a  
18 specific absence.

19  
20 Sickness absence outcomes considered for this review included length of sickness  
21 absence, not returning to work (i.e., quitting, retiring), transitioning to long term disability,  
22 returning to work, and sickness absence recurrence.  
23  
24

25  
26 Because the 1990s was a period of global change in disability policies and accounting for  
27 publication lag, the year 2002 was used as an inclusion starting point<sup>7</sup>. We focused on the last  
28 decade because there were relatively fewer policy changes related to workers during this time.  
29  
30 Studies using pre-2000 data were excluded because pre-2000 data were collected within systems  
31 that existed before many of the 1990s policy changes.  
32  
33

### 34 **Quality Assessment**

35  
36 Articles that passed the three-stage screening process were then assessed for quality using  
37 the following criteria:  
38  
39

- 40 1. The study population is well described.
- 41 2. The data source is well described.
- 42 3. The study sample is representative of all workers in the context.



4. Mental disorders are included and reported.
5. The system of diagnosis/classification is described.
6. The sickness absence criteria are reported (i.e., pre-sickness absence days to qualify for sickness absence).
7. Sickness absence outcome measures are defined.
8. Analytical methods are described.
9. Uncertainty of estimates are reported.
10. The stated research objective is met.

One point was awarded for each criterion that was met; the maximum score was 10.

Total scores between 1 and 4 points were categorized as *fair/weak* quality, those between 5 and 8 points were *good* and those between 9 and 10 points were *excellent* quality.

## RESULTS

### Description of Inclusion and Exclusion

The electronic literature search resulted in the identification of 3,820 unique citations (Figure 1). From these, 24 entries that were commentaries were excluded. Based on the title review, 3,577 citations were excluded. Based on abstract review, another 151 citations were excluded; this left 64 articles for full-text review. After the full-text review, 10 articles remained and their reference lists were hand searched for relevant studies. Four articles were identified in the hand search process but all were excluded during full-text review. Reasons for article exclusions were because they: (1) used pre-2000 data (n = 11), (2) did not report sickness absence outcomes directly related to a specific absence (n = 3), (3) were based on select populations (n = 44).

-----  
Insert Figure 1  
-----

### Quality Assessment

1  
2  
3  
4  
5  
6  
7  
8  
9  
10  
11  
12  
13  
14  
15  
16  
17  
18  
19  
20  
21  
22  
23  
24  
25  
26  
27  
28  
29  
30  
31  
32  
33  
34  
35  
36  
37  
38  
39  
40  
41  
42  
43  
44  
45  
46  
47  
48  
49  
50  
51  
52  
53  
54  
55  
56  
57  
58  
59  
60

Upon quality assessment, 5 of the 10 studies were rated as *excellent* and the remaining 5 as *good* (Supplementary File 2 - Quality Assessment). The identified limitations of these studies included: non-representativeness of the working population (n = 10), outcome measure not defined (n = 4), and uncertainty of the estimate not reported (n = 3).

### Overview of the Studies

Table 1 contains the descriptions of the included studies. All of the included studies used administrative data from either an employer, insurer or occupational healthcare provider. As a result, none of the studies relied on self-report. They were based on objective data to identify populations of people with a sickness absence.

Of the 10 included studies, five were from the Netherlands. Two were from Brazil, two were from Canada and another from the UK. Seven of the studies used data from single employers. The employers in the studies represented a variety of sectors in several countries including a Dutch national postal service and a telecommunication company<sup>8-10</sup>, a Brazilian hospital<sup>11</sup>, a Canadian resource sector organization<sup>6 12</sup> and a British police force<sup>13</sup>. The four exceptions were Barbosa-Branco et al.<sup>14</sup> whose study included all Brazilian workers in registered private sector companies. In addition, Koopman et al.<sup>15</sup> and Roelen et al.<sup>16</sup> based their studies on data from an occupational health provider representing a broad spectrum of firms across the Netherlands.

All of the studies except one indicated that they used the International Classification of Diseases (ICD) to identify type of disorder. Of those that used the ICD, eight of the studies used the 10<sup>th</sup> edition; one used the 8<sup>th</sup> edition. One study<sup>15</sup> did not describe the disorder classification system that was used. However, because it used ArboNed data that were also used by Roelen et al.<sup>16</sup>, it might be assumed that ICD codes were also used in this study.

Among the studies, there was variability in the scope of the primary diagnoses associated with the sickness absences that were included. However, there were similarities with respect to the inclusion of depressive and anxiety disorders and stress-related disorders. Thus, there appeared to be consistency among the studies with regard to a core set of mental disorders.

There was variation with regard to the number of absence days needed to qualify for sickness absence benefits. The number of days ranged from one to three weeks.

**Table 1. Overview of Studies**

| Author(s)                    | Country | Study Population                                                                                                                                               | Data Source(s)                                                                                                                 | Years of Data | Diagnostic Classification System Used                                       | Sickness Absence Benefit Definition                                                                            | Outcomes                                                                  |
|------------------------------|---------|----------------------------------------------------------------------------------------------------------------------------------------------------------------|--------------------------------------------------------------------------------------------------------------------------------|---------------|-----------------------------------------------------------------------------|----------------------------------------------------------------------------------------------------------------|---------------------------------------------------------------------------|
| Barbosa-Branco et al. (2012) | BR      | All employees in registered private sector jobs in 2008 who a sickness absence                                                                                 | Brazilian National Social Security Administrative Databases: National Benefits System and National Social Information Database | 2008          | International Classification of Diseases, 10 <sup>th</sup> edition (ICD-10) | Sickness absence = $\geq 15$ medically certified consecutive days absent                                       | Duration of sickness benefit claim (calendar vs work days not specified)  |
| Board & Brown (2011)         | UK      | Study sample consisted of all employees of one police force who had $\geq 1$ episode of long-term sickness absence (LTSA) between Nov 1, 2000 and Oct 31, 2002 | Employer electronic absenteeism record administrative data                                                                     | 2000-2002     | International Classification of Diseases, 8 <sup>th</sup> edition (ICD-8)   | Long-term sickness absence = medically certified sickness absence episodes $\geq 28$ consecutive calendar days | Return to work by type of sickness absence episode (sub-acute or chronic) |
| Dewa et al. (2010)           | CA      | Employees from one large resource sector company from 2003-2006 who had a sickness absence                                                                     | Employer administrative sickness absence data                                                                                  | 2003-2006     | ICD-10                                                                      | Sickness absence = medically certified sickness absence of $\geq 5$ continuous work days                       | Mean work days per sickness absence episode                               |
| Dewa et al. (2011)           | CA      | Employees from one large resource sector company from 2003-2006 who had a sickness absence                                                                     | Employer administrative sickness absence data                                                                                  | 2003-2006     | ICD-10                                                                      | Sickness absence = medically certified sickness absence of $\geq 5$ continuous work days                       | Sickness absence free days                                                |

| Author(s)              | Country | Study Population                                                                                                                                             | Data Source(s)                                                                               | Years of Data | Diagnostic Classification System Used | Sickness Absence Benefit Definition                                                                             | Outcomes                                                                                                                                                                                                                                                          |
|------------------------|---------|--------------------------------------------------------------------------------------------------------------------------------------------------------------|----------------------------------------------------------------------------------------------|---------------|---------------------------------------|-----------------------------------------------------------------------------------------------------------------|-------------------------------------------------------------------------------------------------------------------------------------------------------------------------------------------------------------------------------------------------------------------|
| Koopmans et al. (2008) | NL      | Employees of firms who were clients of one occupational health services provider from April 2002 – November 2005 who had a sickness absence.                 | Administrative sickness absence data from one occupational health service provider (ArboNed) | 2002-2005     | Not described                         | Not described                                                                                                   | Return to work<br>Duration of absence calendar days                                                                                                                                                                                                               |
| Koopmans et al. (2010) | NL      | Dutch Post and Telecommunication employees from 2001-2007 who had a sickness absence due to a common mental disorder since Jan 1, 2001 or date of employment | Administrative sickness absence data from one occupational health service provider (ArboNed) | 2001-2007     | ICD-10                                | Sick leaves of > 3 weeks require a medical certificate from an occupational physician                           | Duration of sickness absence days (calendar vs work days not specified)<br>Days to sickness absence recurrence                                                                                                                                                    |
| Koopman et al. (2011)  | NL      | Dutch Post and Telecommunication employees from 2001-2007 who had a sickness absence due to a common mental disorder                                         | Administrative sickness absence data from one occupational health service provider (ArboNed) | 2001-2007     | ICD-10                                | Sick leaves of > 3 weeks require a medical certificate from an occupational physician                           | Duration of sickness episodes<br>Median duration in months until recurrence of sickness absence<br>Days to sickness absence recurrence<br>Recurrence = the start of at least one new episode of sickness absence after complete return to work for $\geq 28$ days |
| Reis et al. (2011)     | BR      | Workers who worked $\geq 20$ hours/week from one university hospital who were employed from 2000-2007 who had at least 1 sickness absence                    | Administrative data from employer human resources department                                 | 2000-2007     | ICD-10                                | Not described                                                                                                   | Median calendar days per sickness absence<br>Recurrence density of sickness absence episodes/100 worker-months                                                                                                                                                    |
| Roelen et al. (2009)   | NL      | Employees of firms who were clients of an occupational health services provider from 2001-2007 who had a sickness absence                                    | Administrative sickness absence data from one occupational health service provider (ArboNed) | 2001-2007     | ICD-10                                | Sickness absence: absence of $\geq 28$ sick days requiring a medical certificate from an occupational physician | Median number of calendar days of sickness absence episodes/100 employees                                                                                                                                                                                         |

| Author(s)            | Country | Study Population                                                                     | Data Source(s)                                                                               | Years of Data | Diagnostic Classification System Used | Sickness Absence Benefit Definition                                                    | Outcomes                                                                                                                                                   |
|----------------------|---------|--------------------------------------------------------------------------------------|----------------------------------------------------------------------------------------------|---------------|---------------------------------------|----------------------------------------------------------------------------------------|------------------------------------------------------------------------------------------------------------------------------------------------------------|
| Roelen et al. (2010) | NL      | Dutch Post and Telecommunication employees from 2001-2007 who had a sickness absence | Administrative sickness absence data from one occupational health service provider (ArboNed) | 2001-2007     | ICD-10                                | Sick leaves of > 3 weeks require a medical certificate from an occupational physician. | Median duration of sickness absence in days (type of day not specified)<br>Recurrence density of sickness absence/1,000 worker-years<br>Days to recurrence |

### Sickness Absence Outcomes

The outcomes reported by the studies could be grouped into two general categories. The first outcome category includes studies that examined whether and when a worker returned to work. They included RTW indicators and sickness absence duration. The second category of outcomes focused on sickness absence recurrence. These recurrence outcomes reflected the rates of recurrence as well as the time between sickness absence episodes.

Outcomes focusing on Return-to-Work. Three studies reported the rates of RTW (Table 2). Koopmans et al.<sup>15</sup> observed that of workers who had sickness absences due to depression, 66% returned to work within a year. Board and Brown<sup>13</sup> found that among their police force, 85% of police officers who had a sickness absence returned to work.

*Duration of sickness absence.* Duration of sickness absence was measured using three types of days – calendar days, work days and unspecified types of days. Sickness absence days were reported using two statistics – the mean days and the median days. The values of the mean and the median become equivalent when a distribution is symmetric (e.g., the normal distribution). From the Netherland studies, the median days of absence duration were between 79 and 119 days<sup>8-10 15 16</sup>. In addition, there were changes in the median number of days over time

such that they seemed to decrease between 2001 and 2007<sup>16</sup>. From Brazil, Reis et al.<sup>11</sup> reported a duration of 5-7 calendar days. Using Canadian data, Dewa et al.<sup>6</sup> reported a mean absence episode of 65 work days. From the UK, Board and Brown<sup>13</sup> found that 43-60% of the workers they observed had a sickness absence episode that was between 28-90 days; about 41-57% had sickness absence episodes that lasted more than 90 days.

**Table 2. Return-to-Work Sickness Absence Outcomes**

| Author(s)                    | Country      | Mental Disorders                                                                                                                                                                                                                                                                                | Outcome Measure                                                                                                                                    | Number of episodes or employees                                                                                  | Reported Outcomes of Sickness Absences                                                                                                                                                                                                                                            |
|------------------------------|--------------|-------------------------------------------------------------------------------------------------------------------------------------------------------------------------------------------------------------------------------------------------------------------------------------------------|----------------------------------------------------------------------------------------------------------------------------------------------------|------------------------------------------------------------------------------------------------------------------|-----------------------------------------------------------------------------------------------------------------------------------------------------------------------------------------------------------------------------------------------------------------------------------|
| Barbosa-Branco et al. (2012) | BR           | Mental and behavioural disorders: Organic disorders (ICD-10 F00-F09); psychoaffective substance use disorders (ICD-10 F10-F19); schizophrenia, schizotypal and delusional disorders (ICD-10 F20-F29); mood disorders (ICD-10 F30-F39); stress-related and somatoform disorders (ICD-10 F40-F48) | Duration of sickness benefit claim = measure not described                                                                                         | Number of claims due to mental and behavioural disorders:<br>All = 147,105<br>Males = 71,195<br>Females = 75,910 | Median duration of disability episodes (in days) (1 <sup>st</sup> and 3 <sup>rd</sup> quartiles):<br>Males:<br>Mental and behavioural disorders = 76 (47, 113)<br>Females:<br>Mental and behavioural disorders = 65 (43, 97)                                                      |
| Board and Brown (2011)       | UK           | ICD categories used not described                                                                                                                                                                                                                                                               | Absence phase:<br>Sub-acute = 28-90 days<br>Chronic phase = > 90 days<br>Return-to-Work = episode has start and finish dates before study end date | Number of sickness absences:<br>Police officers = 4,485<br>Civilian staff = 1,761                                | Among those with mental ill health:<br>Police officers:<br>With sub-acute episode = 43.2%<br>With chronic episode = 56.8%<br>Who return to work = 85.2%<br>Civilian staff:<br>With sub-acute episode = 59.5%<br>With chronic episode = 40.5%<br>Who return to work = Not reported |
| Dewa et al. (2010)           | CA (Ontario) | Mental and behavioural disorders (ICD-10 F00-F99, Z502, Z503, Z561-Z566, Z630-Z639, Z729, Z733, Z738, Z864, Z915): schizophrenia, mood disorders, stress-related disorders and mental and behavioral disorders due to psychoactive substance use                                                | Duration of episode = number of work days absent                                                                                                   | Number of sickness absences:<br>Due to any disorder = 4,791<br>Due to mental and behavioural disorders = 698     | Mean days per episode (in days) (95% Confidence Interval):<br>Due to any disorder = 33.0 (31.3, 34.7)<br>Due to mental and behavioural disorders:<br>All = 64.9 (58.2, 71.6)<br>Males = 62.1 (54.1, 70.1)<br>Females = 70.0 (57.8, 82.1)                                          |

| Author(s)              | Country | Mental Disorders                                                                                                                                                                                                                                                          | Outcome Measure                                                                                                                                  | Number of episodes or employees                                                                                                                      | Reported Outcomes of Sickness Absences                                                                                                                                                                                                                                                                                                                                                                                                                                                                                                                                                                   |
|------------------------|---------|---------------------------------------------------------------------------------------------------------------------------------------------------------------------------------------------------------------------------------------------------------------------------|--------------------------------------------------------------------------------------------------------------------------------------------------|------------------------------------------------------------------------------------------------------------------------------------------------------|----------------------------------------------------------------------------------------------------------------------------------------------------------------------------------------------------------------------------------------------------------------------------------------------------------------------------------------------------------------------------------------------------------------------------------------------------------------------------------------------------------------------------------------------------------------------------------------------------------|
| Koopmans et al. (2008) | NL      | Depression (Diagnostic classification system not described in paper)                                                                                                                                                                                                      | Duration of episode = number of calendar days between first day of sick leave and date of return to work or disability pension received          | Number of new episodes due to depression = 9,910                                                                                                     | <p>Return to work within a year:<br/>Men = 67.7%<br/>Women = 64.8%<br/>Total = 66.2%</p> <p>One year of work incapacity:<br/>Men = 15.2%<br/>Women = 17.4%<br/>Total = 16.4%</p> <p>Mean duration of episode (in days) (95% CI):<br/>Men = 200 (196, 204)<br/>Women = 213 (210, 217)</p> <p>Median duration of episode (in days) (95% CI):<br/>Men = 179 (172, 186)<br/>Women = 201 (193, 209)</p>                                                                                                                                                                                                       |
| Koopmans et al. (2010) | NL      | Common mental disorders (CMD) from medical certification: stress-related (distress and adjustment disorders) (ICD-10 R45, F43) and psychiatric (mild to moderate depressive and anxiety disorders) (ICD-10 F32.0, F32.1, F40.0, F40.1, F40.2, F41.0, F41.1, F41.2, F41.3) | Duration of sickness absence = number of calendar days between first day of sick leave and date of return to work or disability pension received | <p>Number of employees with <math>\geq 1</math> sickness absence due to CMD = 8,951</p> <p>Total number of sickness absence due to CMD = 10,921</p>  | <p>From 2001-2007, median duration of index sickness absence episode (in days) (95% CI):</p> <p>Men:<br/>Stress = 49 (47, 51)<br/>Psychiatric = 168 (150, 186)<br/>Total CMD = 57 (54, 60)</p> <p>Women:<br/>Stress = 56 (53, 59)<br/>Psychiatric = 168 (151, 185)<br/>Total CMD = 67 (63, 71)</p> <p>From 2001-2007, median duration of recurrent CMD sickness absence episodes (in days) (95% CI):</p> <p>Men:<br/>Stress = 46 (41, 51)<br/>Psychiatric = 68 (39, 97)<br/>Total CMD = 48 (43, 53)</p> <p>Women:<br/>Stress = 60 (51, 69)<br/>Psychiatric = 73 (53, 93)<br/>Total CMD = 62 (55, 69)</p> |
| Koopmans et al. (2011) | NL      | Common mental disorders (CMD) from medical certification: stress-related (distress and adjustment disorders) (ICD-10 R45, F43) and psychiatric (mild to moderate depressive and anxiety disorders) (ICD-10 F32, F40, F41)                                                 | Duration of sickness absence = number of calendar days of sickness absence adjusted for partial return to work and annual worker-years           | <p>Number of employees with <math>\geq 1</math> sickness absence due to CMD = 9,904</p> <p>Total number of sickness absences due to CMD = 12,404</p> | <p>From 2001-07, duration of sickness absence episode due to CMD (in calendar days) (95% CI):</p> <p>Total = 62 (60, 64)<br/>Men = 57 (55, 59)<br/>Women = 68 (65, 71)</p>                                                                                                                                                                                                                                                                                                                                                                                                                               |

| Author(s)            | Country | Mental Disorders                                                                                                                                                                            | Outcome Measure                                                                                                                         | Number of episodes or employees                                                                                                                                                                                                                                                                                                                             | Reported Outcomes of Sickness Absences                                                                                                                                                                                                                                                                                                                                                                                                                       |
|----------------------|---------|---------------------------------------------------------------------------------------------------------------------------------------------------------------------------------------------|-----------------------------------------------------------------------------------------------------------------------------------------|-------------------------------------------------------------------------------------------------------------------------------------------------------------------------------------------------------------------------------------------------------------------------------------------------------------------------------------------------------------|--------------------------------------------------------------------------------------------------------------------------------------------------------------------------------------------------------------------------------------------------------------------------------------------------------------------------------------------------------------------------------------------------------------------------------------------------------------|
| Reis et al. (2011)   | BR      | Mental and behavioral disorders (ICD-10 F00-F99)                                                                                                                                            | Duration of episode = Number of calendar days absent from work                                                                          | Number of sickness absence episodes:<br>Due to any disorder = 5,138<br>Due to mental and behavioural disorders = 324                                                                                                                                                                                                                                        | Median duration of sickness absence leave (in days):<br>First episode:<br>Due to any disorder = 2<br>Due to mental and behavioural disorders = 5<br>Recurrent episodes:<br>Due to any disorder = 2<br>Due to mental and behavioural disorders = 7                                                                                                                                                                                                            |
| Roelen et al. (2009) | NL      | Mental and behavioral disorders (ICD-10 R45, F43, F32, F40 and F41) from medical certification: emotional disturbance, depressive disorders, anxiety disorders and stress-related disorders | Duration of sickness absence = calendar days between the first and last day of sickness absence                                         | Number of sickness absence episodes:<br>Due to any disorder:<br>2001 = 90,095<br>2002 = 104,193<br>2003 = 118,926<br>2004 = 129,024<br>2005 = 128,044<br>2006 = 108,901<br>2007 = 96,482<br>Due to mental and behavioural disorders:<br>2001 = 21,140<br>2002 = 22,803<br>2003 = 24,917<br>2004 = 27,533<br>2005 = 22,682<br>2006 = 20,013<br>2007 = 18,513 | Median duration of sickness absence episodes (in days) (95% CI):<br>Due to any disorder:<br>2001 = 73 (72, 74)<br>2002 = 63 (62, 64)<br>2003 = 57 (56, 58)<br>2004 = 53 (53, 53)<br>2005 = 45 (45, 45)<br>2006 = 49 (48, 50)<br>2007 = 55 (54, 56)<br>Due to mental and behavioural disorders:<br>2001 = 119 (116, 122)<br>2002 = 98 (96, 100)<br>2003 = 87 (85, 89)<br>2004 = 80 (79, 81)<br>2005 = 79 (77, 81)<br>2006 = 83 (81, 85)<br>2007 = 87 (85, 89) |
| Roelen et al. (2010) | NL      | Mental and behavioral disorders (ICD-10 F00-F99) from medical certification                                                                                                                 | Duration of sickness absence = number of days between first day of sick leave and date of return to work or disability pension received | Number of employees with $\geq 1$ sickness absence = 36,342<br>Number of employees with $\geq 1$ sickness absence due to mental and behavioural disorders = 7,197<br>Number of employees with $> 1$ sickness absence due to mental and behavioural disorders = 1,400<br>Worker-years = 363,461                                                              | Median duration of sickness absence (in days) (95% CI):<br>Mental and behavioural disorders = 62 (55, 69)<br>Any disorder = 35 (34, 36)                                                                                                                                                                                                                                                                                                                      |

Four of the studies compared sickness absence episode duration for those related to



mental disorders versus those for other disorders. The findings among the four studies were consistent; episodes for mental disorders were longer than episodes related to other types of disorders. For instance, Roelen et al.<sup>10</sup> reported that while the median duration of a mental disorder related episode was 62 days, it was 35 days for any type of episode. In addition, this pattern appeared to be consistent from 2001 to 2007<sup>16</sup>. Among their Canadian energy sector workers, Dewa et al.<sup>6</sup> found that the mean number of work days of an episode related to a mental disorder was almost double that of an episode related to other types of disorders (65 days versus 33 days). Reis et al.<sup>11</sup> reported similar patterns among their sample of Brazilian healthcare workers.

Outcomes Focusing on Sickness Absence Recurrence. Three of the studies reported rates of sickness absence recurrence related to a mental disorder (Table 3). Roelen et al.<sup>10</sup> reported recurrence rates of 80/1000 worker-years for mental and behavioural disorders as opposed to 82/1000 worker-years for any disorder. Reis et al.<sup>11</sup> found rates of 7/100 worker-months for mental and behavioural disorders and 17/100 worker-months for any disorder. In addition, Koopmans et al.<sup>9</sup> observed mental disorder sickness absence recurrence rates of 76/1000 worker-years for men and 79/1000 worker-years for women. They also found that 18% of workers with at least one sickness absence episode had a recurrent episode<sup>9</sup>.

**Table 3. Recurrence Sickness Absence Outcomes**

| Author(s)          | Country      | Mental Disorders                                                                                                                                                                                                                                 | Outcome Measure                                                                                   | Number of episodes or employees                                                                                                   | Reported Outcomes of Sickness Absences                                                                                                                       |
|--------------------|--------------|--------------------------------------------------------------------------------------------------------------------------------------------------------------------------------------------------------------------------------------------------|---------------------------------------------------------------------------------------------------|-----------------------------------------------------------------------------------------------------------------------------------|--------------------------------------------------------------------------------------------------------------------------------------------------------------|
| Dewa et al. (2011) | CA (Ontario) | Mental and behavioural disorders (ICD-10 F00-F99, Z502, Z503, Z561-Z566, Z630-Z639, Z729, Z733, Z738, Z864, Z915): schizophrenia, mood disorders, stress-related disorders and mental and behavioral disorders due to psychoactive substance use | Disability free days = number of between end of first episode and beginning of subsequent episode | Number of employees with $\geq 1$ sickness absence episode:<br>Due to mental disorders = 422<br>Due to physical disorders = 3,171 | Median disability free days (standard error):<br>Previous episode for mental disorders = 673 (79.8)<br>Previous episode for physical disorders = 1053 (48.6) |

| Author(s)              | Country | Mental Disorders                                                                                                                                                                                                                                                          | Outcome Measure                                                                                                                                                                                                                                                                                                             | Number of episodes or employees                                                                                                      | Reported Outcomes of Sickness Absences                                                                                                                                                                                                                                                                                                                                                                                                                                                                                                                                                                                                                                                                                                                                                         |
|------------------------|---------|---------------------------------------------------------------------------------------------------------------------------------------------------------------------------------------------------------------------------------------------------------------------------|-----------------------------------------------------------------------------------------------------------------------------------------------------------------------------------------------------------------------------------------------------------------------------------------------------------------------------|--------------------------------------------------------------------------------------------------------------------------------------|------------------------------------------------------------------------------------------------------------------------------------------------------------------------------------------------------------------------------------------------------------------------------------------------------------------------------------------------------------------------------------------------------------------------------------------------------------------------------------------------------------------------------------------------------------------------------------------------------------------------------------------------------------------------------------------------------------------------------------------------------------------------------------------------|
| Koopmans et al. (2010) | NL      | Common mental disorders (CMD) from medical certification: stress-related (distress and adjustment disorders) (ICD-10 R45, F43) and psychiatric (mild to moderate depressive and anxiety disorders) (ICD-10 F32.0, F32.1, F40.0, F40.1, F40.2, F41.0, F41.1, F41.2, F41.3) | <p>Recurrence density = number of employees with recurrent episodes by the worker-years in the sub-population of men and women with a previous episode of sickness absence due to a CMD</p> <p>New episodes = &gt; 28 days apart</p> <p>Worker-years = years of coverage from index episode to end of employment period</p> | <p>Number of employees with ≥ 1 sickness absence due to CMD = 8,951</p> <p>Total number of sickness absence due to CMD = 10,921</p>  | <p>From 2001-2007, episodes per worker with ≥ 1 sickness absence related to CMD:</p> <p>1 episode = 82%</p> <p>2 episodes = 14%</p> <p>3 episodes = 3%</p> <p>≥ 4 episodes = 1%</p> <p>From 2001-07, CMD recurrence densities/1,000 worker-years (95% CI):</p> <p>Men:<br/>Stress = 74.4 (72.9, 76.0)<br/>Psychiatric = 83.8 (71.9, 95.7)<br/>Total CMD = 75.6 (70.7, 80.4)</p> <p>Women:<br/>Stress = 78.4 (75.9, 80.9)<br/>Psychiatric = 78.9 (64.1, 93.7)<br/>Total CMD = 78.5 (72.4, 84.6)</p> <p>From 2001-07, CMD sickness absence median time to onset recurrence (in months) (95% CI):</p> <p>Men:<br/>Stress = 11 (11, 13)<br/>Psychiatric = 12 (8, 15)<br/>Total CMD = 11 (10, 13)</p> <p>Women:<br/>Stress = 11 (9, 12)<br/>Psychiatric = 10 (8, 12)<br/>Total CMD = 10 (9, 12)</p> |
| Koopmans et al. (2011) | NL      | Common mental disorders (CMD) from medical certification: stress-related (distress and adjustment disorders) (ICD-10 R45, F43) and psychiatric (mild to moderate depressive and anxiety disorders) (ICD-10 F32, F40, F41)                                                 | <p>Recurrence density = number of employees with recurrent episodes by the worker-years in the sub-population of men and women with a previous episode of sickness absence due to a CMD</p> <p>Worker-years = years of coverage from index episode to end of employment period</p>                                          | <p>Number of employees with ≥ 1 sickness absence due to CMD = 9,904</p> <p>Total number of sickness absences due to CMD = 12,404</p> | <p>From 2001-07, CMD sickness absence median time to onset recurrence (in months) (95% CI):</p> <p>Total = 10 (10, 11)<br/>Distress symptoms = 11 (10, 12)<br/>Adjustment disorder = 11 (9, 12)<br/>Depressive symptoms = 10 (7, 12)<br/>Anxiety symptoms = 10 (7, 14)<br/>Other CMD disorders = 8 (6,9)</p>                                                                                                                                                                                                                                                                                                                                                                                                                                                                                   |

| Author(s)            | Country | Mental Disorders                                                            | Outcome Measure                                                                                                                                                                                        | Number of episodes or employees                                                                                                                                                                                                                                                                | Reported Outcomes of Sickness Absences                                                                                                                                                                                                                                                                |
|----------------------|---------|-----------------------------------------------------------------------------|--------------------------------------------------------------------------------------------------------------------------------------------------------------------------------------------------------|------------------------------------------------------------------------------------------------------------------------------------------------------------------------------------------------------------------------------------------------------------------------------------------------|-------------------------------------------------------------------------------------------------------------------------------------------------------------------------------------------------------------------------------------------------------------------------------------------------------|
| Reis et al. (2011)   | BR      | Mental and behavioral disorders (ICD-10 F00-F99)                            | Duration of episode = Number of calendar days absent from work<br>Recurrence density = number of recurrent sickness absences divided by total worker-time at risk for the subsequent sickness absences | Number of sickness absence episodes:<br>Due to any disorder = 5,138<br>Due to mental and behavioural disorders = 324                                                                                                                                                                           | Recurrence density/100 worker-months:<br>Due to any disorder = 17.37<br>Due to mental and behavioural disorders = 6.72                                                                                                                                                                                |
| Roelen et al. (2010) | NL      | Mental and behavioral disorders from medical certification (ICD-10 F00-F99) | Recurrence density = number of employees with recurrent episodes by the worker-years in the sub-population of men and women with a previous episode of sickness absence                                | Number of employees with $\geq 1$ sickness absence = 36,342<br>Number of employees with $\geq 1$ sickness absence due to mental and behavioural disorders = 7,197<br>Number of employees with $> 1$ sickness absence due to mental and behavioural disorders = 1,400<br>Worker-years = 363,461 | From 2001-2007,<br>Recurrence density/1,000 worker-years (95% CI):<br>Mental and behavioural disorders = 80.4 (74.9, 86.0)<br>Any disorder = 81.6 (79.1, 84.0)<br>Median days to recurrence (in days) (95% CI):<br>Mental and behavioural disorders = 328 (284, 372)<br>Any disorder = 384 (367, 401) |

*Time between Sickness Absence Episodes.* Four studies reported the time between episodes related to mental disorders. Koopmans et al.<sup>8</sup> found that the median time was 10 months. In addition, Koopmans et al.<sup>9</sup> observed the median lengths of episode free-months were similar for men (11 months) and women (10 months).

Roelen et al.<sup>10</sup> compared lengths of episode free-days for those related to mental disorders versus those related to any disorder. They found the median length of episode free days was longer for workers who had a previous sickness absence episode for any disorder (384 days) versus those who had a previous episode related to a mental disorder (328 days). Dewa et al.<sup>12</sup> also observed a longer period of sickness absence free days for workers who had a previous sickness absence episode related to a physical disorder (1053 days) than those who had a previous sickness absence episode related to a mental disorder (673 days).

## DISCUSSION

This systematic literature review identified 10 studies that ranged from good to excellent quality. The results of the studies could be grouped into two general categories: (1) outcomes focusing on return-to-work and (2) outcomes focusing on sickness absence recurrence. These studies suggest that these are two areas of workplace burden to employers.

Two of the included studies that looked at RTW outcomes indicated that the majority of workers who have a sickness absence return to work at the end of the absence<sup>13 15</sup>. This trend is consistent with early studies that indicated a large proportion of workers return to work at the end of their absence<sup>17 18</sup>. This suggests that retention of workers may not be one of the major burdens associated with sickness absence. It also raises the question of what happens to workers who do not return to work at the end of their sickness absence. This is particularly salient for North American (i.e., United States and Canada) employers who offer long-term work disability benefits to their workforces. Although a small group, workers who receive long-term disability benefits after reaching the limits of their sickness absence benefits could represent high costs. One estimate suggested that it could cost CAN \$80,000 per long-term disability claim<sup>5</sup>.

The results of the studies suggest that sickness absence duration ranges from 5-119 days. The variation among the estimates may reflect the variation among the sickness benefit schemes of the jurisdictions in which the studies were conducted. However, there were consistencies among a number of reported patterns. For example, the numbers of sickness absence days related to mental disorders were greater than those for physical disorders in the four studies that reported them<sup>6 9 14 15</sup>. In addition, compared to absences related to physical disorders, those related to mental disorders may be of greater length and in turn, burden.

With regard to sickness absence recurrence, the studies that calculated recurrence rates

1  
2  
3 reported rates that ranged from 7/100 worker months to 80/1,000 worker-years. While there is  
4  
5 variation in the magnitudes of the reported rates, two studies also indicated that the time between  
6  
7 a sickness absence recurrence is consistently longer for workers who had a past sickness absence  
8  
9 related to a physical disorder versus a mental disorder. However, while the pattern seemed to be  
10  
11 consistent, the median numbers of sickness absence free days were two to three times greater in  
12  
13 Dewa et al.'s<sup>12</sup> study than Roelen et al.'s<sup>10</sup>. Because workers within these respective studies are  
14  
15 exposed to the same sickness benefit scheme, the differences within the studies suggest there  
16  
17 may be other potential contributors to the differences than solely the sickness benefit scheme.  
18  
19 There is an opportunity for future research to explore the role that individual (e.g., the chronic  
20  
21 nature of mental disorders), occupational (e.g., job characteristics) and environmental (e.g.,  
22  
23 workplace stigma) factors play in the differences in the recurrence of physical versus mental  
24  
25 disorder related sickness absences.  
26  
27  
28  
29  
30

31  
32 These results also suggest that although most workers return to work, they also may be at  
33  
34 higher risk of a repeat sickness absence episode. While there have been few studies estimating  
35  
36 the cost of re-integration, there is evidence suggesting that there may be costs to the workplace  
37  
38 related to the process of re-integrating a worker who has been absent because of a sickness  
39  
40 episode<sup>19-21</sup>. Moreover, there is evidence to suggest that employers and workers have identified  
41  
42 work sustainability without recurrence as an important work outcome<sup>22</sup>. Given that work  
43  
44 sustainability without recurrence seems to be a preference of both workers and employees and  
45  
46 there are potential costs related to reintegration, these findings suggest that it may be important  
47  
48 to consider number of episodes as well as total number of absence days alone. It is also an area  
49  
50 that warrants further research to understand the costs associated with the re-integration process.  
51  
52  
53

54  
55 It should be noted that the sickness absence outcomes that have been studied are related  
56  
57  
58  
59  
60

1  
2  
3 to the potential direct costs to employers. That is, because of the effect on work productivity,  
4  
5 employers will be interested in the length of sickness absences as well as recurrence of sickness  
6  
7 absence. However, from a societal perspective, this presents only part of picture. What happens  
8  
9 to workers who do not return to work? This is a question governments may want answered  
10  
11 especially if it means that those workers become enrolled in the public disability programs<sup>23</sup>.  
12  
13 Thus, future work should also examine this group of workers particularly if factors can be  
14  
15 identified that retain them in the labour market.  
16  
17  
18  
19

### 20 **Strengths and Limitations Related to Interpreting the Literature**

21  
22 There were a number of strengths of the current body of literature reviewed. First, all of  
23  
24 the data from the included studies used data from complete populations of people who had a  
25  
26 sickness absence. This minimizes the potential for selection bias within populations. However,  
27  
28 selection bias related to the population chosen is still a possibility. Indeed, there was variation in  
29  
30 the populations covered ranging from multiple to single organizations. Consequently, it will be  
31  
32 important for future work to examine whether the results are generalizable to different  
33  
34 populations.  
35  
36  
37

38  
39 An additional strength of the included studies was that they used standardized diagnostic  
40  
41 classification systems. All included depressive and anxiety disorders as well as stress-related  
42  
43 disorders. However, there was variability in the other types of mental disorders considered. This  
44  
45 could have affected some of the reported results. At the same time, it should be noted that the  
46  
47 majority of sickness absences related to mental disorders are attributable to depression, anxiety  
48  
49 and stress-related disorders<sup>24 25</sup>. This suggests that inclusion of these disorders would capture a  
50  
51 large proportion of the sickness absences related to mental disorders.  
52  
53  
54

55 A limitation of the studies was the variation in the years from which the data were taken.  
56  
57  
58  
59  
60

1  
2  
3 Although all studies used post-2000, there could have been changes within systems that could  
4 have affected incidence rates. For example, in the Netherlands, extensive legislative changes  
5 occurred between 2000 and 2013 which affected rates<sup>7 26</sup>. In fact, the changes are reflected in the  
6 results reported by Roelen et al.<sup>16</sup>. Similarly, changes could have been implemented in other  
7 countries such that results may not currently be generalizable.

8  
9  
10 Another limitation was variability in the sickness absence benefit schemes. That is, the  
11 variation in the length of sickness absence episodes in part could be related to the length of  
12 sickness absence coverage. The longer the coverage, the longer the absence may be. The  
13 frequency of sickness absence recurrence also could be affected by the benefit scheme. If there  
14 are limits on the number of sickness absence days that a worker is allowed annually, those  
15 workers could have fewer episodes than workers for whom limits do not exist.

### 16 17 18 19 20 21 22 23 24 25 26 27 28 29 **Strengths and Limitations of the Search Strategy**

30  
31 Although five databases were used in the search, articles that did not appear in any of the  
32 databases could have been overlooked. This possibility was decreased due to the broad scope of  
33 each of the searched databases and the hand search. Another limitation is related to the fact that  
34 the search focused on articles published in English-language journals. However, despite the  
35 English-language constraint, the identified studies originated in European, North American and  
36 Latin American countries. This indicates that although they are not in countries where English is  
37 the first language, at least some of these researchers publish in English-language journals.

### 38 39 40 41 42 43 44 45 46 47 48 **CONCLUSIONS**

49  
50 This systematic literature review identified only 10 studies published in the last decade.  
51 Five of them were from the Netherlands. This suggests that this is an emerging area of research.  
52 The results of these studies suggest that we are in the early stages of understanding the aspects of  
53  
54  
55  
56  
57  
58  
59  
60

1  
2  
3 sickness absences that contribute to their burden and in the process, areas to target to effectively  
4 decrease their costs. At the same time, there are patterns in the results that could be useful in  
5  
6 developing interventions. The results of these studies suggest that along with the incidence of  
7  
8 sickness absence related to mental disorders, the length and recurrence (i.e., frequency of  
9  
10 recurrence and time between recurrence) of these sickness absences should be areas of concern.  
11  
12 Thus, it may be important to evaluate interventions with respect to these two aspects of sickness  
13  
14 absences.  
15  
16  
17  
18  
19

### 20 **DATA SHARING STATEMENT**

21 All the published papers used in this manuscript are publicly available. There are no data  
22  
23 available.  
24  
25

### 26 **FUNDING**

27 This work was funded by [one of the author's] Canadian Institutes of Health Research/Public  
28  
29 Health Agency of Canada Applied Public Health Chair (FRN#:86895). Any views expressed or  
30  
31 errors are the sole responsibility of the authors.  
32  
33  
34  
35

### 36 **COMPETING INTERESTS**

37 The authors declare that they have no competing interests.  
38  
39

### 40 **CONTRIBUTORSHIP STATEMENT**

41 CSD led the conception, design, data acquisition, analysis and interpretation of the data; she also  
42  
43 led the writing of the overall manuscript. DL collaborated on the design, data acquisition and  
44  
45 analysis; he contributed to the writing of the overall manuscript and led the writing of the  
46  
47 Methods section. SB collaborated on the design and data acquisition and contributed to the  
48  
49 writing of the manuscript. All authors are guarantors of the final manuscript.  
50  
51  
52  
53  
54  
55  
56  
57  
58  
59  
60



## REFERENCES

1. Greenberg PE, Leong SA, Birnbaum HG, et al. The economic burden of depression with painful symptoms. *Journal of Clinical Psychiatry* 2003;**64 Suppl 7**:17-23.
2. Stephens T, Joubert N. The economic burden of mental health problems in Canada. *Chronic Dis Can* 2001;**22**(1):18-23.
3. Greenberg PE, Sisitsky T, Kessler RC, et al. The economic burden of anxiety disorders in the 1990s. *J Clin Psychiatry* 1999;**60**(7):427-35.
4. Stewart WF, Ricci JA, Chee E, et al. Cost of lost productive work time among US workers with depression.[Erratum appears in *JAMA*. 2003 Oct 22;290(16):2218]. *JAMA* 2003;**289**(23):3135-44.
5. Sairanen S, Matzanke D, Smeall D. The Business Case: Collaborating to Help Employees Maintain Their Mental Well-Being. *Healthcare Papers* 2011(11):78-84.
6. Dewa CS, Chau N, Dermer S. Examining the comparative incidence and costs of physical and mental health-related disabilities in an employed population. *Journal of Occupational & Environmental Medicine* 2010;**52**(7):758-62.
7. Organisation for Economic Cooperation and Development. *Transforming Disability into Ability: Policies to promote work and income security for disabled people*: OECD Publishing, 2003.
8. Koopmans PC, Bultmann U, Roelen CA, et al. Recurrence of sickness absence due to common mental disorders. *International Archives of Occupational & Environmental Health* 2011;**84**(2):193-201.
9. Koopmans PC, Roelen CA, Bultmann U, et al. Gender and age differences in the recurrence of sickness absence due to common mental disorders: a longitudinal study. *BMC Public Health* 2010;**10**:426.
10. Roelen CA, Koopmans PC, Anema JR, et al. Recurrence of medically certified sickness absence according to diagnosis: a sickness absence register study. *Journal of Occupational Rehabilitation* 2010;**20**(1):113-21.
11. Reis RJ, Utzet M, La Rocca PF, et al. Previous sick leaves as predictor of subsequent ones. *International Archives of Occupational & Environmental Health* 2011;**84**(5):491-9.
12. Dewa CS, Chen MC, Chau N, et al. Examining factors associated with the length of short-term disability-free days among workers with previous short-term disability episodes. *Journal of Occupational & Environmental Medicine* 2011;**53**(6):669-73.
13. Board BJ, Brown J. Barriers and enablers to returning to work from long-term sickness absence: Part I-A quantitative perspective. *American Journal of Industrial Medicine* 2011;**54**(4):307-24.
14. Barbosa-Branco A, Bultmann U, Steenstra I. Sickness benefit claims due to mental disorders in Brazil: associations in a population-based study. *Cadernos de Saude Publica* 2012;**28**(10):1854-66.
15. Koopmans PC, Roelen CAM, Groothoff JW. Sickness absence due to depressive symptoms. *International Archives of Occupational and Environmental Health* 2008;**81**(6):711-19.
16. Roelen CA, Koopmans PC, Hoedeman R, et al. Trends in the incidence of sickness absence due to common mental disorders between 2001 and 2007 in the Netherlands. *European Journal of Public Health* 2009;**19**(6):625-30.
17. Conti DJ, Burton WN. The economic impact of depression in a workplace. *J Occup Med* 1994;**36**(9):983-8.

18. Dewa CS, Goering P, Lin E, et al. Depression-related short-term disability in an employed population. *Journal of occupational and environmental medicine / American College of Occupational and Environmental Medicine* 2002;**44**(7):628-33.
19. Gates LB. Workplace Accommodation as a Social Process. *Journal of Occupational Rehabilitation* 2000;**10**(1):85-98.
20. Freeman D, Cromwell C, Aarenau D, et al. Factors Leading to Successful Workplace Integration of Employees Who Have Experienced Mental Illness. *Employee Assistance Quarterly* 2004;**19**(4):51-58.
21. Tse S. What do employers think about employing people with experience of mental illness in New Zealand workplaces? *Work* 2004;**23**(3):267-74.
22. Hees HL, Nieuwenhuijsen K, Koeter MWJ, et al. Towards a New Definition of Return-to-Work Outcomes in Common Mental Disorders from a Multi-Stakeholder Perspective. *Plos One* 2012;**7**(6).
23. Dewa CS, McDaid D, Ettner SL. An international perspective on worker mental health problems: who bears the burden and how are costs addressed? *Canadian Journal of Psychiatry - Revue Canadienne de Psychiatrie* 2007;**52**(6):346-56.
24. Henderson M, Glozier N, Holland Elliott K. Long term sickness absence. *BMJ* 2005;**330**(7495):802-3.
25. Roelen CA, Norder G, Koopmans PC, et al. Employees sick-listed with mental disorders: who returns to work and when? *Journal of Occupational Rehabilitation* 2012;**22**(3):409-17.
26. Schene A, Hees H, Koeter M, et al. *Work, mental health and depression*. Wiley-Blackwell, 2013.

## Search Strategy

Database: Medline Current

Search Terms: [exp Mental Disorders/ OR exp Mentally Ill Persons/ OR (mental adj3 disorder\$).mp. OR (mental\$ adj3 ill\$).mp. OR (psychiatric\$ adj3 disorder\$).mp. OR (psychiatric\$ adj3 ill\$).mp. OR exp Substance-Related Disorders/ OR exp "Diagnosis, Dual (Psychiatry)"/ OR (concurrent\$ adj3 disorder\$).mp. OR (dual\$ adj3 diag\$).mp. OR (alcohol\$ adj3 abus\$).mp. OR (alcohol\$ adj3 depend\$).mp. OR (substance\$ adj3 abus\$).mp. OR (substance\$ adj3 depend\$).mp. OR (drug\$ adj3 abus\$).mp. OR (drug\$ adj3 depend\$).mp. OR addiction\$.mp.] **AND** [exp Absenteeism/ OR exp Sick Leave/ OR exp Return to Work/ OR exp Personnel Turnover/ OR Social Welfare/ OR Public Assistance/ OR exp Insurance Disability/ OR exp Insurance Benefits/ OR exp Salaries/ OR exp Fringe Benefits/ OR exp Social Security/ OR exp Retirement/ OR (sick\$ adj3 day\$).mp. OR (illness\$ adj3 leave\$).mp. OR (disabilit\$ adj3 leave\$).mp. OR (short term disabilit\$).mp. OR (long term disabilit\$).mp. OR (work\$ adj3 absence\$).mp. OR (return\$ to work\$).mp. OR (work\$ adj3 turnover\$).mp. OR (employ\$ adj3 turnover\$).mp. OR (disabilit\$ benefit\$).mp. OR (employ\$ benefit\$).mp. OR (work\$ benefit\$).mp. OR (sick\$ benefit\$).mp. OR (incapacit\$ benefit\$).mp. OR (social\$ welfar\$).mp. OR (public\$ assistanc\$).mp. OR (insurance\$ disabilit\$).mp. OR (insurance\$ benefit\$).mp. OR (old\$ age\$ assistanc\$).mp. OR (social\$ securit\$).mp. OR retire\$.mp.] **AND** [sn.fs. OR ep.fs. OR preval\$.mp. OR incid\$.mp. OR statistic\$.mp. OR exp Epidemiologic Methods/]

1  
2  
3 Database: Medline In-process

4 Search Terms: [exp Mental Disorders/ OR exp Mentally Ill Persons/ OR (mental adj3  
5 disorder\$).mp. OR (mental\$ adj3 ill\$).mp. OR (psychiatric\$ adj3 disorder\$).mp. OR  
6 (psychiatric\$ adj3 ill\$).mp. OR exp Substance-Related Disorders/ OR exp "Diagnosis,  
7 Dual (Psychiatry)"/ OR (concurrent\$ adj3 disorder\$).mp. OR (dual\$ adj3 diag\$).mp. OR  
8 (alcohol\$ adj3 abus\$).mp. OR (alcohol\$ adj3 depend\$).mp. OR (substance\$ adj3  
9 abus\$).mp. OR (substance\$ adj3 depend\$).mp. OR (drug\$ adj3 abus\$).mp. OR (drug\$  
10 adj3 depend\$).mp. OR addiction\$.mp.] **AND** [exp Absenteeism/ OR exp Sick Leave/  
11 OR exp Return to Work/ OR exp Personnel Turnover/ OR Social Welfare/ OR Public  
12 Assistance/ OR exp Insurance Disability/ OR exp Insurance Benefits/ OR exp Salaries/  
13 OR exp Fringe Benefits/ OR exp Social Security/ OR exp Retirement/ OR (sick\$ adj3  
14 day\$).mp. OR (illness\$ adj3 leave\$).mp. OR (disabilit\$ adj3 leave\$).mp. OR (short term  
15 disabilit\$).mp. OR (long term disabilit\$).mp. OR (work\$ adj3 absence\$).mp. OR (return\$  
16 to work\$).mp. OR (work\$ adj3 turnover\$).mp. OR (employ\$ adj3 turnover\$).mp. OR  
17 (disabilit\$ benefit\$).mp. OR (employ\$ benefit\$).mp. OR (work\$ benefit\$).mp. OR (sick\$  
18 benefit\$).mp. OR (incapacit\$ benefit\$).mp. OR (social\$ welfar\$).mp. OR (public\$  
19 assistanc\$).mp. OR (insurance\$ disabilit\$).mp. OR (insurance\$ benefit\$).mp. OR (old\$  
20 age\$ assistanc\$).mp. OR (social\$ securit\$).mp. OR retire\$.mp.] **AND** [sn.fs. OR ep.fs.  
21 OR preval\$.mp. OR incid\$.mp. OR statistic\$.mp. OR exp Epidemiologic Methods/]

1  
2  
3  
4 Database: PsycINFO

5  
6 Search Terms: [exp Mental Disorders/ OR exp Psychiatric patients/ OR (mental adj3  
7  
8 disorder\$).mp. OR (mental\$ adj3 ill\$).mp. OR (psychiatric\$ adj3 disorder\$).mp. OR  
9  
10 (psychiatric\$ adj3 ill\$).mp. OR exp Drug Abuse/ OR exp Drug Addiction/ OR exp Drug  
11  
12 Dependency/ OR exp Alcohol Abuse/ OR exp Addiction/ OR exp Dual Diagnosis/ OR  
13  
14 (concurrent\$ adj3 disorder\$).mp. OR (dual\$ adj3 diag\$).mp. OR (alcohol\$ adj3  
15  
16 abus\$).mp. OR (alcohol\$ adj3 depend\$).mp. OR 321\$.cc.[psychological disorders class  
17  
18 code] OR 3233.cc.[Substance abuse & addic class code] OR (substance\$ adj3  
19  
20 depend\$).mp. OR (drug\$ adj3 abus\$).mp. OR (drug\$ adj3 depend\$).mp. OR  
21  
22 addiction\$.mp.] **AND** [exp Employee Absenteeism/ OR (absenteeism\$).mp. OR exp  
23  
24 Employee Leave Benefits/ OR exp Reemployment/ OR exp Employee Turnover/ OR  
25  
26 (social welfar\$).mp. OR exp Insurance/ OR exp Salaries/ OR exp employee benefits/  
27  
28 OR exp Social Security/ OR exp Retirement/ OR (sick\$ adj3 day\$).mp. OR (illness\$  
29  
30 adj3 leave\$).mp. OR (disabilit\$ adj3 leave\$).mp. OR (short term disabilit\$).mp. OR (long  
31  
32 term disabilit\$).mp. OR (work\$ adj3 absence\$).mp. OR (return\$ to work\$).mp. OR  
33  
34 (work\$ adj3 turnover\$).mp. OR (employ\$ adj3 turnover\$).mp. OR (disabilit\$  
35  
36 benefit\$).mp. OR (employ\$ benefit\$).mp. OR (work\$ benefit\$).mp. OR (sick\$  
37  
38 benefit\$).mp. OR (incapacit\$ benefit\$).mp. OR (social\$ welfar\$).mp. OR (public\$  
39  
40 assistanc\$).mp. OR (insurance\$ disabilit\$).mp. OR (insurance\$ benefit\$).mp. OR (old\$  
41  
42 age\$ assistanc\$).mp. OR (social\$ securit\$).mp. OR retire\$.mp.] **AND** [preval\$.mp. OR  
43  
44 incid\$.mp. OR statistic\$.mp. OR exp Epidemiology/ OR ext Data collection/ OR  
45  
46 epidemiolog\$.mp. OR (data collection\$).mp. OR survey\$.mp. OR questionnair\$.mp.]

1  
2  
3 Database: Econlit

4  
5 Search Terms: [mental disorder\* OR mental disorder\* OR mental ill\* OR psychiatric\*  
6  
7  
8 OR concurrent\* disorder\* OR dual\* diag\* OR alcohol\* OR substance\* abus\* OR  
9  
10 substance\* depend\* OR drug\* abus\* OR drug\* depend\* OR addic\*] **AND** [absent\* OR  
11  
12 sick\* OR ill\* OR disabilit\* leav\* OR short term disabilit\* OR long term disabilit\* OR work\*  
13  
14 OR absence\* OR return\* to work\* OR work\* turnover\* OR employ\* OR benefit\* OR  
15  
16 welfar\* OR public\* assistanc\* OR insurance\* OR old\* age\* assistanc\* OR social securit\*  
17  
18 OR retire\*]  
19  
20  
21  
22  
23

24 Database: Web of Science

25  
26 Search Terms: [mental disorder\* OR mental ill\* OR psychiatric\* disorder\* OR  
27  
28 psychiatric\* ill\* OR concurrent\* disorder\* OR dual\* diag\* OR alcohol\* abus\* OR alcohol\*  
29  
30 depend\* OR substance\* abus\* OR substance\* depend\* OR drug\* abus\* OR drug\*  
31  
32 depend\* OR addiction\*] **AND** [absenteeism\* OR sick\* day\* OR illness\* leave\* OR  
33  
34 disabilit\* leav\* OR short term disabilit\* OR long term disabilit\* OR work\* absence\* OR  
35  
36 return\* to work\* OR work\* turnover\* OR employ\* turnover\* OR disabilit\* benefit\* OR  
37  
38 employ\* benefit\* OR work\* benefit\* OR sick\* benefit\* OR incapacit\* benefit\* OR social\*  
39  
40 welfar\* OR public\* assistanc\* OR insurance\* disabilit\* OR insurance\* benefit\* OR old\*  
41  
42 age\* assistanc\* OR social securit\* OR retire\*] **AND** [preval\* OR incid\* OR statistic\* OR  
43  
44 epidemiolog\* OR data collection\* OR survey\* OR questionnair\*]  
45  
46  
47  
48  
49  
50  
51  
52  
53  
54  
55  
56  
57  
58  
59  
60

### Quality Assessment Checklist

| Author(s)            | Year | 1  | 2  | 3 | 4  | 5 | 6 | 7 | 8  | 9 | 10 | Total |
|----------------------|------|----|----|---|----|---|---|---|----|---|----|-------|
| Barbosa-Branco et al | 2012 | 1  | 1  | 0 | 1  | 1 | 1 | 0 | 1  | 0 | 1  | 7     |
| Board & Brown        | 2011 | 1  | 1  | 0 | 1  | 1 | 1 | 1 | 1  | 0 | 1  | 8     |
| Dewa et al           | 2010 | 1  | 1  | 0 | 1  | 1 | 1 | 1 | 1  | 1 | 1  | 9     |
| Dewa et al           | 2011 | 1  | 1  | 0 | 1  | 1 | 1 | 1 | 1  | 1 | 1  | 9     |
| Koopmans et al       | 2008 | 1  | 1  | 0 | 1  | 0 | 0 | 0 | 1  | 1 | 1  | 6     |
| Koopmans et al       | 2010 | 1  | 1  | 0 | 1  | 1 | 1 | 0 | 1  | 1 | 1  | 8     |
| Koopmans et al       | 2011 | 1  | 1  | 0 | 1  | 1 | 1 | 1 | 1  | 1 | 1  | 9     |
| Reis et al           | 2011 | 1  | 1  | 0 | 1  | 1 | 0 | 0 | 1  | 0 | 1  | 6     |
| Roelen et al         | 2009 | 1  | 1  | 0 | 1  | 1 | 1 | 1 | 1  | 1 | 1  | 9     |
| Roelen et al         | 2010 | 1  | 1  | 0 | 1  | 1 | 1 | 1 | 1  | 1 | 1  | 9     |
| <b>Total</b>         |      | 10 | 10 | 0 | 10 | 9 | 8 | 6 | 10 | 7 | 10 |       |

### Quality Assessment Criteria

1. The study population is well described
2. The data source is well described
3. The study sample is representative of all workers in the context
4. Mental disorders are included and reported
5. The system of diagnosis/classification is described
6. The sickness absence criteria are reported (i.e., pre-sickness absence days to qualify for sickness absence)
7. Sickness absence outcome measures are defined
8. Analytical methods are described
9. Uncertainty of estimates are reported
10. The stated research objective is met

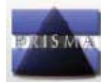

# PRISMA 2009 Checklist

| Section/topic                      | #  | Checklist item                                                                                                                                                                                                                                                                                              | Reported on page #  |
|------------------------------------|----|-------------------------------------------------------------------------------------------------------------------------------------------------------------------------------------------------------------------------------------------------------------------------------------------------------------|---------------------|
| <b>TITLE</b>                       |    |                                                                                                                                                                                                                                                                                                             |                     |
| Title                              | 1  | Identify the report as a systematic review, meta-analysis, or both.                                                                                                                                                                                                                                         | 1                   |
| <b>ABSTRACT</b>                    |    |                                                                                                                                                                                                                                                                                                             |                     |
| Structured summary                 | 2  | Provide a structured summary including, as applicable: background; objectives; data sources; study eligibility criteria, participants, and interventions; study appraisal and synthesis methods; results; limitations; conclusions and implications of key findings; systematic review registration number. | 2-3                 |
| <b>INTRODUCTION</b>                |    |                                                                                                                                                                                                                                                                                                             |                     |
| Rationale                          | 3  | Describe the rationale for the review in the context of what is already known.                                                                                                                                                                                                                              | 4-5                 |
| Objectives                         | 4  | Provide an explicit statement of questions being addressed with reference to participants, interventions, comparisons, outcomes, and study design (PICOS).                                                                                                                                                  | 5                   |
| <b>METHODS</b>                     |    |                                                                                                                                                                                                                                                                                                             |                     |
| Protocol and registration          | 5  | Indicate if a review protocol exists, if and where it can be accessed (e.g., Web address), and, if available, provide registration information including registration number.                                                                                                                               | N/A                 |
| Eligibility criteria               | 6  | Specify study characteristics (e.g., PICOS, length of follow-up) and report characteristics (e.g., years considered, language, publication status) used as criteria for eligibility, giving rationale.                                                                                                      | 6-7                 |
| Information sources                | 7  | Describe all information sources (e.g., databases with dates of coverage, contact with study authors to identify additional studies) in the search and date last searched.                                                                                                                                  | 5-6                 |
| Search                             | 8  | Present full electronic search strategy for at least one database, including any limits used, such that it could be repeated.                                                                                                                                                                               | Supplemental File 1 |
| Study selection                    | 9  | State the process for selecting studies (i.e., screening, eligibility, included in systematic review, and, if applicable, included in the meta-analysis).                                                                                                                                                   | 6-7                 |
| Data collection process            | 10 | Describe method of data extraction from reports (e.g., piloted forms, independently, in duplicate) and any processes for obtaining and confirming data from investigators.                                                                                                                                  | N/A                 |
| Data items                         | 11 | List and define all variables for which data were sought (e.g., PICOS, funding sources) and any assumptions and simplifications made.                                                                                                                                                                       | 6-7                 |
| Risk of bias in individual studies | 12 | Describe methods used for assessing risk of bias of individual studies (including specification of whether this was done at the study or outcome level), and how this information is to be used in any data synthesis.                                                                                      | 7-8                 |
| Summary measures                   | 13 | State the principal summary measures (e.g., risk ratio, difference in means).                                                                                                                                                                                                                               | N/A                 |
| Synthesis of results               | 14 | Describe the methods of handling data and combining results of studies, if done, including measures of consistency (e.g., $I^2$ ) for each meta-analysis.                                                                                                                                                   | N/A                 |



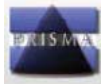

# PRISMA 2009 Checklist

| Section/topic                 | #  | Checklist item                                                                                                                                                                                           | Reported on page #  |
|-------------------------------|----|----------------------------------------------------------------------------------------------------------------------------------------------------------------------------------------------------------|---------------------|
| Risk of bias across studies   | 15 | Specify any assessment of risk of bias that may affect the cumulative evidence (e.g., publication bias, selective reporting within studies).                                                             | 7-8                 |
| Additional analyses           | 16 | Describe methods of additional analyses (e.g., sensitivity or subgroup analyses, meta-regression), if done, indicating which were pre-specified.                                                         | N/A                 |
| <b>RESULTS</b>                |    |                                                                                                                                                                                                          |                     |
| Study selection               | 17 | Give numbers of studies screened, assessed for eligibility, and included in the review, with reasons for exclusions at each stage, ideally with a flow diagram.                                          | 8, Figure 1         |
| Study characteristics         | 18 | For each study, present characteristics for which data were extracted (e.g., study size, PICOS, follow-up period) and provide the citations.                                                             | 9-10, Table 1       |
| Risk of bias within studies   | 19 | Present data on risk of bias of each study and, if available, any outcome level assessment (see item 12).                                                                                                | Supplemental File 2 |
| Results of individual studies | 20 | For all outcomes considered (benefits or harms), present, for each study: (a) simple summary data for each intervention group (b) effect estimates and confidence intervals, ideally with a forest plot. | 12-18, Table 2-3    |
| Synthesis of results          | 21 | Present results of each meta-analysis done, including confidence intervals and measures of consistency.                                                                                                  | N/A                 |
| Risk of bias across studies   | 22 | Present results of any assessment of risk of bias across studies (see Item 15).                                                                                                                          | N/A                 |
| Additional analysis           | 23 | Give results of additional analyses, if done (e.g., sensitivity or subgroup analyses, meta-regression [see Item 16]).                                                                                    | N/A                 |
| <b>DISCUSSION</b>             |    |                                                                                                                                                                                                          |                     |
| Summary of evidence           | 24 | Summarize the main findings including the strength of evidence for each main outcome; consider their relevance to key groups (e.g., healthcare providers, users, and policy makers).                     | 19-21               |
| Limitations                   | 25 | Discuss limitations at study and outcome level (e.g., risk of bias), and at review-level (e.g., incomplete retrieval of identified research, reporting bias).                                            | 21-22               |
| Conclusions                   | 26 | Provide a general interpretation of the results in the context of other evidence, and implications for future research.                                                                                  | 22-23               |
| <b>FUNDING</b>                |    |                                                                                                                                                                                                          |                     |
| Funding                       | 27 | Describe sources of funding for the systematic review and other support (e.g., supply of data); role of funders for the systematic review.                                                               | 23                  |

From: Moher D, Liberati A, Tetzlaff J, Altman DG, The PRISMA Group (2009). Preferred Reporting Items for Systematic Reviews and Meta-Analyses: The PRISMA Statement. PLoS Med 6(6): e1000097. doi:10.1371/journal.pmed1000097

For more information, visit: [www.prisma-statement.org](http://www.prisma-statement.org).

1  
2  
3  
4  
5  
6  
7  
8  
9  
10  
11  
12  
13  
14  
15  
16  
17  
18  
19  
20  
21  
22  
23  
24  
25  
26  
27  
28  
29  
30  
31  
32  
33  
34  
35  
36  
37  
38  
39  
40  
41  
42  
43  
44  
45  
46  
47  
48  
49  
50  
51  
52  
53  
54  
55  
56  
57  
58  
59  
60

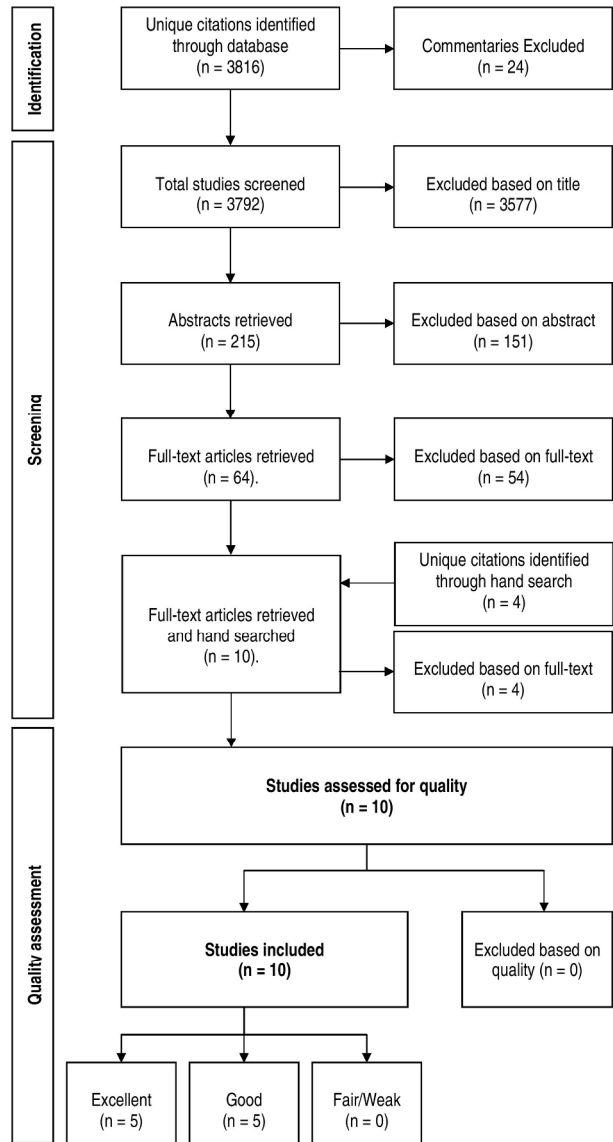

215x279mm (300 x 300 DPI)

# BMJ Open

## Work Outcomes of Sickness Absence Related to Mental Disorders: A Systematic Literature Review

|                                 |                                                                                                                                                                                                                                                                                                                                                             |
|---------------------------------|-------------------------------------------------------------------------------------------------------------------------------------------------------------------------------------------------------------------------------------------------------------------------------------------------------------------------------------------------------------|
| Journal:                        | <i>BMJ Open</i>                                                                                                                                                                                                                                                                                                                                             |
| Manuscript ID:                  | bmjopen-2014-005533.R1                                                                                                                                                                                                                                                                                                                                      |
| Article Type:                   | Research                                                                                                                                                                                                                                                                                                                                                    |
| Date Submitted by the Author:   | 11-Jun-2014                                                                                                                                                                                                                                                                                                                                                 |
| Complete List of Authors:       | Dewa, Carolyn; Centre for Research on Employment and Workplace Health, Centre for Addiction and Mental Health; University of Toronto, Department of Psychiatry<br>Loong, Desmond; Centre for Addiction and Mental Health, Centre for Research on Employment and Workplace Health<br>Bonato, Sarah; Centre for Addiction and Mental Health, Library Services |
| <b>Primary Subject Heading</b>: | Occupational and environmental medicine                                                                                                                                                                                                                                                                                                                     |
| Secondary Subject Heading:      | Health economics                                                                                                                                                                                                                                                                                                                                            |
| Keywords:                       | MENTAL HEALTH, OCCUPATIONAL & INDUSTRIAL MEDICINE, Health economics < HEALTH SERVICES ADMINISTRATION & MANAGEMENT                                                                                                                                                                                                                                           |
|                                 |                                                                                                                                                                                                                                                                                                                                                             |

SCHOLARONE™  
Manuscripts

1  
2  
3  
4  
5  
6  
7  
8  
9  
10  
11  
12  
13  
14  
15  
16  
17  
18  
19  
20  
21  
22  
23  
24  
25  
26  
27  
28  
29  
30  
31  
32  
33  
34  
35  
36  
37  
38  
39  
40  
41  
42  
43  
44  
45  
46  
47  
48  
49  
50  
51  
52  
53  
54  
55  
56  
57  
58  
59  
60

## Work Outcomes of Sickness Absence Related to Mental Disorders: A Systematic Literature Review

Carolyn S. Dewa <sup>1, 3§</sup>, Desmond Loong <sup>1</sup>, Sarah Bonato <sup>2</sup>

<sup>1</sup>Centre for Research on Employment and Workplace Health, Centre for Addiction and Mental Health, 33 Russell Street, Toronto, M5S 2S1, Canada

<sup>2</sup>Library Services, Centre for Addiction and Mental Health, 33 Russell Street, Toronto, M5S 2S1, Canada

<sup>3</sup>Department of Psychiatry, University of Toronto, 250 College Street, Toronto, M5T 1R8, Canada

Corresponding author:

Carolyn S. Dewa, MPH, PhD  
Head, Centre for Research on Employment and Workplace Health  
Centre for Addiction and Mental Health  
33 Russell St., Room 1000  
Toronto, Ontario M5S 2S1 Canada  
(416) 535-8501 x37033  
e-mail: carolyn.dewa@camh.ca

Keywords: mental disorders, work disability, return to work, sickness absence

Word count: 4774

Number of figures: 1

Number of tables: 3

Number of references: 32

Number of supplementary files: 2

## Work Outcomes of Sickness Absence Related to Mental Disorders: A Systematic Literature Review

### Abstract

**Objectives** The purpose of this systematic literature review is to examine the current state of knowledge regarding the return-to-work outcomes of sickness absences related to mental disorders that increase costs borne by employers. We address two questions: (1) Based on the existing literature, from the employer's perspective, what are the relevant economic return-to-work outcomes for sickness absences related to mental disorders? and (2) From the employer's economic perspective, are there gaps in knowledge about the relevant return-to-work outcomes for sickness absences related to mental disorders?

**Setting** The included studies used administrative data from either an employer, insurer or occupational healthcare provider.

**Participants** Studies included working adults between 18-65 years old who had a sickness absence related to a mental disorder.

**Primary and secondary outcome measures** The studies considered two general return-to-work outcome categories: (1) outcomes focusing on return-to-work and (2) outcomes focusing on sickness absence recurrence.

**Results** A total of 3,820 unique citations were identified. Of these, 10 studies were identified whose quality ranged from good to excellent. Half of the identified studies came from one country. The studies considered two characteristics of sickness absence: (1) whether and how long it took for a worker to return-to-work and (2) sickness absence recurrence. None of the studies examined return-to-work outcomes related to work reintegration.

**Conclusions** The existing literature suggests that along with the incidence of sickness absence related to mental disorders, the length of sickness absence episodes and sickness absence recurrence (i.e., number and time between) should be areas of concern. However, there also seems to be gaps in the literature regarding the work reintegration process and its associated costs.

## ARTICLE SUMMARY

## STRENGTHS AND LIMITATIONS OF THIS STUDY:

- Few studies have examined the current state of knowledge about sickness absence outcomes from the employer perspective; this paper examines the current state of knowledge regarding the return-to-work outcomes of sickness absences related to mental disorders that increase workplace burdens from the perspective of the employer.
- This systematic literature review employed a broad search of five electronic databases: (1) *Medline Current*, (2) *Medline In-process*, (3) *PsycINFO*, (4) *Econlit* and (5) *Web of Science*. A hand search was also conducted. In total, 3,820 unique citations were identified and reviewed by two reviewers.
- All included studies were based on data from complete populations of people who had a sickness absence; this minimizes the potential for selection bias within populations.
- The results of this review suggest that along with the incidence of sickness absence related to mental disorders, the length and sickness absence recurrence (i.e., frequency of sickness absence recurrence and time between sickness absence episodes) of these sickness absences should be areas of concern and future research. This highlights the importance of evaluating interventions with respect to these two aspects of sickness absences rather than focusing solely on whether or not a worker returns to work.
- The results of the search identified 10 papers that met inclusion criteria; this suggests that we are in the early stages of understanding the aspects of sickness absences that contribute to their burden and the areas to target to effectively decrease their costs.

1  
2  
3  
4  
5  
6  
7  
8  
9  
10  
11  
12  
13  
14  
15  
16  
17  
18  
19  
20  
21  
22  
23  
24  
25  
26  
27  
28  
29  
30  
31  
32  
33  
34  
35  
36  
37  
38  
39  
40  
41  
42  
43  
44  
45  
46  
47  
48  
49  
50  
51  
52  
53  
54  
55  
56  
57  
58  
59  
60

Around the world, there is increasing awareness about the economic costs of mental disorders. Estimates suggest that a large share of the burden of mental disorders can be attributed to work productivity losses. Between 30% and 60% of depression's cost is related to losses associated with decreased work productivity.<sup>1,2</sup> Decreased work productivity has been measured as work absences or an unproductive work day.

Because they take a societal perspective, most of the economic burden estimates for mental disorders rely on survey data (e.g.,<sup>1,3,4</sup>). One of the most identifiable types of work absences is related to sickness absences. Yet, few estimates specifically have taken sickness absences into account. Sickness absences are defined as work absences that require a medical certification and have an associated income replacement benefit. The costs of these specific types of absences are not only borne by society but employers in particular. Furthermore, because they involve the workplace, employers often assume the costs and responsibilities for implementing the interventions to address sickness absences. Thus, to effectively build the business case for employers to invest in interventions that target sickness absences related to mental disorders, it is important to identify the costs that employers recognize and directly bear. By using a comprehensive estimate of costs in economic evaluations and economic models we could more accurately estimate the types of cost-savings that employers can expect with an intervention.

The concern among employers regarding mental disorders has been fueled by the recognition that sickness absence episodes related to a mental disorder are costly and their incidence is steadily rising.<sup>5</sup> Estimates suggest that an episode related to a mental disorder can be double the cost of one related to a physical disorder.<sup>6</sup> The calculation of the cost of sickness absences related to mental disorders is comprised of two types of factors: (1) the number of days

1  
2  
3 absent and (2) the total number of sickness absences. It can be expected that the more sickness  
4  
5 absence days, the greater the total cost of the sickness absence. In addition, high costs could be  
6  
7 incurred with short sickness episodes if there are many repeat sickness episodes.  
8  
9

10 One approach to addressing the costs of sickness absence related to mental disorders  
11  
12 could be to decrease the impact of both the number of episodes and their lengths. This suggests  
13  
14 that interest should extend beyond merely whether or not a worker returns-to-work. Rather, it is  
15  
16 also important to understand the length and the frequency of sickness absence related to mental  
17  
18 disorders. Few studies have examined the current state of knowledge about sickness absence  
19  
20 outcomes from the employer perspective. To fill this gap, we conducted a systematic literature  
21  
22 review to examine the sickness absence outcomes reported in the literature. These outcomes  
23  
24 could help to identify the aspects of sickness absences that contribute to employer economic  
25  
26 burdens.  
27  
28  
29  
30

### 31 Purpose of the Paper

32  
33  
34 The purpose of this paper is to examine the current state of knowledge regarding the  
35  
36 return-to-work (RTW) outcomes of sickness absences related to mental disorders that increase  
37  
38 workplace burdens from the perspective of the employer. The question that we addressed in this  
39  
40 systematic review was, “Based on the existing literature, from the employer’s perspective, what  
41  
42 are the relevant economic return-to-work outcomes for sickness absences related to mental  
43  
44 disorders?” Answers to this question can highlight the aspects of sickness absences related to  
45  
46 mental disorders that could escalate the costs that employers face. Results of this review can  
47  
48 point to areas that sickness absence interventions could target. They can also suggest dimensions  
49  
50 along which future intervention effectiveness could be evaluated.  
51  
52  
53  
54

55 A secondary question we asked was, “From the employer’s economic perspective, are  
56  
57  
58  
59  
60



1  
2  
3 there gaps in knowledge about the relevant return-to-work outcomes for sickness absences  
4 related to mental disorders?" In answering this question, this review takes a first step in  
5  
6 understanding where the knowledge in this area is and is not being produced. It also suggests  
7  
8 areas where additional study is needed to more accurately estimate the costs of sickness absences  
9  
10 borne by employers.  
11  
12

## 13 14 15 **METHODS**

16  
17 This systematic literature review used publically available peer-reviewed studies. It  
18  
19 neither involved the collection of nor the use of primary data. As such, it was not subject to  
20  
21 research ethics board review.  
22  
23

24 Five electronic databases were searched for this systematic literature review: (1) *Medline*  
25  
26 *Current* (an index of biomedical research and clinical sciences journal articles), (2) *Medline In-*  
27  
28 *process* (an index of biomedical research and clinical sciences journal articles awaiting indexing  
29  
30 into *Medline Current*), (3) *PsycINFO* (an index of journal articles, books, chapters, and  
31  
32 dissertations in psychology, social sciences, behavioral sciences, and health sciences), (4) *Econlit*  
33  
34 (an index of journal articles, books, working papers and dissertations in Economics) and (5) *Web*  
35  
36 *of Science* (an index of journal articles, editorially selected books and conference proceedings  
37  
38 in life sciences and biomedical research). A search strategy was developed and executed for  
39  
40 each database with a professional health science librarian (SB) (Supplementary File 1 - Search  
41  
42 Strategy). *Medline Current*, *Medline In-process* and *PsychINFO* were searched using the *OID*  
43  
44 platform. *Econlit* and *Web of Science* were searched using the *ProQuest* and *Thomson Reuters*  
45  
46 search interface, respectively. The search was completed between February 2013 and March  
47  
48 2013 and was limited to English language journals published between 2002 and 2013.  
49  
50  
51  
52  
53

## 54 55 **Eligibility Criteria**

56  
57 The systematic literature search focused on the return-to-work outcomes of sickness  
58  
59  
60

1  
2  
3 absences of workers with medically certified sickness absences related to mental disorders.  
4  
5 Sickness absence encompassed sick leave, short-term disability leave and long-term disability  
6  
7 leave. These sickness absence benefits could be either publicly or privately sponsored. Their  
8  
9 receipt was conditional on employment and the absence benefit was claimed with the intention of  
10  
11 continued employment. We included studies that looked at “no cause” sickness absences such  
12  
13 that it was not compulsory that the absence was work-related. The search focused on identifying  
14  
15 articles about working adults between 18-65 years old who had a sickness absence related to a  
16  
17 mental disorder. Sickness absence outcome terms (i.e., length of sickness absence, return to  
18  
19 work, etc.) were not included in the search strategy. This was done to ensure all reported  
20  
21 sickness absence outcomes in the literature would be captured. The reference lists of relevant  
22  
23 studies were hand searched. Intervention studies, review articles and commentaries were  
24  
25 excluded.  
26  
27  
28  
29  
30

31  
32 A multi-phase screening process was employed. The first phase involved screening titles.  
33  
34 Citations that passed the first phase were evaluated for relevance based on their abstracts.  
35  
36 Finally, those that passed the abstract screen were evaluated for content based on the full-text.  
37  
38 The multi-phase screening process was completed independently by two reviewers, CSD and  
39  
40 DL. The chance agreement corrected inter-rater reliability was 0.92. Articles for which there  
41  
42 were rater disagreements were discussed until consensus was reached.  
43  
44  
45

46 The following eligibility criteria were used in each phase:

- 47  
48 1. The study reported on medically certified sickness absences due to mental  
49  
50 disorders.
- 51  
52 2. The study sample is not from a select (i.e., clinical trial) population.
- 53  
54 3. The study analyzed data that were collected in the year 2000 or later.
- 55  
56 4. The study reported on sickness absence outcomes directly related to a  
57  
58 specific absence.

1  
2  
3  
4  
5  
6  
7  
8  
9  
10  
11  
12  
13  
14  
15  
16  
17  
18  
19  
20  
21  
22  
23  
24  
25  
26  
27  
28  
29  
30  
31  
32  
33  
34  
35  
36  
37  
38  
39  
40  
41  
42  
43  
44  
45  
46  
47  
48  
49  
50  
51  
52  
53  
54  
55  
56  
57  
58  
59  
60

Sickness absence outcomes considered for this review included length of sickness absence, not returning to work (i.e., quitting, retiring), transitioning to long term disability, returning to work, and sickness absence recurrence.

Because the 1990s was a period of global change in disability policies and accounting for publication lag, the year 2002 was used as an inclusion starting point.<sup>7</sup> We focused on the last decade because there were relatively fewer policy changes related to workers during this time. Studies using pre-2000 data were excluded because pre-2000 data were collected within systems that existed before many of the 1990s policy changes.

### Quality Assessment

Articles that passed the three-stage screening process were then assessed for quality using the following criteria:

1. The study population is well described.
2. The data source is well described.
3. The study sample is representative of all workers in the context.
4. Mental disorders are included and reported.
5. The system of diagnosis/classification is described.
6. The sickness absence criteria are reported (i.e., pre-sickness absence days to qualify for sickness absence).
7. Sickness absence outcome measures are defined.
8. Analytical methods are described.
9. Uncertainty of estimates are reported.
10. The stated research objective is met.

One point was awarded for each criterion that was met; the maximum score was 10.

Total scores between 1 and 4 points were categorized as *fair/weak* quality, those between 5 and 8 points were *good* and those between 9 and 10 points were *excellent* quality.

## RESULTS

### Description of Inclusion and Exclusion

The electronic literature search resulted in the identification of 3,820 unique citations (Figure 1). From these, 24 entries that were commentaries were excluded. Based on the title review, 3,577 citations were excluded. During the abstract review, another 151 citations were excluded; this left 64 articles for full-text review. After the full-text review, 10 articles remained and their reference lists were hand searched for relevant studies. Four articles were identified in the hand search process but all were excluded during full-text review. Reasons for article exclusions were because they: (1) used pre-2000 data (n = 11), (2) did not report sickness absence outcomes directly related to a specific absence (n = 3), (3) were based on select populations (n = 44).

-----  
Insert Figure 1  
-----

### Quality Assessment

Upon quality assessment, 5 of the 10 studies were rated as *excellent* and the remaining 5 as *good* (Supplementary File 2 - Quality Assessment). The identified limitations of these studies included: non-representativeness of the working population (n = 10), outcome measure not defined (n = 4), and uncertainty of the estimate not reported (n = 3).

### Overview of the Studies

Table 1 contains the descriptions of the included studies. All of the included studies used administrative data from either an employer, insurer or occupational healthcare provider. As a result, none of the studies relied on self-report. They were based on objective data to identify populations of people with a sickness absence.

1  
2  
3 Of the 10 included studies, five were from the Netherlands. Two were from Brazil, two  
4 were from Canada and another from the UK. Seven of the studies used data from single  
5 employers. The employers in the studies represented a variety of sectors in several countries  
6 including a Dutch national postal service and a telecommunication company,<sup>8-10</sup> a Brazilian  
7 hospital,<sup>11</sup> a Canadian resource sector organization<sup>6 12</sup> and a British police force.<sup>13</sup> The four  
8 exceptions were Barbosa-Branco et al.<sup>14</sup> whose study included all Brazilian workers in registered  
9 private sector companies. In addition, Koopman et al.<sup>15</sup> and Roelen et al.<sup>16</sup> based their studies on  
10 data from an occupational health provider representing a broad spectrum of firms across the  
11 Netherlands.  
12  
13  
14  
15  
16  
17  
18  
19  
20  
21  
22  
23

24 All of the studies except one indicated that they used the International Classification of  
25 Diseases (ICD) to identify type of disorder. Of those that used the ICD, eight of the studies were  
26 based on the 10<sup>th</sup> edition and one on the 8<sup>th</sup> edition. One study<sup>15</sup> did not describe the disorder  
27 classification system it employed. However, because it used ArboNed data that were also used  
28 by Roelen et al.,<sup>16</sup> it might be assumed that ICD codes were also used in this study.  
29  
30  
31  
32  
33  
34  
35

36 Among the studies, there was variability in the scope of the primary diagnoses associated  
37 with the sickness absences that were included. However, there were similarities with respect to  
38 the inclusion of depressive and anxiety disorders and stress-related disorders. Thus, there  
39 appeared to be consistency among the studies with regard to a core set of mental disorders.  
40  
41  
42  
43  
44  
45

46 There was variation with regard to the number of absence days needed to qualify for  
47 sickness absence benefits. The number of days ranged from one to three weeks.  
48  
49  
50  
51  
52  
53  
54  
55  
56  
57  
58  
59  
60

**Table 1. Overview of Studies**

| Author(s)                    | Country | Study Population                                                                                                                                               | Data Source(s)                                                                                                                 | Years of Data | Diagnostic Classification System Used                                       | Sickness Absence Benefit Definition                                                                            | Outcomes                                                                                                       |
|------------------------------|---------|----------------------------------------------------------------------------------------------------------------------------------------------------------------|--------------------------------------------------------------------------------------------------------------------------------|---------------|-----------------------------------------------------------------------------|----------------------------------------------------------------------------------------------------------------|----------------------------------------------------------------------------------------------------------------|
| Barbosa-Branco et al. (2012) | BR      | All employees in registered private sector jobs in 2008 who a sickness absence                                                                                 | Brazilian National Social Security Administrative Databases: National Benefits System and National Social Information Database | 2008          | International Classification of Diseases, 10 <sup>th</sup> edition (ICD-10) | Sickness absence = $\geq 15$ medically certified consecutive days absent                                       | Duration of sickness benefit claim (calendar vs work days not specified)                                       |
| Board & Brown (2011)         | UK      | Study sample consisted of all employees of one police force who had $\geq 1$ episode of long-term sickness absence (LTSA) between Nov 1, 2000 and Oct 31, 2002 | Employer electronic absenteeism record administrative data                                                                     | 2000-2002     | International Classification of Diseases, 8 <sup>th</sup> edition (ICD-8)   | Long-term sickness absence = medically certified sickness absence episodes $\geq 28$ consecutive calendar days | Return to work by type of sickness absence episode (sub-acute or chronic)                                      |
| Dewa et al. (2010)           | CA      | Employees from one large resource sector company from 2003-2006 who had a sickness absence                                                                     | Employer administrative sickness absence data                                                                                  | 2003-2006     | ICD-10                                                                      | Sickness absence = medically certified sickness absence of $\geq 5$ continuous work days                       | Mean work days per sickness absence episode                                                                    |
| Dewa et al. (2011)           | CA      | Employees from one large resource sector company from 2003-2006 who had a sickness absence                                                                     | Employer administrative sickness absence data                                                                                  | 2003-2006     | ICD-10                                                                      | Sickness absence = medically certified sickness absence of $\geq 5$ continuous work days                       | Sickness absence free days                                                                                     |
| Koopmans et al. (2008)       | NL      | Employees of firms who were clients of one occupational health services provider from April 2002 – November 2005 who had a sickness absence.                   | Administrative sickness absence data from one occupational health service provider (ArboNed)                                   | 2002-2005     | Not described                                                               | Not described                                                                                                  | Return to work<br>Duration of absence calendar days                                                            |
| Koopmans et al. (2010)       | NL      | Dutch Post and Telecommunication employees from 2001-2007 who had a sickness absence due to a common mental disorder since Jan 1, 2001 or date of employment   | Administrative sickness absence data from one occupational health service provider (ArboNed)                                   | 2001-2007     | ICD-10                                                                      | Sick leaves of $> 3$ weeks require a medical certificate from an occupational physician                        | Duration of sickness absence days (calendar vs work days not specified)<br>Days to sickness absence recurrence |

| Author(s)             | Country | Study Population                                                                                                                          | Data Source(s)                                                                               | Years of Data | Diagnostic Classification System Used | Sickness Absence Benefit Definition                                                                             | Outcomes                                                                                                                                                                                                                                                                      |
|-----------------------|---------|-------------------------------------------------------------------------------------------------------------------------------------------|----------------------------------------------------------------------------------------------|---------------|---------------------------------------|-----------------------------------------------------------------------------------------------------------------|-------------------------------------------------------------------------------------------------------------------------------------------------------------------------------------------------------------------------------------------------------------------------------|
| Koopman et al. (2011) | NL      | Dutch Post and Telecommunication employees from 2001-2007 who had a sickness absence due to a common mental disorder                      | Administrative sickness absence data from one occupational health service provider (ArboNed) | 2001-2007     | ICD-10                                | Sick leaves of > 3 weeks require a medical certificate from an occupational physician                           | Duration of sickness episodes<br><br>Median duration in months until recurrence of sickness absence<br><br>Days to sickness absence recurrence<br><br>Recurrence = the start of at least one new episode of sickness absence after complete return to work for $\geq 28$ days |
| Reis et al. (2011)    | BR      | Workers who worked $\geq 20$ hours/week from one university hospital who were employed from 2000-2007 who had at least 1 sickness absence | Administrative data from employer human resources department                                 | 2000-2007     | ICD-10                                | Not described                                                                                                   | Median calendar days per sickness absence<br><br>Recurrence density of sickness absence episodes/100 worker-months                                                                                                                                                            |
| Roelen et al. (2009)  | NL      | Employees of firms who were clients of an occupational health services provider from 2001-2007 who had a sickness absence                 | Administrative sickness absence data from one occupational health service provider (ArboNed) | 2001-2007     | ICD-10                                | Sickness absence: absence of $\geq 28$ sick days requiring a medical certificate from an occupational physician | Median number of calendar days of sickness absence episodes/100 employees                                                                                                                                                                                                     |
| Roelen et al. (2010)  | NL      | Dutch Post and Telecommunication employees from 2001-2007 who had a sickness absence                                                      | Administrative sickness absence data from one occupational health service provider (ArboNed) | 2001-2007     | ICD-10                                | Sick leaves of > 3 weeks require a medical certificate from an occupational physician.                          | Median duration of sickness absence in days (type of day not specified)<br><br>Recurrence density of sickness absence/1,000 worker-years<br><br>Days to recurrence                                                                                                            |

### Sickness Absence Outcomes

The outcomes reported by the studies could be grouped into two general categories. The

1  
2  
3 first outcome category includes studies that examined whether and when a worker returned to  
4 work. They included RTW indicators and sickness absence duration. The second category of  
5  
6 outcomes focused on sickness absence recurrence. These recurrence outcomes reflected the rates  
7  
8 of sickness absence recurrence as well as the time between sickness absence episodes.  
9  
10

11  
12 Outcomes focusing on Return-to-Work. Three studies reported the rates of RTW (Table  
13  
14 2). Koopmans et al.<sup>15</sup> observed that of workers who had sickness absences due to depression,  
15  
16 66% returned to work within a year. Board and Brown<sup>13</sup> found that among their police force,  
17  
18 85% of police officers who had a sickness absence returned to work.  
19  
20

21  
22 *Duration of sickness absence.* Duration of sickness absence was measured using three  
23  
24 types of days – calendar days, work days and unspecified types of days. Sickness absence days  
25  
26 were reported using two statistics – the mean days and the median days. The values of the mean  
27  
28 and the median become equivalent when a distribution is symmetric (e.g., the normal  
29  
30 distribution). From the Netherland studies, the median days of absence duration were between  
31  
32 79 and 119 days.<sup>8-10 15 16</sup> In addition, there were changes in the median number of days over time  
33  
34 such that they seemed to decrease between 2001 and 2007.<sup>16</sup> From Brazil, Reis et al.<sup>11</sup> reported a  
35  
36 duration of 5-7 calendar days. Using Canadian data, Dewa et al.<sup>6</sup> reported a mean absence  
37  
38 episode of 65 work days. From the UK, Board and Brown<sup>13</sup> found that 43-60% of the workers  
39  
40 they observed had a sickness absence episode that was between 28-90 days; about 41-57% had  
41  
42 sickness absence episodes that lasted more than 90 days.  
43  
44  
45  
46  
47  
48  
49  
50  
51  
52  
53  
54  
55  
56  
57  
58  
59  
60



**Table 2. Return-to-Work Sickness Absence Outcomes**

| Author(s)                    | Country      | Mental Disorders                                                                                                                                                                                                                                                                                | Outcome Measure                                                                                                                                    | Number of episodes or employees                                                                                  | Reported Outcomes of Sickness Absences                                                                                                                                                                                                                                                                                                                                |
|------------------------------|--------------|-------------------------------------------------------------------------------------------------------------------------------------------------------------------------------------------------------------------------------------------------------------------------------------------------|----------------------------------------------------------------------------------------------------------------------------------------------------|------------------------------------------------------------------------------------------------------------------|-----------------------------------------------------------------------------------------------------------------------------------------------------------------------------------------------------------------------------------------------------------------------------------------------------------------------------------------------------------------------|
| Barbosa-Branco et al. (2012) | BR           | Mental and behavioural disorders: Organic disorders (ICD-10 F00-F09); psychoaffective substance use disorders (ICD-10 F10-F19); schizophrenia, schizotypal and delusional disorders (ICD-10 F20-F29); mood disorders (ICD-10 F30-F39); stress-related and somatoform disorders (ICD-10 F40-F48) | Duration of sickness benefit claim = measure not described                                                                                         | Number of claims due to mental and behavioural disorders:<br>All = 147,105<br>Males = 71,195<br>Females = 75,910 | Median duration of disability episodes (in days) (1 <sup>st</sup> and 3 <sup>rd</sup> quartiles):<br>Males:<br>Mental and behavioural disorders = 76 (47, 113)<br>Females:<br>Mental and behavioural disorders = 65 (43, 97)                                                                                                                                          |
| Board and Brown (2011)       | UK           | ICD categories used not described                                                                                                                                                                                                                                                               | Absence phase:<br>Sub-acute = 28-90 days<br>Chronic phase = > 90 days<br>Return-to-Work = episode has start and finish dates before study end date | Number of sickness absences:<br>Police officers = 4,485<br>Civilian staff = 1,761                                | Among those with mental ill health:<br>Police officers:<br>With sub-acute episode = 43.2%<br>With chronic episode = 56.8%<br>Who return to work = 85.2%<br>Civilian staff:<br>With sub-acute episode = 59.5%<br>With chronic episode = 40.5%<br>Who return to work = Not reported                                                                                     |
| Dewa et al. (2010)           | CA (Ontario) | Mental and behavioural disorders (ICD-10 F00-F99, Z502, Z503, Z561-Z566, Z630-Z639, Z729, Z733, Z738, Z864, Z915): schizophrenia, mood disorders, stress-related disorders and mental and behavioral disorders due to psychoactive substance use                                                | Duration of episode = number of work days absent                                                                                                   | Number of sickness absences:<br>Due to any disorder = 4,791<br>Due to mental and behavioural disorders = 698     | Mean days per episode (in days) (95% Confidence Interval):<br>Due to any disorder = 33.0 (31.3, 34.7)<br>Due to mental and behavioural disorders:<br>All = 64.9 (58.2, 71.6)<br>Males = 62.1 (54.1, 70.1)<br>Females = 70.0 (57.8, 82.1)                                                                                                                              |
| Koopmans et al. (2008)       | NL           | Depression (Diagnostic classification system not described in paper)                                                                                                                                                                                                                            | Duration of episode = number of calendar days between first day of sick leave and date of return to work or disability pension received            | Number of new episodes due to depression = 9,910                                                                 | Return to work within a year:<br>Men = 67.7%<br>Women = 64.8%<br>Total = 66.2%<br>One year of work incapacity:<br>Men = 15.2%<br>Women = 17.4%<br>Total = 16.4%<br>Mean duration of episode (in days) (95% CI):<br>Men = 200 (196, 204)<br>Women = 213 (210, 217)<br>Median duration of episode (in days) (95% CI):<br>Men = 179 (172, 186)<br>Women = 201 (193, 209) |

| Author(s)              | Country | Mental Disorders                                                                                                                                                                                                                                                          | Outcome Measure                                                                                                                         | Number of episodes or employees                                                                                                    | Reported Outcomes of Sickness Absences                                                                                                                                                                                                                                                                                                                                                                                                                                                                                                                                                |
|------------------------|---------|---------------------------------------------------------------------------------------------------------------------------------------------------------------------------------------------------------------------------------------------------------------------------|-----------------------------------------------------------------------------------------------------------------------------------------|------------------------------------------------------------------------------------------------------------------------------------|---------------------------------------------------------------------------------------------------------------------------------------------------------------------------------------------------------------------------------------------------------------------------------------------------------------------------------------------------------------------------------------------------------------------------------------------------------------------------------------------------------------------------------------------------------------------------------------|
| Koopmans et al. (2010) | NL      | Common mental disorders (CMD) from medical certification: stress-related (distress and adjustment disorders) (ICD-10 R45, F43) and psychiatric (mild to moderate depressive and anxiety disorders) (ICD-10 F32.0, F32.1, F40.0, F40.1, F40.2, F41.0, F41.1, F41.2, F41.3) | Duration of sickness absence = number of calendar days between first day of return to work or disability pension received               | Number of employees with $\geq 1$ sickness absence due to CMD = 8,951<br><br>Total number of sickness absence due to CMD = 10,921  | From 2001-2007, median duration of index sickness absence episode (in days) (95% CI):<br><br>Men:<br>Stress = 49 (47, 51)<br>Psychiatric = 168 (150, 186)<br>Total CMD = 57 (54, 60)<br><br>Women:<br>Stress = 56 (53, 59)<br>Psychiatric = 168 (151, 185)<br>Total CMD = 67 (63, 71)<br><br>From 2001-2007, median duration of recurrent CMD sickness absence episodes (in days) (95% CI):<br><br>Men:<br>Stress = 46 (41, 51)<br>Psychiatric = 68 (39, 97)<br>Total CMD = 48 (43, 53)<br><br>Women:<br>Stress = 60 (51, 69)<br>Psychiatric = 73 (53, 93)<br>Total CMD = 62 (55, 69) |
| Koopmans et al. (2011) | NL      | Common mental disorders (CMD) from medical certification: stress-related (distress and adjustment disorders) (ICD-10 R45, F43) and psychiatric (mild to moderate depressive and anxiety disorders) (ICD-10 F32, F40, F41)                                                 | Duration of sickness absence = number of calendar days of sickness absence adjusted for partial return to work and annual worker- years | Number of employees with $\geq 1$ sickness absence due to CMD = 9,904<br><br>Total number of sickness absences due to CMD = 12,404 | From 2001-07, duration of sickness absence episode due to CMD (in calendar days) (95% CI):<br><br>Total = 62 (60, 64)<br>Men = 57 (55, 59)<br>Women = 68 (65, 71)                                                                                                                                                                                                                                                                                                                                                                                                                     |
| Reis et al. (2011)     | BR      | Mental and behavioral disorders (ICD-10 F00-F99)                                                                                                                                                                                                                          | Duration of episode = Number of calendar days absent from work                                                                          | Number of sickness absence episodes:<br><br>Due to any disorder = 5,138<br><br>Due to mental and behavioural disorders = 324       | Median duration of sickness absence leave (in days):<br><br>First episode:<br>Due to any disorder = 2<br>Due to mental and behavioural disorders = 5<br><br>Recurrent episodes:<br>Due to any disorder = 2<br><br>Due to mental and behavioural disorders = 7                                                                                                                                                                                                                                                                                                                         |

| Author(s)            | Country | Mental Disorders                                                                                                                                                                            | Outcome Measure                                                                                                                         | Number of episodes or employees                                                                                                                                                                                                                                                                                                                                     | Reported Outcomes of Sickness Absences                                                                                                                                                                                                                                                                                                                                                                                                                               |
|----------------------|---------|---------------------------------------------------------------------------------------------------------------------------------------------------------------------------------------------|-----------------------------------------------------------------------------------------------------------------------------------------|---------------------------------------------------------------------------------------------------------------------------------------------------------------------------------------------------------------------------------------------------------------------------------------------------------------------------------------------------------------------|----------------------------------------------------------------------------------------------------------------------------------------------------------------------------------------------------------------------------------------------------------------------------------------------------------------------------------------------------------------------------------------------------------------------------------------------------------------------|
| Roelen et al. (2009) | NL      | Mental and behavioral disorders (ICD-10 R45, F43, F32, F40 and F41) from medical certification: emotional disturbance, depressive disorders, anxiety disorders and stress-related disorders | Duration of sickness absence = calendar days between the first and last day of sickness absence                                         | Number of sickness absence episodes:<br><br>Due to any disorder:<br>2001 = 90,095<br>2002 = 104,193<br>2003 = 118,926<br>2004 = 129,024<br>2005 = 128,044<br>2006 = 108,901<br>2007 = 96,482<br><br>Due to mental and behavioural disorders:<br>2001 = 21,140<br>2002 = 22,803<br>2003 = 24,917<br>2004 = 27,533<br>2005 = 22,682<br>2006 = 20,013<br>2007 = 18,513 | Median duration of sickness absence episodes (in days) (95% CI):<br><br>Due to any disorder:<br>2001 = 73 (72, 74)<br>2002 = 63 (62, 64)<br>2003 = 57 (56, 58)<br>2004 = 53 (53, 53)<br>2005 = 45 (45, 45)<br>2006 = 49 (48, 50)<br>2007 = 55 (54, 56)<br><br>Due to mental and behavioural disorders:<br>2001 = 119 (116, 122)<br>2002 = 98 (96, 100)<br>2003 = 87 (85, 89)<br>2004 = 80 (79, 81)<br>2005 = 79 (77, 81)<br>2006 = 83 (81, 85)<br>2007 = 87 (85, 89) |
| Roelen et al. (2010) | NL      | Mental and behavioral disorders (ICD-10 F00-F99) from medical certification                                                                                                                 | Duration of sickness absence = number of days between first day of sick leave and date of return to work or disability pension received | Number of employees with $\geq 1$ sickness absence = 36,342<br><br>Number of employees with $\geq 1$ sickness absence due to mental and behavioural disorders = 7,197<br><br>Number of employees with $> 1$ sickness absence due to mental and behavioural disorders = 1,400<br><br>Worker-years = 363,461                                                          | Median duration of sickness absence (in days) (95% CI):<br><br>Mental and behavioural disorders = 62 (55, 69)<br><br>Any disorder = 35 (34, 36)                                                                                                                                                                                                                                                                                                                      |

Four of the studies compared sickness absence episode duration for those related to mental disorders versus those for other disorders. The findings among the four studies were consistent; episodes for mental disorders were longer than episodes related to other types of disorders. For instance, Roelen et al.<sup>10</sup> reported that while the median duration of a mental disorder related episode was 62 days, it was 35 days for any type of episode. In addition, this

1  
2  
3 pattern appeared to be consistent from 2001 to 2007.<sup>16</sup> Among their Canadian energy sector  
4  
5 workers, Dewa et al.<sup>6</sup> found that the mean number of work days of an episode related to a mental  
6  
7 disorder was almost double that of an episode related to other types of disorders (65 days versus  
8  
9 33 days). Reis et al.<sup>11</sup> reported similar patterns among their sample of Brazilian healthcare  
10  
11 workers.  
12  
13

14  
15 Outcomes Focusing on Sickness Absence Recurrence. Three of the studies reported rates  
16  
17 of sickness absence recurrence related to a mental disorder (Table 3). Roelen et al.<sup>10</sup> reported  
18  
19 recurrence rates of 80/1000 worker-years for mental and behavioural disorders as opposed to  
20  
21 82/1000 worker-years for any disorder. Reis et al.<sup>11</sup> found rates of 7/100 worker-months for  
22  
23 mental and behavioural disorders and 17/100 worker-months for any disorder. In addition,  
24  
25 Koopmans et al.<sup>9</sup> observed mental disorder sickness absence recurrence rates of 76/1000 worker-  
26  
27 years for men and 79/1000 worker-years for women. They also found that 18% of workers with  
28  
29 at least one sickness absence episode had a recurrent episode.<sup>9</sup>  
30  
31  
32  
33

34 **Table 3. Recurrence Sickness Absence Outcomes**

| Author(s)          | Country      | Mental Disorders                                                                                                                                                                                                                                 | Outcome Measure                                                                                   | Number of episodes or employees                                                                                                           | Reported Outcomes of Sickness Absences                                                                                                                               |
|--------------------|--------------|--------------------------------------------------------------------------------------------------------------------------------------------------------------------------------------------------------------------------------------------------|---------------------------------------------------------------------------------------------------|-------------------------------------------------------------------------------------------------------------------------------------------|----------------------------------------------------------------------------------------------------------------------------------------------------------------------|
| Dewa et al. (2011) | CA (Ontario) | Mental and behavioural disorders (ICD-10 F00-F99, Z502, Z503, Z561-Z566, Z630-Z639, Z729, Z733, Z738, Z864, Z915): schizophrenia, mood disorders, stress-related disorders and mental and behavioral disorders due to psychoactive substance use | Disability free days = number of between end of first episode and beginning of subsequent episode | Number of employees with $\geq 1$ sickness absence episode:<br><br>Due to mental disorders = 422<br><br>Due to physical disorders = 3,171 | Median disability free days (standard error):<br><br>Previous episode for mental disorders = 673 (79.8)<br><br>Previous episode for physical disorders = 1053 (48.6) |

| Author(s)              | Country | Mental Disorders                                                                                                                                                                                                                                                          | Outcome Measure                                                                                                                                                                                                                                                                                                             | Number of episodes or employees                                                                                                                      | Reported Outcomes of Sickness Absences                                                                                                                                                                                                                                                                                                                                                                                                                                                                                                                                                                                                                                                                                                                                                                                         |
|------------------------|---------|---------------------------------------------------------------------------------------------------------------------------------------------------------------------------------------------------------------------------------------------------------------------------|-----------------------------------------------------------------------------------------------------------------------------------------------------------------------------------------------------------------------------------------------------------------------------------------------------------------------------|------------------------------------------------------------------------------------------------------------------------------------------------------|--------------------------------------------------------------------------------------------------------------------------------------------------------------------------------------------------------------------------------------------------------------------------------------------------------------------------------------------------------------------------------------------------------------------------------------------------------------------------------------------------------------------------------------------------------------------------------------------------------------------------------------------------------------------------------------------------------------------------------------------------------------------------------------------------------------------------------|
| Koopmans et al. (2010) | NL      | Common mental disorders (CMD) from medical certification: stress-related (distress and adjustment disorders) (ICD-10 R45, F43) and psychiatric (mild to moderate depressive and anxiety disorders) (ICD-10 F32.0, F32.1, F40.0, F40.1, F40.2, F41.0, F41.1, F41.2, F41.3) | <p>Recurrence density = number of employees with recurrent episodes by the worker-years in the sub-population of men and women with a previous episode of sickness absence due to a CMD</p> <p>New episodes = &gt; 28 days apart</p> <p>Worker-years = years of coverage from index episode to end of employment period</p> | <p>Number of employees with <math>\geq 1</math> sickness absence due to CMD = 8,951</p> <p>Total number of sickness absence due to CMD = 10,921</p>  | <p>From 2001-2007, episodes per worker with <math>\geq 1</math> sickness absence related to CMD:</p> <p>1 episode = 82%</p> <p>2 episodes = 14%</p> <p>3 episodes = 3%</p> <p><math>\geq 4</math> episodes = 1%</p> <p>From 2001-07, CMD recurrence densities/1,000 worker-years (95% CI):</p> <p>Men:<br/>Stress = 74.4 (72.9, 76.0)<br/>Psychiatric = 83.8 (71.9, 95.7)<br/>Total CMD = 75.6 (70.7, 80.4)</p> <p>Women:<br/>Stress = 78.4 (75.9, 80.9)<br/>Psychiatric = 78.9 (64.1, 93.7)<br/>Total CMD = 78.5 (72.4, 84.6)</p> <p>From 2001-07, CMD sickness absence median time to onset recurrence (in months) (95% CI):</p> <p>Men:<br/>Stress = 11 (11, 13)<br/>Psychiatric = 12 (8, 15)<br/>Total CMD = 11 (10, 13)</p> <p>Women:<br/>Stress = 11 (9, 12)<br/>Psychiatric = 10 (8, 12)<br/>Total CMD = 10 (9, 12)</p> |
| Koopmans et al. (2011) | NL      | Common mental disorders (CMD) from medical certification: stress-related (distress and adjustment disorders) (ICD-10 R45, F43) and psychiatric (mild to moderate depressive and anxiety disorders) (ICD-10 F32, F40, F41)                                                 | <p>Recurrence density = number of employees with recurrent episodes by the worker-years in the sub-population of men and women with a previous episode of sickness absence due to a CMD</p> <p>Worker-years = years of coverage from index episode to end of employment period</p>                                          | <p>Number of employees with <math>\geq 1</math> sickness absence due to CMD = 9,904</p> <p>Total number of sickness absences due to CMD = 12,404</p> | <p>From 2001-07, CMD sickness absence median time to onset recurrence (in months) (95% CI):</p> <p>Total = 10 (10, 11)<br/>Distress symptoms = 11 (10, 12)<br/>Adjustment disorder = 11 (9, 12)<br/>Depressive symptoms = 10 (7, 12)<br/>Anxiety symptoms = 10 (7, 14)<br/>Other CMD disorders = 8 (6,9)</p>                                                                                                                                                                                                                                                                                                                                                                                                                                                                                                                   |

| Author(s)            | Country | Mental Disorders                                                            | Outcome Measure                                                                                                                                                                                        | Number of episodes or employees                                                                                                                                                                                                                                                                | Reported Outcomes of Sickness Absences                                                                                                                                                                                                                                                                |
|----------------------|---------|-----------------------------------------------------------------------------|--------------------------------------------------------------------------------------------------------------------------------------------------------------------------------------------------------|------------------------------------------------------------------------------------------------------------------------------------------------------------------------------------------------------------------------------------------------------------------------------------------------|-------------------------------------------------------------------------------------------------------------------------------------------------------------------------------------------------------------------------------------------------------------------------------------------------------|
| Reis et al. (2011)   | BR      | Mental and behavioral disorders (ICD-10 F00-F99)                            | Duration of episode = Number of calendar days absent from work<br>Recurrence density = number of recurrent sickness absences divided by total worker-time at risk for the subsequent sickness absences | Number of sickness absence episodes:<br>Due to any disorder = 5,138<br>Due to mental and behavioural disorders = 324                                                                                                                                                                           | Recurrence density/100 worker-months:<br>Due to any disorder = 17.37<br>Due to mental and behavioural disorders = 6.72                                                                                                                                                                                |
| Roelen et al. (2010) | NL      | Mental and behavioral disorders from medical certification (ICD-10 F00-F99) | Recurrence density = number of employees with recurrent episodes by the worker-years in the sub-population of men and women with a previous episode of sickness absence                                | Number of employees with $\geq 1$ sickness absence = 36,342<br>Number of employees with $\geq 1$ sickness absence due to mental and behavioural disorders = 7,197<br>Number of employees with $> 1$ sickness absence due to mental and behavioural disorders = 1,400<br>Worker-years = 363,461 | From 2001-2007,<br>Recurrence density/1,000 worker-years (95% CI):<br>Mental and behavioural disorders = 80.4 (74.9, 86.0)<br>Any disorder = 81.6 (79.1, 84.0)<br>Median days to recurrence (in days) (95% CI):<br>Mental and behavioural disorders = 328 (284, 372)<br>Any disorder = 384 (367, 401) |

*Time between Sickness Absence Episodes.* Four studies reported the time between episodes related to mental disorders. Koopmans et al.<sup>8</sup> found that the median time was 10 months. In addition, Koopmans et al.<sup>9</sup> observed the median lengths of episode free-months were similar for men (11 months) and women (10 months).

Roelen et al.<sup>10</sup> compared lengths of episode free-days for those related to mental disorders versus those related to any disorder. They found the median length of episode free days was longer for workers who had a previous sickness absence episode for any disorder (384 days) versus those who had a previous episode related to a mental disorder (328 days). Dewa et al.<sup>12</sup> also observed a longer period of sickness absence free days for workers who had a previous sickness absence episode related to a physical disorder (1053 days) than those who had a previous sickness absence episode related to a mental disorder (673 days).

## DISCUSSION

Based on the existing literature, from the employer's perspective, what are the relevant economic return-to-work outcomes for sickness absences related to mental disorders? The results of the 10 studies could be grouped into two general outcome categories: (1) outcomes focusing on return-to-work and (2) outcomes focusing on sickness absence recurrence.

Two of the included studies that looked at RTW outcomes indicated that the majority of workers who have a sickness absence return to work at the end of the absence.<sup>13 15</sup> This trend is consistent with early studies that indicated a large proportion of workers return to work at the end of their absence.<sup>17 18</sup> This suggests that retention of workers may not be one of the major burdens associated with sickness absence. It also raises the question of what happens to workers who do not return to work at the end of their sickness absence. This is particularly salient for North American (i.e., United States and Canada) employers who offer long-term work disability benefits to their workforces. Although a small group, workers who receive long-term disability benefits after reaching the limits of their sickness absence benefits could represent high costs. One estimate suggested that it could cost CAN \$80,000 per long-term disability claim.<sup>5</sup>

The results of the studies suggest that sickness absence duration ranges from 5-119 days. The variation among the estimates may reflect the variation among the sickness benefit schemes of the jurisdictions in which the studies were conducted. However, there were consistencies among a number of reported patterns. For example, the numbers of sickness absence days related to mental disorders were greater than those for physical disorders in the four studies that reported them.<sup>6 9 14 15</sup> In addition, compared to absences related to physical disorders, those related to mental disorders may be of greater length and in turn, burden.

With regard to sickness absence recurrence, the studies that calculated sickness absence

1  
2  
3 recurrence rates reported rates that ranged from 7/100 worker months to 80/1,000 worker-years.  
4  
5 While there is variation in the magnitudes of the reported rates, two studies also indicated that  
6  
7 the time between a sickness absence recurrence is consistently longer for workers who had a past  
8  
9 sickness absence related to a physical disorder versus a mental disorder. However, while the  
10  
11 pattern seemed to be consistent, the median numbers of sickness absence free days were two to  
12  
13 three times greater in Dewa et al.'s<sup>12</sup> study than Roelen et al.'s.<sup>10</sup> Because workers within the  
14  
15 respective studies are exposed to the same sickness benefit scheme, the differences within the  
16  
17 studies suggest there may be other potential contributors to the differences than solely the  
18  
19 sickness benefit scheme. There is an opportunity for future research to explore the role that  
20  
21 individual (e.g., the chronic nature of mental disorders), occupational (e.g., job characteristics)  
22  
23 and environmental (e.g., workplace stigma) factors play in the differences in the recurrence of  
24  
25 physical versus mental disorder related sickness absences.  
26  
27  
28  
29  
30

31  
32 These results also suggest that although most workers return to work, they also may be at  
33  
34 risk of a repeat sickness absence episode. Indeed, the literature suggests that mental disorders  
35  
36 such as depression are chronic in nature and have a high recurrence rate.<sup>19-21</sup> However, does  
37  
38 symptom relapse automatically necessitate an accompanying sickness absence? Given that work  
39  
40 disability is not solely a medical problem, there have been suggestions that the prognosis need  
41  
42 not be fatalistic; sickness absence is not always required. For example, workplace  
43  
44 accommodations could help workers experiencing an episode of mental illness continue to work  
45  
46 during an episode.<sup>22 23</sup> In addition, there is an emerging literature looking at the effectiveness of  
47  
48 interventions in decreasing sickness absence recurrence for mental disorders.<sup>24 25</sup> That is,  
49  
50 although there have been arguments for treating mental disorders as chronic illnesses, there have  
51  
52 been few intervention studies that have focused on decreasing sickness absence recurrence for  
53  
54  
55  
56  
57  
58  
59  
60



1  
2  
3 mental disorders.  
4

5  
6 This also points to one of the gaps in the literature. Few studies have estimated the  
7  
8 components of the cost of work reintegration and accommodation for workers with mental  
9  
10 disorders. None of the studies identified in this review examined the time it took for a worker to  
11  
12 completely reintegrate back into work. For example, how long is the work accommodation  
13  
14 period? Furthermore, how is productivity affected during the reintegration period? There is  
15  
16 evidence suggesting that there may be costs to the employer related to the process of  
17  
18 reintegrating a worker who has been absent because of a sickness episode.<sup>22 26 27</sup> There also is  
19  
20 evidence to suggest that employers and workers have identified work sustainability without  
21  
22 sickness absence recurrence as an important work outcome.<sup>28</sup> Given that work sustainability  
23  
24 without sickness absence recurrence seems to be a preference of both workers and employees  
25  
26 and there are potential costs related to reintegration and accommodation, it may be important to  
27  
28 consider the number of episodes (i.e., recurrence rates) as well as total number of absence days  
29  
30 alone. Few burden of illness studies for mental disorders have included the costs of recurrent  
31  
32 sickness absence in their estimates. But, recurrent sickness absence episodes seem to be a cost  
33  
34 that warrants consideration for inclusion in cost estimates as well as for intervention outcomes.  
35  
36  
37  
38  
39

40  
41 In addition, five of the 10 studies identified are from one country (the Netherlands) and  
42  
43 two population groups within that country. At the same time, the databases that were used  
44  
45 represented between 10,000 and 100,000 claims. Thus, the findings that emerge from these  
46  
47 databases build a compelling case that the length of sickness absence and its recurrence is a  
48  
49 burden on employers. However, the fact that the majority of the evidence is being generated by  
50  
51 one country raises interesting questions. Is the reason that the Netherlands and Northern Europe  
52  
53 are the sources of most of the intervention studies for sickness absences related to mental  
54  
55  
56  
57  
58  
59  
60

1  
2  
3 disorders because they have compelling data to make the case about the costs to employers? Are  
4  
5 the results from the Netherlands generalizable to other countries?  
6  
7

8 In addition to the Dutch studies, there were five other studies identified. However, these  
9  
10 studies actually represented a total of four population groups. Three of the datasets each  
11  
12 represented about 5,000 claims from single organizations (the studies from the UK, Canada and  
13  
14 one Brazilian study). The exception was the one Brazilian study that represented 140,000 claims  
15  
16 (all workers in registered private sector jobs). This suggests that there is an opportunity for the  
17  
18 evidence base to grow in these countries. It also begs the question, “What is known about the  
19  
20 sickness absence burden in other countries that were not represented in this search (i.e., the US,  
21  
22 the missing EU countries and Asia)?” Does the absence of studies from other countries indicate  
23  
24 that it is not a concern in the other countries? Or, is it an indication that awareness is yet to be  
25  
26 raised?  
27  
28  
29  
30

### 31 **Strengths and Limitations Related to Interpreting the Literature**

32

33  
34 There were a number of strengths of the current body of literature reviewed. First, all of  
35  
36 the data from the included studies used data from complete populations of people who had a  
37  
38 sickness absence. This minimizes the potential for selection bias within populations. However,  
39  
40 selection bias related to the population chosen is still a possibility. Indeed, there was variation in  
41  
42 the populations covered ranging from multiple to single organizations. Consequently, it will be  
43  
44 important for future work to examine whether the results are generalizable to different  
45  
46 populations.  
47  
48

49  
50 An additional strength of the included studies was that they used standardized diagnostic  
51  
52 classification systems. All included depressive and anxiety disorders as well as stress-related  
53  
54 disorders. However, there was variability in the other types of mental disorders considered. This  
55  
56  
57  
58  
59  
60

1  
2  
3 could have affected some of the reported results. At the same time, it should be noted that the  
4 majority of sickness absences related to mental disorders are attributable to depression, anxiety  
5 and stress-related disorders.<sup>29 30</sup> This suggests that inclusion of these disorders would capture a  
6 large proportion of the sickness absences related to mental disorders.  
7  
8  
9  
10  
11

12  
13 A limitation of the studies was the variation in the years from which the data were taken.  
14 Although all studies used post-2000, there could have been changes within systems that could  
15 have affected incidence rates. For example, in the Netherlands, extensive legislative changes  
16 occurred between 2000 and 2013 which affected rates.<sup>7 31</sup> In fact, the changes are reflected in the  
17 results reported by Roelen et al.<sup>16</sup> Similarly, changes could have been implemented in other  
18 countries such that results may not currently be generalizable.  
19  
20  
21  
22  
23  
24  
25  
26

27 Another limitation was variability in the sickness absence benefit schemes. That is, the  
28 variation in the length of sickness absence episodes in part could be related to the length of  
29 sickness absence coverage. The longer the coverage, the longer the absence may be. The  
30 frequency of sickness absence recurrence also could be affected by the benefit scheme. If there  
31 are limits on the number of sickness absence days that a worker is allowed annually, those  
32 workers could have fewer episodes than workers for whom limits do not exist.  
33  
34  
35  
36  
37  
38  
39  
40

### 41 **Strengths and Limitations of the Search Strategy**

42

43 Although five databases were used in the search, articles that did not appear in any of the  
44 databases could have been overlooked. This possibility was decreased due to the broad scope of  
45 each of the searched databases and the hand search. Another limitation is related to the fact that  
46 the search focused on articles published in English-language journals. However, despite the  
47 English-language constraint, the identified studies originated in European, North American and  
48 Latin American countries. This indicates that although they are not in countries where English is  
49  
50  
51  
52  
53  
54  
55  
56  
57  
58  
59  
60

1  
2  
3 the first language, at least some of these researchers publish in English-language journals.  
4

5 It should be noted that the sickness absence outcomes that have been studied are related  
6  
7 to the potential direct costs to employers. That is, because of the effect on work productivity,  
8  
9 employers will be interested in the length of sickness absences as well as recurrence of sickness  
10  
11 absence. However, from a societal perspective, this presents only part of picture. What happens  
12  
13 to workers who do not return to work? This is a question governments may want answered  
14  
15 especially if it means that those workers become enrolled in the public disability programs.<sup>32</sup>  
16  
17 Thus, future work should also examine this group of workers particularly if factors can be  
18  
19 identified that retain them in the labour market.  
20  
21  
22  
23

## 24 CONCLUSIONS

25  
26 This systematic literature review identified only 10 studies published in the last decade.  
27  
28 The results of these existing studies suggest that along with the incidence of sickness absence  
29  
30 related to mental disorders, the length and recurrence (i.e., frequency of recurrence and time  
31  
32 between recurrence) of these sickness absences should be areas of concern.  
33  
34

35  
36 This systematic review also highlights gaps in the literature. For instance, half of the  
37  
38 existing studies are from the Netherlands. That is, most of the literature in this area is based on  
39  
40 the Netherland's experience. This suggests that in other parts of the world, this area of research  
41  
42 is in its infancy. It will be important for research in other countries to look at the length and  
43  
44 sickness absence recurrence (i.e., frequency of recurrence and time between recurrences) of  
45  
46 sickness absences. This basic knowledge will help with understanding to what extent it should  
47  
48 be a concern for employers in other countries. In turn, it could also help to build the business  
49  
50 case for increased resources toward the development of more sickness absence interventions in  
51  
52 these other countries.  
53  
54  
55  
56  
57  
58  
59  
60

1  
2  
3 The results of this review also indicate that we are in the early stages of understanding the  
4 aspects of sickness absences that contribute to employer burden and along the same vein, areas to  
5 target to effectively decrease costs. For example, more research is needed regarding the costs of  
6 recurrence including the cost of reintegration and time to full reintegration. This suggests that  
7 current cost estimates may underestimate the costs of sickness absences from the employer's  
8 perspective. To effectively build the business case for employers to invest in interventions that  
9 target sickness absences related to mental disorders, it will be important to develop a more  
10 comprehensive picture of the costs associated with sickness absence that employers directly bear.  
11 Only in this way can economic evaluations and economic models accurately estimate the types  
12 of cost-savings that employers can expect with an intervention.  
13  
14  
15  
16  
17  
18  
19  
20  
21  
22  
23  
24  
25

#### 26 **DATA SHARING STATEMENT**

27 No additional data available  
28

#### 29 **FUNDING**

30 This work was funded by [one of the author's] Canadian Institutes of Health Research/Public  
31 Health Agency of Canada Applied Public Health Chair (FRN#:86895). Any views expressed or  
32 errors are the sole responsibility of the authors.  
33

#### 34 **COMPETING INTERESTS**

35 The authors declare that they have no competing interests.  
36

#### 37 **CONTRIBUTORSHIP STATEMENT**

38 CSD led the conception, design, data acquisition, analysis and interpretation of the data; she also  
39 led the writing of the overall manuscript. DL collaborated on the design, data acquisition and  
40 analysis; he contributed to the writing of the overall manuscript and led the writing of the  
41 Methods section. SB collaborated on the design and data acquisition and contributed to the  
42 writing of the manuscript. All authors are guarantors of the final manuscript.  
43  
44  
45  
46  
47  
48  
49  
50  
51  
52  
53  
54  
55  
56  
57  
58  
59  
60

## REFERENCES

1. Greenberg PE, Leong SA, Birnbaum HG, et al. The economic burden of depression with painful symptoms. *J Clin Psychiatry* 2003;64 Suppl 7:17-23.
2. Stephens T, Joubert N. The economic burden of mental health problems in Canada. *Chronic Dis Can* 2001;22(1):18-23.
3. Greenberg PE, Sisitsky T, Kessler RC, et al. The economic burden of anxiety disorders in the 1990s. *J Clin Psychiatry* 1999;60(7):427-35.
4. Stewart WF, Ricci JA, Chee E, et al. Cost of lost productive work time among US workers with depression. [Erratum appears in JAMA. 2003 Oct 22;290(16):2218]. *JAMA* 2003;289(23):3135-44.
5. Sairanen S, Matzanke D, Smeall D. The Business Case: Collaborating to Help Employees Maintain Their Mental Well-Being. *Healthcare Papers* 2011(11):78-84.
6. Dewa CS, Chau N, Dermer S. Examining the comparative incidence and costs of physical and mental health-related disabilities in an employed population. *J Occup Environ Med* 2010;52(7):758-62.
7. Organisation for Economic Cooperation and Development. *Transforming Disability into Ability: Policies to promote work and income security for disabled people*: OECD Publishing, 2003.
8. Koopmans PC, Bultmann U, Roelen CA, Hoedeman R, van der Klink JJ, Groothoff JW. Recurrence of sickness absence due to common mental disorders. *Int Arch Occup Environ Health* 2011;84(2):193-201.
9. Koopmans PC, Roelen CA, Bultmann U, et al. Gender and age differences in the recurrence of sickness absence due to common mental disorders: a longitudinal study. *BMC Public Health* 2010;10:426.
10. Roelen CA, Koopmans PC, Anema JR, et al. Recurrence of medically certified sickness absence according to diagnosis: a sickness absence register study. *J Occup Rehabil* 2010;20(1):113-21.
11. Reis RJ, Utzet M, La Rocca PF, et al. Previous sick leaves as predictor of subsequent ones. *Int Arch Occup Environ Health* 2011;84(5):491-9.
12. Dewa CS, Chen MC, Chau N, et al. Examining factors associated with the length of short-term disability-free days among workers with previous short-term disability episodes. *J Occup Environ Med* 2011;53(6):669-73.
13. Board BJ, Brown J. Barriers and enablers to returning to work from long-term sickness absence: Part I-A quantitative perspective. *Am J Ind Med* 2011;54(4):307-24.
14. Barbosa-Branco A, Bultmann U, Steenstra I. Sickness benefit claims due to mental disorders in Brazil: associations in a population-based study. *Cad Saude Publica* 2012;28(10):1854-66.
15. Koopmans PC, Roelen CAM, Groothoff JW. Sickness absence due to depressive symptoms. *Int Arch Occup Environ Health* 2008;81(6):711-19.
16. Roelen CA, Koopmans PC, Hoedeman R, et al. Trends in the incidence of sickness absence due to common mental disorders between 2001 and 2007 in the Netherlands. *Eur J Public Health* 2009;19(6):625-30.
17. Conti DJ, Burton WN. The economic impact of depression in a workplace. *J Occup Med* 1994;36(9):983-8.

18. Dewa CS, Goering P, Lin E, et al. Depression-related short-term disability in an employed population. *J Occup Environ Med* 2002;44(7):628-33.
19. Andrews G. Should depression be managed as a chronic disease? *BMJ* 2001;322(7283):419-21.
20. Burcusa SL, Iacono WG. Risk for recurrence in depression. *Clin Psychol Rev* 2007;27(8):959-85.
21. Kessler RC, Zhao S, Blazer DG, et al. Prevalence, correlates, and course of minor depression and major depression in the National Comorbidity Survey. *J Affect Disord* 1997;45(1-2):19-30.
22. Gates LB. Workplace Accommodation as a Social Process. *J Occup Rehabil* 2000;10(1):85-98.
23. Allen S, Carlson G. To conceal or disclose a disabling condition? A dilemma of employment transition *Journal of Vocational Rehabilitation* 2003;19(1/2003):19-30.
24. Arends I, van der Klink JJ, van Rhenen W, et al. Prevention of recurrent sickness absence in workers with common mental disorders: results of a cluster-randomised controlled trial. *Occup Environ Med* 2014;71(1):21-9.
25. Martin MH, Nielsen MB, Madsen IE, et al. Effectiveness of a coordinated and tailored return-to-work intervention for sickness absence beneficiaries with mental health problems. *J Occup Rehabil* 2013;23(4):621-30.
26. Freeman D, Cromwell C, Aarenau D, et al. Factors Leading to Successful Workplace Integration of Employees Who Have Experienced Mental Illness. *Employee Assistance Quarterly* 2004;19(4):51-58.
27. Tse S. What do employers think about employing people with experience of mental illness in New Zealand workplaces? *Work* 2004;23(3):267-74.
28. Hees HL, Nieuwenhuijsen K, Koeter MWJ, et al. Towards a New Definition of Return-to-Work Outcomes in Common Mental Disorders from a Multi-Stakeholder Perspective. *PLoS ONE* 2012;7(6).
29. Henderson M, Glozier N, Holland Elliott K. Long term sickness absence. *Br Med J* 2005;330(7495):802-3.
30. Roelen CA, Norder G, Koopmans PC, et al. Employees sick-listed with mental disorders: who returns to work and when? *J Occup Rehabil* 2012;22(3):409-17.
31. Schene A, Hees H, Koeter M, et al. *Work, mental health and depression*: Wiley-Blackwell, 2013.
32. Dewa CS, McDaid D, Ettner SL. An international perspective on worker mental health problems: who bears the burden and how are costs addressed? *Canadian Journal of Psychiatry - Revue Canadienne de Psychiatrie* 2007;52(6):346-56.

1  
2  
3  
4  
5  
6  
7  
8  
9  
10 **Work Outcomes of Sickness Absence Related to Mental Disorders:**  
11 **A Systematic Literature Review**  
12  
13

14  
15 Carolyn S. Dewa <sup>1,3§</sup>, Desmond Loong <sup>1</sup>, Sarah Bonato <sup>2</sup>  
16  
17

18  
19  
20  
21  
22 <sup>1</sup>Centre for Research on Employment and Workplace Health, Centre for Addiction and Mental  
23 Health, 33 Russell Street, Toronto, M5S 2S1, Canada  
24

25 <sup>2</sup>Library Services, Centre for Addiction and Mental Health, 33 Russell Street, Toronto, M5S 2S1,  
26 Canada  
27

28 <sup>3</sup>Department of Psychiatry, University of Toronto, 250 College Street, Toronto, M5T 1R8,  
29 Canada  
30

31  
32 Corresponding author:

33 Carolyn S. Dewa, MPH, PhD  
34 Head, Centre for Research on Employment and Workplace Health  
35 Centre for Addiction and Mental Health  
36 33 Russell St., Room 1000  
37 Toronto, Ontario M5S 2S1 Canada  
38 (416) 535-8501 x37033  
39 e-mail: carolyn.dewa@camh.ca  
40  
41

42 Keywords: mental disorders, work disability, return to work, sickness absence  
43  
44

45 | Word count: ~~39764~~774

46 | Number of figures: 1

47 | Number of tables: 3

48 | Number of references: ~~26~~32

49 | Number of supplementary files: ~~3~~2  
50  
51  
52  
53  
54  
55  
56  
57  
58  
59  
60



1  
2  
3  
4  
5  
6  
7  
8  
9 **Work Outcomes of Sickness Absence Related to Mental Disorders:**  
10 **A Systematic Literature Review**  
11

12 **Abstract**  
13

14  
15 **Objectives** The purpose of this systematic literature review is to examine the current state of  
16 knowledge regarding the return-to-work outcomes of sickness absences related to mental  
17 disorders that increase costs borne by employers. We address two questions: (1) Based on the  
18 existing literature, from the employer's perspective, what are the relevant economic return-to-  
19 work outcomes for sickness absences related to mental disorders? and (2) From the employer's  
20 economic perspective, are there gaps in knowledge about the relevant return-to-work outcomes  
21 for sickness absences related to mental disorders?  
22

23 **Setting** The included studies used administrative data from either an employer, insurer or  
24 occupational healthcare provider.  
25

26 **Participants** Studies included working adults between 18-65 years old who had a sickness  
27 absence related to a mental disorder.  
28

29 **Primary and secondary outcome measures** The studies considered two general return-to-work  
30 outcome categories: (1) outcomes focusing on return-to-work and (2) outcomes focusing on  
31 sickness absence recurrence.  
32

33 **Results** A total of 3,820 unique citations were identified. Of these, 10 studies were identified  
34 whose quality ranged from good to excellent. Half of the identified studies came from one  
35 country. The studies considered two characteristics of sickness absence: (1) whether and how  
36 long it took for a worker to return-to-work and (2) sickness absence recurrence. None of the  
37 studies examined return-to-work outcomes related to work reintegration.  
38

39 **Conclusions** The existing literature suggests that along with the incidence of sickness absence  
40 related to mental disorders, the length of sickness absence episodes and sickness absence  
41 recurrence (i.e., number and time between) should be areas of concern. However, there also  
42 seems to be gaps in the literature regarding the work reintegration process and its associated  
43 costs.  
44

45 **Background.** Sickness absence is one of the most identifiable and costly types of losses related  
46 to mental disorders. Few cost of illness estimates specifically have taken sickness absences into  
47 account. To build the case for employers to invest in interventions that target sickness absences,  
48 it is important to identify the costs associated with them. The purpose of systematic literature  
49 review is to examine the current state of knowledge regarding the characteristics of sickness  
50 absences related to mental disorders that increase workplace burdens from the perspective of the  
51 employer.  
52

1  
2  
3  
4  
5  
6  
7  
8  
9  
10  
11  
12  
13  
14  
15  
16  
17  
18  
19  
20  
21  
22  
23  
24  
25  
26  
27  
28  
29  
30  
31  
32  
33  
34  
35  
36  
37  
38  
39  
40  
41  
42  
43  
44  
45  
46  
47  
48  
49  
50  
51  
52  
53  
54  
55  
56  
57  
58  
59  
60

**Methods.** A systematic literature search was performed using: *Medline Current, Medline In-process, PsycINFO, Econlit* and *Web of Science*. The search period covered 2002-2013. The systematic literature search focused on the sickness absence outcomes of workers with medically certified sickness absences related to mental disorders.

**Results.** A total of 3,820 unique citations were identified. Of these, 10 studies were identified whose quality ranged from good to excellent. The studies considered two characteristics of sickness absence: (1) whether and how long it took for a worker to return to work and (2) sickness absence recurrence. These studies suggest that these are two areas of workplace burden to employers.

**Conclusions.** The existing literature suggests that along with the incidence of sickness absence related to mental disorders, the length and recurrence (i.e., number and time between) of these sickness absences should be areas of concern. Thus, it may be important to evaluate interventions with respect to these two aspects of sickness absences.

## ARTICLE SUMMARY

## STRENGTHS AND LIMITATIONS OF THIS STUDY:

- Few studies have examined the current state of knowledge about sickness absence outcomes from the employer perspective; this paper examines the current state of knowledge regarding the characteristics-return-to-work outcomes of sickness absences related to mental disorders that increase workplace burdens from the perspective of the employer.
- This systematic literature review employed a broad search of five electronic databases: (1) *Medline Current*, (2) *Medline In-process*, (3) *PsycINFO*, (4) *Econlit* and (5) *Web of Science*. A hand search was also conducted. In total, 3,820 unique citations were identified and reviewed by two reviewers.
- All included studies were based on data from complete populations of people who had a sickness absence; this minimizes the potential for selection bias within populations.
- The results of this review suggest that along with the incidence of sickness absence related to mental disorders, the length and sickness absence recurrence (i.e., frequency of sickness absence recurrence and time between sickness absence recurrence episodes) of these sickness absences should be areas of concern and future research. This highlights the importance of evaluating interventions with respect to these two aspects of sickness absences rather than focusing solely on whether a worker returns to work.
- The results of the search identified 10 papers that met inclusion criteria; this suggests that we are in the early stages of understanding the aspects of sickness absences that contribute to their burden and the areas to target to effectively decrease their costs.

1  
2  
3  
4  
5  
6  
7  
8  
9  
10  
11  
12  
13  
14  
15  
16  
17  
18  
19  
20  
21  
22  
23  
24  
25  
26  
27  
28  
29  
30  
31  
32  
33  
34  
35  
36  
37  
38  
39  
40  
41  
42  
43  
44  
45  
46  
47  
48  
49  
50  
51  
52  
53  
54  
55  
56  
57  
58  
59  
60

Around the world, there is ~~anxiety- increasing awareness~~ about the economic costs of mental disorders. Estimates suggest that a large share of the burden of mental disorders can be attributed to ~~losses in~~ work productivity ~~losses~~. Between 30% and 60% of depression's cost is related to losses associated with decreased work productivity<sup>1 2</sup>. Decreased work productivity has been measured as work absences or an unproductive work day.

Because they take a societal perspective, most of the economic burden estimates for mental disorders rely on survey data (e.g.,<sup>1 3 4</sup>). One of the most identifiable types of work absence is related to sickness absences. ~~Yet, F~~few estimates specifically have taken sickness absences into account. Sickness absences are defined as work absences that require a medical certification and have an associated income replacement benefit. ~~The costs of Yet,~~ these specific types of absences are not only borne by society but employers in particular. Furthermore, because they involve the workplace, employers often assume the costs and responsibilities for the interventions to address sickness absences. Thus, to ~~effectively~~ build the ~~business~~ case for employers to invest in interventions that target sickness absences ~~related to mental disorders~~, it is important to identify the costs ~~that employers recognize and directly bear~~. ~~By using a comprehensive estimate of the types of costs in economic evaluations and economic models we could more accurately estimate the types of cost-saving that employers can expect with an intervention. associated with sickness absences and where there can be cost savings that interventions offer.~~

The concern among employers regarding mental disorders has been fueled by the recognition that sickness absence episodes related to a mental disorder are costly and their incidence is steadily rising<sup>5</sup>. Estimates suggest that an episode related to a mental disorder can be double the cost of one related to a physical disorder<sup>6</sup>. The ~~calculation of the total~~ cost of

1  
2  
3  
4  
5  
6  
7  
8  
9 sickness absences related to mental disorders is comprised of ~~influenced by~~ two types of factors:  
10 (1) the number of days absent and (2) the total number of sickness absences. It can be expected  
11 that the ~~The~~ more sickness absence days, the greater the total cost of the sickness absence. In  
12 addition, high costs could be incurred with short sickness episodes if there are many repeat  
13 sickness episodes.  
14  
15  
16  
17

18 One approach to addressing the costs of sickness absence related to mental disorders  
19 could be to decrease the impact of both the number of episodes and their lengths ~~these factors~~.  
20 This suggests that interest should extend beyond merely whether a worker returns-to-work  
21 (RTW). Rather, it is also important to understand the length and the frequency of sickness  
22 absence related to mental disorders. Few studies have examined the current state of knowledge  
23 about sickness absence outcomes from the employer perspective. To fill this gap, we conducted  
24 a systematic literature review to examine the sickness absence outcomes reported in the  
25 literature. These outcomes could help to identify the aspects of sickness absences that contribute  
26 to workplace burdens.  
27  
28  
29  
30  
31  
32  
33  
34

### Purpose

35  
36  
37 The purpose of this paper is to examine the current state of knowledge regarding the  
38 return-to-work (RTW) outcomes of sickness absences related to mental disorders that increase  
39 workplace burdens from the perspective of the employer. The question that we addressed in this  
40 systematic review was, “Based on the existing literature, from the employer’s perspective, what  
41 are the relevant economic return-to-work outcomes for sickness absences related to mental  
42 disorders?” Answers to this question can highlight the aspects of sickness absences related to  
43 mental disorders that could escalate the costs that employers face. Results of this review can  
44 point to areas that sickness absence interventions could target. They can also suggest dimensions  
45  
46  
47  
48  
49  
50  
51  
52  
53  
54  
55  
56  
57  
58  
59  
60

Formatted: Underline

Formatted: Indent: First line: 0"

1  
2  
3  
4  
5  
6  
7  
8  
9  
10  
11  
12  
13  
14  
15  
16  
17  
18  
19  
20  
21  
22  
23  
24  
25  
26  
27  
28  
29  
30  
31  
32  
33  
34  
35  
36  
37  
38  
39  
40  
41  
42  
43  
44  
45  
46  
47  
48  
49  
50  
51  
52  
53  
54  
55  
56  
57  
58  
59  
60

along which future intervention effectiveness could be evaluated.

A secondary question we asked was, “From the employer’s economic perspective, are there gaps in knowledge about the relevant return-to-work outcomes for sickness absences related to mental disorders?” In answering this question, this review takes a first step in understanding where the knowledge in this area is and is not being produced. It also suggests areas where additional study is needed to more accurately estimate the costs of sickness absences borne by employers. Thus, for this review, outcomes were used to describe the characteristics of sickness absences related to mental disorders that add to workplace burdens. The purpose of this paper is to examine the current state of knowledge regarding the characteristics of sickness absences related to mental disorders that increase workplace burdens from the perspective of the employer. As such, this review is only a first step in understanding the aspects of sickness absences related to mental disorders that could escalate the costs that employers face. Results of this review can point to areas that sickness absence interventions could target. They can also suggest dimensions along which future intervention effectiveness could be evaluated as well as identify gaps in the literature.

## **METHODS**

This systematic literature review used publically available peer-reviewed studies. It did not collect or use primary data. As such, it was not subject to research ethics board review.

Five electronic databases were searched for this systematic literature review: (1) *Medline Current* (an index of biomedical research and clinical sciences journal articles), (2) *Medline In-process* (an index of biomedical research and clinical sciences journal articles awaiting indexing into *Medline Current*), (3) *PsycINFO* (an index of journal articles, books, chapters, and dissertations in psychology, social sciences, behavioral sciences, and health sciences), (4) *Econlit* (an index of journal articles, books, working papers and dissertations in Economics) and (5) *Web*

1  
2  
3  
4  
5  
6  
7  
8  
9 of Science (an index of journal articles, editorially selected books and conference proceedings  
10 in life sciences and biomedical research). A search strategy was developed and executed for  
11 each database with a professional health science librarian (SB) (Supplementary File 1 - Search  
12 Strategy). *Medline Current*, *Medline In-process* and *PsychINFO* were searched using the *OVID*  
13 platform. *Econlit* and *Web of Science* were searched using the *ProQuest* and *Thomson Reuters*  
14 search interface, respectively. The search was completed between February 2013 and March  
15 2013 and was limited to English language journals published between 2002 and 2013.  
16  
17  
18  
19  
20  
21

### 22 Eligibility Criteria

23  
24 The systematic literature search focused on the characteristics of sickness absences of  
25 workers with medically certified sickness absences related to mental disorders. Sickness absence  
26 encompassed sick leave, short-term disability leave and long-term disability leave. These  
27 sickness absence benefits could be either publicly or privately sponsored. Their receipt was  
28 conditional on employment and the absence benefit was claimed with the intention of continued  
29 employment. We included studies that looked at “no cause” sickness absences such that it was  
30 not compulsory that the absence was work-related. The search focused on identifying articles  
31 about working adults between 18-65 years old who had a sickness absence related to a mental  
32 disorder. Sickness absence outcome terms (i.e., length of sickness absence, return to work, etc.)  
33 were not included in the search strategy. This was done to ensure all reported sickness absence  
34 outcomes in the literature would be captured. The reference lists of relevant studies were hand  
35 searched. Intervention studies, review articles and commentaries were excluded.  
36  
37  
38  
39  
40  
41  
42  
43  
44  
45

46 A multi-phase screening process was employed. The first phase involved screening titles.  
47 Citations that passed the first phase were evaluated for relevance based on their abstracts.  
48  
49 Finally, those that passed the abstract screen were evaluated for content based on the full-text.  
50  
51  
52  
53  
54  
55  
56  
57  
58  
59  
60

1  
2  
3  
4  
5  
6  
7  
8  
9 The multi-phase screening process was completed independently by two reviewers, CSD and  
10 DL. The chance agreement corrected inter-rater reliability was 0.92. Articles for which there  
11 were rater disagreements were discussed until consensus was reached.  
12

13  
14 The following eligibility criteria were used in each phase:

- 15  
16 1. The study reported on medically certified sickness absences due to mental  
17 disorders.
- 18  
19 2. The study sample is not from a select (i.e., clinical trial) population.
- 20  
21 3. The study analyzed data that were collected in the year 2000 or later.
- 22  
23 4. The study reported on sickness absence outcomes directly related to a  
24 specific absence.

25  
26 Sickness absence outcomes considered for this review included length of sickness  
27 absence, not returning to work (i.e., quitting, retiring), transitioning to long term disability,  
28 returning to work, and sickness absence recurrence.  
29

30  
31 Because the 1990s was a period of global change in disability policies and accounting for  
32 publication lag, the year 2002 was used as an inclusion starting point<sup>7</sup>. We focused on the last  
33 decade because there were relatively fewer policy changes related to workers during this time.  
34  
35 Studies using pre-2000 data were excluded because pre-2000 data were collected within systems  
36 that existed before many of the 1990s policy changes.  
37  
38

### 39 40 **Quality Assessment**

41  
42 Articles that passed the three-stage screening process were then assessed for quality using  
43 the following criteria:  
44

- 45  
46 1. The study population is well described.
- 47  
48 2. The data source is well described.
- 49  
50 3. The study sample is representative of all workers in the context.
- 51  
52 4. Mental disorders are included and reported.
- 53  
54 5. The system of diagnosis/classification is described.



6. The sickness absence criteria are reported (i.e., pre-sickness absence days to qualify for sickness absence).
7. Sickness absence outcome measures are defined.
8. Analytical methods are described.
9. Uncertainty of estimates are reported.
10. The stated research objective is met.

One point was awarded for each criterion that was met; the maximum score was 10.

Total scores between 1 and 4 points were categorized as *fair/weak* quality, those between 5 and 8 points were *good* and those between 9 and 10 points were *excellent* quality.

## RESULTS

### Description of Inclusion and Exclusion

The electronic literature search resulted in the identification of 3,820 unique citations (Figure 1). From these, 24 entries that were commentaries were excluded. Based on the title review, 3,577 citations were excluded. Based on abstract review, another 151 citations were excluded; this left 64 articles for full-text review. After the full-text review, 10 articles remained and their reference lists were hand searched for relevant studies. Four articles were identified in the hand search process but all were excluded during full-text review. Reasons for article exclusions were because they: (1) used pre-2000 data (n = 11), (2) did not report sickness absence outcomes directly related to a specific absence (n = 3), (3) were based on select populations (n = 44).

-----  
Insert Figure 1  
-----

### Quality Assessment

Upon quality assessment, 5 of the 10 studies were rated as *excellent* and the remaining 5 as *good* (Supplementary File 2 - Quality Assessment). The identified limitations of these studies

1  
2  
3  
4  
5  
6  
7  
8  
9  
10  
11  
12  
13  
14  
15  
16  
17  
18  
19  
20  
21  
22  
23  
24  
25  
26  
27  
28  
29  
30  
31  
32  
33  
34  
35  
36  
37  
38  
39  
40  
41  
42  
43  
44  
45  
46  
47  
48  
49  
50  
51  
52  
53  
54  
55  
56  
57  
58  
59  
60

included: non-representativeness of the working population (n = 10), outcome measure not defined (n = 4), and uncertainty of the estimate not reported (n = 3).

### Overview of the Studies

Table 1 contains the descriptions of the included studies. All of the included studies used administrative data from either an employer, insurer or occupational healthcare provider. As a result, none of the studies relied on self-report. They were based on objective data to identify populations of people with a sickness absence.

Of the 10 included studies, five were from the Netherlands. Two were from Brazil, two were from Canada and another from the UK. Seven of the studies used data from single employers. The employers in the studies represented a variety of sectors in several countries including a Dutch national postal service and a telecommunication company<sup>8-10</sup>, a Brazilian hospital<sup>11</sup>, a Canadian resource sector organization<sup>6 12</sup> and a British police force<sup>13</sup>. The four exceptions were Barbosa-Branco et al.<sup>14</sup> whose study included all Brazilian workers in registered private sector companies. In addition, Koopman et al.<sup>15</sup> and Roelen et al.<sup>16</sup> based their studies on data from an occupational health provider representing a broad spectrum of firms across the Netherlands.

All of the studies except one indicated that they used the International Classification of Diseases (ICD) to identify type of disorder. Of those that used the ICD, eight of the studies used the 10<sup>th</sup> edition; one used the 8<sup>th</sup> edition. One study<sup>15</sup> did not describe the disorder classification system that was used. However, because it used ArboNed data that were also used by Roelen et al.<sup>16</sup>, it might be assumed that ICD codes were also used in this study.

Among the studies, there was variability in the scope of the primary diagnoses associated with the sickness absences that were included. However, there were similarities with respect to

the inclusion of depressive and anxiety disorders and stress-related disorders. Thus, there appeared to be consistency among the studies with regard to a core set of mental disorders.

There was variation with regard to the number of absence days needed to qualify for sickness absence benefits. The number of days ranged from one to three weeks.

**Table 1. Overview of Studies**

| Author(s)                    | Country | Study Population                                                                                                                                               | Data Source(s)                                                                                                                 | Years of Data | Diagnostic Classification System Used                                       | Sickness Absence Benefit Definition                                                                            | Outcomes                                                                  |
|------------------------------|---------|----------------------------------------------------------------------------------------------------------------------------------------------------------------|--------------------------------------------------------------------------------------------------------------------------------|---------------|-----------------------------------------------------------------------------|----------------------------------------------------------------------------------------------------------------|---------------------------------------------------------------------------|
| Barbosa-Branco et al. (2012) | BR      | All employees in registered private sector jobs in 2008 who a sickness absence                                                                                 | Brazilian National Social Security Administrative Databases: National Benefits System and National Social Information Database | 2008          | International Classification of Diseases, 10 <sup>th</sup> edition (ICD-10) | Sickness absence = $\geq 15$ medically certified consecutive days absent                                       | Duration of sickness benefit claim (calendar vs work days not specified)  |
| Board & Brown (2011)         | UK      | Study sample consisted of all employees of one police force who had $\geq 1$ episode of long-term sickness absence (LTSA) between Nov 1, 2000 and Oct 31, 2002 | Employer electronic absenteeism record administrative data                                                                     | 2000-2002     | International Classification of Diseases, 8 <sup>th</sup> edition (ICD-8)   | Long-term sickness absence = medically certified sickness absence episodes $\geq 28$ consecutive calendar days | Return to work by type of sickness absence episode (sub-acute or chronic) |
| Dewa et al. (2010)           | CA      | Employees from one large resource sector company from 2003-2006 who had a sickness absence                                                                     | Employer administrative sickness absence data                                                                                  | 2003-2006     | ICD-10                                                                      | Sickness absence = medically certified sickness absence of $\geq 5$ continuous work days                       | Mean work days per sickness absence episode                               |
| Dewa et al. (2011)           | CA      | Employees from one large resource sector company from 2003-2006 who had a sickness absence                                                                     | Employer administrative sickness absence data                                                                                  | 2003-2006     | ICD-10                                                                      | Sickness absence = medically certified sickness absence of $\geq 5$ continuous work days                       | Sickness absence free days                                                |
| Koopmans et al. (2008)       | NL      | Employees of firms who were clients of one occupational health services provider from April 2002 – November 2005 who had a sickness absence.                   | Administrative sickness absence data from one occupational health service provider (ArboNed)                                   | 2002-2005     | Not described                                                               | Not described                                                                                                  | Return to work<br>Duration of absence calendar days                       |

| Author(s)              | Country | Study Population                                                                                                                                             | Data Source(s)                                                                               | Years of Data | Diagnostic Classification System Used | Sickness Absence Benefit Definition                                                                             | Outcomes                                                                                                                                                                                                                                                          |
|------------------------|---------|--------------------------------------------------------------------------------------------------------------------------------------------------------------|----------------------------------------------------------------------------------------------|---------------|---------------------------------------|-----------------------------------------------------------------------------------------------------------------|-------------------------------------------------------------------------------------------------------------------------------------------------------------------------------------------------------------------------------------------------------------------|
| Koopmans et al. (2010) | NL      | Dutch Post and Telecommunication employees from 2001-2007 who had a sickness absence due to a common mental disorder since Jan 1, 2001 or date of employment | Administrative sickness absence data from one occupational health service provider (ArboNed) | 2001-2007     | ICD-10                                | Sick leaves of > 3 weeks require a medical certificate from an occupational physician                           | Duration of sickness absence days (calendar vs work days not specified)<br>Days to sickness absence recurrence                                                                                                                                                    |
| Koopman et al. (2011)  | NL      | Dutch Post and Telecommunication employees from 2001-2007 who had a sickness absence due to a common mental disorder                                         | Administrative sickness absence data from one occupational health service provider (ArboNed) | 2001-2007     | ICD-10                                | Sick leaves of > 3 weeks require a medical certificate from an occupational physician                           | Duration of sickness episodes<br>Median duration in months until recurrence of sickness absence<br>Days to sickness absence recurrence<br>Recurrence = the start of at least one new episode of sickness absence after complete return to work for $\geq 28$ days |
| Reis et al. (2011)     | BR      | Workers who worked $\geq 20$ hours/week from one university hospital who were employed from 2000-2007 who had at least 1 sickness absence                    | Administrative data from employer human resources department                                 | 2000-2007     | ICD-10                                | Not described                                                                                                   | Median calendar days per sickness absence<br>Recurrence density of sickness absence episodes/100 worker-months                                                                                                                                                    |
| Roelen et al. (2009)   | NL      | Employees of firms who were clients of an occupational health services provider from 2001-2007 who had a sickness absence                                    | Administrative sickness absence data from one occupational health service provider (ArboNed) | 2001-2007     | ICD-10                                | Sickness absence: absence of $\geq 28$ sick days requiring a medical certificate from an occupational physician | Median number of calendar days of sickness absence episodes/100 employees                                                                                                                                                                                         |

| Author(s)            | Country | Study Population                                                                     | Data Source(s)                                                                               | Years of Data | Diagnostic Classification System Used | Sickness Absence Benefit Definition                                                    | Outcomes                                                                                                                                                   |
|----------------------|---------|--------------------------------------------------------------------------------------|----------------------------------------------------------------------------------------------|---------------|---------------------------------------|----------------------------------------------------------------------------------------|------------------------------------------------------------------------------------------------------------------------------------------------------------|
| Roelen et al. (2010) | NL      | Dutch Post and Telecommunication employees from 2001-2007 who had a sickness absence | Administrative sickness absence data from one occupational health service provider (ArboNed) | 2001-2007     | ICD-10                                | Sick leaves of > 3 weeks require a medical certificate from an occupational physician. | Median duration of sickness absence in days (type of day not specified)<br>Recurrence density of sickness absence/1,000 worker-years<br>Days to recurrence |

### Sickness Absence Outcomes

The outcomes reported by the studies could be grouped into two general categories. The first outcome category includes studies that examined whether and when a worker returned to work. They included RTW indicators and sickness absence duration. The second category of outcomes focused on sickness absence recurrence. These recurrence outcomes reflected the rates of recurrence as well as the time between sickness absence episodes.

Outcomes focusing on Return-to-Work. Three studies reported the rates of RTW (Table 2). Koopmans et al.<sup>15</sup> observed that of workers who had sickness absences due to depression, 66% returned to work within a year. Board and Brown<sup>13</sup> found that among their police force, 85% of police officers who had a sickness absence returned to work.

*Duration of sickness absence.* Duration of sickness absence was measured using three types of days – calendar days, work days and unspecified types of days. Sickness absence days were reported using two statistics – the mean days and the median days. The values of the mean and the median become equivalent when a distribution is symmetric (e.g., the normal distribution). From the Netherland studies, the median days of absence duration were between 79 and 119 days<sup>8-10 15 16</sup>. In addition, there were changes in the median number of days over time

such that they seemed to decrease between 2001 and 2007<sup>16</sup>. From Brazil, Reis et al.<sup>11</sup> reported a duration of 5-7 calendar days. Using Canadian data, Dewa et al.<sup>6</sup> reported a mean absence episode of 65 work days. From the UK, Board and Brown<sup>13</sup> found that 43-60% of the workers they observed had a sickness absence episode that was between 28-90 days; about 41-57% had sickness absence episodes that lasted more than 90 days.

**Table 2. Return-to-Work Sickness Absence Outcomes**

| Author(s)                    | Country      | Mental Disorders                                                                                                                                                                                                                                                                                | Outcome Measure                                                                                                                                    | Number of episodes or employees                                                                                  | Reported Outcomes of Sickness Absences                                                                                                                                                                                                                                            |
|------------------------------|--------------|-------------------------------------------------------------------------------------------------------------------------------------------------------------------------------------------------------------------------------------------------------------------------------------------------|----------------------------------------------------------------------------------------------------------------------------------------------------|------------------------------------------------------------------------------------------------------------------|-----------------------------------------------------------------------------------------------------------------------------------------------------------------------------------------------------------------------------------------------------------------------------------|
| Barbosa-Branco et al. (2012) | BR           | Mental and behavioural disorders: Organic disorders (ICD-10 F00-F09); psychoaffective substance use disorders (ICD-10 F10-F19); schizophrenia, schizotypal and delusional disorders (ICD-10 F20-F29); mood disorders (ICD-10 F30-F39); stress-related and somatoform disorders (ICD-10 F40-F48) | Duration of sickness benefit claim = measure not described                                                                                         | Number of claims due to mental and behavioural disorders:<br>All = 147,105<br>Males = 71,195<br>Females = 75,910 | Median duration of disability episodes (in days) (1 <sup>st</sup> and 3 <sup>rd</sup> quartiles):<br>Males:<br>Mental and behavioural disorders = 76 (47, 113)<br>Females:<br>Mental and behavioural disorders = 65 (43, 97)                                                      |
| Board and Brown (2011)       | UK           | ICD categories used not described                                                                                                                                                                                                                                                               | Absence phase:<br>Sub-acute = 28-90 days<br>Chronic phase = > 90 days<br>Return-to-Work = episode has start and finish dates before study end date | Number of sickness absences:<br>Police officers = 4,485<br>Civilian staff = 1,761                                | Among those with mental ill health:<br>Police officers:<br>With sub-acute episode = 43.2%<br>With chronic episode = 56.8%<br>Who return to work = 85.2%<br>Civilian staff:<br>With sub-acute episode = 59.5%<br>With chronic episode = 40.5%<br>Who return to work = Not reported |
| Dewa et al. (2010)           | CA (Ontario) | Mental and behavioural disorders (ICD-10 F00-F99, Z502, Z503, Z561-Z566, Z630-Z639, Z729, Z733, Z738, Z864, Z915); schizophrenia, mood disorders, stress-related disorders and mental and behavioral disorders due to psychoactive substance use                                                | Duration of episode = number of work days absent                                                                                                   | Number of sickness absences:<br>Due to any disorder = 4,791<br>Due to mental and behavioural disorders = 698     | Mean days per episode (in days) (95% Confidence Interval):<br>Due to any disorder = 33.0 (31.3, 34.7)<br>Due to mental and behavioural disorders:<br>All = 64.9 (58.2, 71.6)<br>Males = 62.1 (54.1, 70.1)<br>Females = 70.0 (57.8, 82.1)                                          |

| Author(s)              | Country | Mental Disorders                                                                                                                                                                                                                                                          | Outcome Measure                                                                                                                                  | Number of episodes or employees                                                                                                                      | Reported Outcomes of Sickness Absences                                                                                                                                                                                                                                                                                                                                                                                                                                                                                                                                                                   |
|------------------------|---------|---------------------------------------------------------------------------------------------------------------------------------------------------------------------------------------------------------------------------------------------------------------------------|--------------------------------------------------------------------------------------------------------------------------------------------------|------------------------------------------------------------------------------------------------------------------------------------------------------|----------------------------------------------------------------------------------------------------------------------------------------------------------------------------------------------------------------------------------------------------------------------------------------------------------------------------------------------------------------------------------------------------------------------------------------------------------------------------------------------------------------------------------------------------------------------------------------------------------|
| Koopmans et al. (2008) | NL      | Depression (Diagnostic classification system not described in paper)                                                                                                                                                                                                      | Duration of episode = number of calendar days between first day of sick leave and date of return to work or disability pension received          | Number of new episodes due to depression = 9,910                                                                                                     | <p>Return to work within a year:<br/>Men = 67.7%<br/>Women = 64.8%<br/>Total = 66.2%</p> <p>One year of work incapacity:<br/>Men = 15.2%<br/>Women = 17.4%<br/>Total = 16.4%</p> <p>Mean duration of episode (in days) (95% CI):<br/>Men = 200 (196, 204)<br/>Women = 213 (210, 217)</p> <p>Median duration of episode (in days) (95% CI):<br/>Men = 179 (172, 186)<br/>Women = 201 (193, 209)</p>                                                                                                                                                                                                       |
| Koopmans et al. (2010) | NL      | Common mental disorders (CMD) from medical certification: stress-related (distress and adjustment disorders) (ICD-10 R45, F43) and psychiatric (mild to moderate depressive and anxiety disorders) (ICD-10 F32.0, F32.1, F40.0, F40.1, F40.2, F41.0, F41.1, F41.2, F41.3) | Duration of sickness absence = number of calendar days between first day of sick leave and date of return to work or disability pension received | <p>Number of employees with <math>\geq 1</math> sickness absence due to CMD = 8,951</p> <p>Total number of sickness absence due to CMD = 10,921</p>  | <p>From 2001-2007, median duration of index sickness absence episode (in days) (95% CI):</p> <p>Men:<br/>Stress = 49 (47, 51)<br/>Psychiatric = 168 (150, 186)<br/>Total CMD = 57 (54, 60)</p> <p>Women:<br/>Stress = 56 (53, 59)<br/>Psychiatric = 168 (151, 185)<br/>Total CMD = 67 (63, 71)</p> <p>From 2001-2007, median duration of recurrent CMD sickness absence episodes (in days) (95% CI):</p> <p>Men:<br/>Stress = 46 (41, 51)<br/>Psychiatric = 68 (39, 97)<br/>Total CMD = 48 (43, 53)</p> <p>Women:<br/>Stress = 60 (51, 69)<br/>Psychiatric = 73 (53, 93)<br/>Total CMD = 62 (55, 69)</p> |
| Koopmans et al. (2011) | NL      | Common mental disorders (CMD) from medical certification: stress-related (distress and adjustment disorders) (ICD-10 R45, F43) and psychiatric (mild to moderate depressive and anxiety disorders) (ICD-10 F32, F40, F41)                                                 | Duration of sickness absence = number of calendar days of sickness absence adjusted for partial return to work and annual worker- years          | <p>Number of employees with <math>\geq 1</math> sickness absence due to CMD = 9,904</p> <p>Total number of sickness absences due to CMD = 12,404</p> | <p>From 2001-07, duration of sickness absence episode due to CMD (in calendar days) (95% CI):</p> <p>Total = 62 (60, 64)<br/>Men = 57 (55, 59)<br/>Women = 68 (65, 71)</p>                                                                                                                                                                                                                                                                                                                                                                                                                               |

| Author(s)            | Country | Mental Disorders                                                                                                                                                                            | Outcome Measure                                                                                                                         | Number of episodes or employees                                                                                                                                                                                                                                                                                                                                     | Reported Outcomes of Sickness Absences                                                                                                                                                                                                                                                                                                                                                                                                                               |
|----------------------|---------|---------------------------------------------------------------------------------------------------------------------------------------------------------------------------------------------|-----------------------------------------------------------------------------------------------------------------------------------------|---------------------------------------------------------------------------------------------------------------------------------------------------------------------------------------------------------------------------------------------------------------------------------------------------------------------------------------------------------------------|----------------------------------------------------------------------------------------------------------------------------------------------------------------------------------------------------------------------------------------------------------------------------------------------------------------------------------------------------------------------------------------------------------------------------------------------------------------------|
| Reis et al. (2011)   | BR      | Mental and behavioral disorders (ICD-10 F00-F99)                                                                                                                                            | Duration of episode =<br>Number of calendar days absent from work                                                                       | Number of sickness absence episodes:<br><br>Due to any disorder = 5,138<br><br>Due to mental and behavioural disorders = 324                                                                                                                                                                                                                                        | Median duration of sickness absence leave (in days):<br><br>First episode:<br>Due to any disorder = 2<br><br>Due to mental and behavioural disorders = 5<br><br>Recurrent episodes:<br>Due to any disorder = 2<br><br>Due to mental and behavioural disorders = 7                                                                                                                                                                                                    |
| Roelen et al. (2009) | NL      | Mental and behavioral disorders (ICD-10 R45, F43, F32, F40 and F41) from medical certification: emotional disturbance, depressive disorders, anxiety disorders and stress-related disorders | Duration of sickness absence = calendar days between the first and last day of sickness absence                                         | Number of sickness absence episodes:<br><br>Due to any disorder:<br>2001 = 90,095<br>2002 = 104,193<br>2003 = 118,926<br>2004 = 129,024<br>2005 = 128,044<br>2006 = 108,901<br>2007 = 96,482<br><br>Due to mental and behavioural disorders:<br>2001 = 21,140<br>2002 = 22,803<br>2003 = 24,917<br>2004 = 27,533<br>2005 = 22,682<br>2006 = 20,013<br>2007 = 18,513 | Median duration of sickness absence episodes (in days) (95% CI):<br><br>Due to any disorder:<br>2001 = 73 (72, 74)<br>2002 = 63 (62, 64)<br>2003 = 57 (56, 58)<br>2004 = 53 (53, 53)<br>2005 = 45 (45, 45)<br>2006 = 49 (48, 50)<br>2007 = 55 (54, 56)<br><br>Due to mental and behavioural disorders:<br>2001 = 119 (116, 122)<br>2002 = 98 (96, 100)<br>2003 = 87 (85, 89)<br>2004 = 80 (79, 81)<br>2005 = 79 (77, 81)<br>2006 = 83 (81, 85)<br>2007 = 87 (85, 89) |
| Roelen et al. (2010) | NL      | Mental and behavioral disorders (ICD-10 F00-F99) from medical certification                                                                                                                 | Duration of sickness absence = number of days between first day of sick leave and date of return to work or disability pension received | Number of employees with $\geq 1$ sickness absence = 36,342<br><br>Number of employees with $\geq 1$ sickness absence due to mental and behavioural disorders = 7,197<br><br>Number of employees with $> 1$ sickness absence due to mental and behavioural disorders = 1,400<br><br>Worker-years = 363,461                                                          | Median duration of sickness absence (in days) (95% CI):<br><br>Mental and behavioural disorders = 62 (55, 69)<br><br>Any disorder = 35 (34, 36)                                                                                                                                                                                                                                                                                                                      |

Four of the studies compared sickness absence episode duration for those related to



1  
2  
3  
4  
5  
6  
7  
8  
9 mental disorders versus those for other disorders. The findings among the four studies were  
10 consistent; episodes for mental disorders were longer than episodes related to other types of  
11 disorders. For instance, Roelen et al.<sup>10</sup> reported that while the median duration of a mental  
12 disorder related episode was 62 days, it was 35 days for any type of episode. In addition, this  
13 pattern appeared to be consistent from 2001 to 2007<sup>16</sup>. Among their Canadian energy sector  
14 workers, Dewa et al.<sup>6</sup> found that the mean number of work days of an episode related to a mental  
15 disorder was almost double that of an episode related to other types of disorders (65 days versus  
16 33 days). Reis et al.<sup>11</sup> reported similar patterns among their sample of Brazilian healthcare  
17 workers.

18  
19  
20  
21  
22  
23  
24  
25  
26 Outcomes Focusing on Sickness Absence Recurrence. Three of the studies reported rates  
27 of sickness absence recurrence related to a mental disorder (Table 3). Roelen et al.<sup>10</sup> reported  
28 recurrence rates of 80/1000 worker-years for mental and behavioural disorders as opposed to  
29 82/1000 worker-years for any disorder. Reis et al.<sup>11</sup> found rates of 7/100 worker-months for  
30 mental and behavioural disorders and 17/100 worker-months for any disorder. In addition,  
31 Koopmans et al.<sup>9</sup> observed mental disorder sickness absence recurrence rates of 76/1000 worker-  
32 years for men and 79/1000 worker-years for women. They also found that 18% of workers with  
33 at least one sickness absence episode had a recurrent episode<sup>9</sup>.

34  
35  
36  
37  
38  
39  
40  
41 **Table 3. Recurrence Sickness Absence Outcomes**

| Author(s)          | Country      | Mental Disorders                                                                                                                                                                                                                                 | Outcome Measure                                                                                   | Number of episodes or employees                                                                                                   | Reported Outcomes of Sickness Absences                                                                                                                       |
|--------------------|--------------|--------------------------------------------------------------------------------------------------------------------------------------------------------------------------------------------------------------------------------------------------|---------------------------------------------------------------------------------------------------|-----------------------------------------------------------------------------------------------------------------------------------|--------------------------------------------------------------------------------------------------------------------------------------------------------------|
| Dewa et al. (2011) | CA (Ontario) | Mental and behavioural disorders (ICD-10 F00-F99, Z502, Z503, Z561-Z566, Z630-Z639, Z729, Z733, Z738, Z864, Z915): schizophrenia, mood disorders, stress-related disorders and mental and behavioral disorders due to psychoactive substance use | Disability free days = number of between end of first episode and beginning of subsequent episode | Number of employees with $\geq 1$ sickness absence episode:<br>Due to mental disorders = 422<br>Due to physical disorders = 3,171 | Median disability free days (standard error):<br>Previous episode for mental disorders = 673 (79.8)<br>Previous episode for physical disorders = 1053 (48.6) |

| Author(s)              | Country | Mental Disorders                                                                                                                                                                                                                                                          | Outcome Measure                                                                                                                                                                                                                                                                                                             | Number of episodes or employees                                                                                                                      | Reported Outcomes of Sickness Absences                                                                                                                                                                                                                                                                                                                                                                                                                                                                                                                                                                                                                                                                                                                                                                                         |
|------------------------|---------|---------------------------------------------------------------------------------------------------------------------------------------------------------------------------------------------------------------------------------------------------------------------------|-----------------------------------------------------------------------------------------------------------------------------------------------------------------------------------------------------------------------------------------------------------------------------------------------------------------------------|------------------------------------------------------------------------------------------------------------------------------------------------------|--------------------------------------------------------------------------------------------------------------------------------------------------------------------------------------------------------------------------------------------------------------------------------------------------------------------------------------------------------------------------------------------------------------------------------------------------------------------------------------------------------------------------------------------------------------------------------------------------------------------------------------------------------------------------------------------------------------------------------------------------------------------------------------------------------------------------------|
| Koopmans et al. (2010) | NL      | Common mental disorders (CMD) from medical certification: stress-related (distress and adjustment disorders) (ICD-10 R45, F43) and psychiatric (mild to moderate depressive and anxiety disorders) (ICD-10 F32.0, F32.1, F40.0, F40.1, F40.2, F41.0, F41.1, F41.2, F41.3) | <p>Recurrence density = number of employees with recurrent episodes by the worker-years in the sub-population of men and women with a previous episode of sickness absence due to a CMD</p> <p>New episodes = &gt; 28 days apart</p> <p>Worker-years = years of coverage from index episode to end of employment period</p> | <p>Number of employees with <math>\geq 1</math> sickness absence due to CMD = 8,951</p> <p>Total number of sickness absence due to CMD = 10,921</p>  | <p>From 2001-2007, episodes per worker with <math>\geq 1</math> sickness absence related to CMD:</p> <p>1 episode = 82%</p> <p>2 episodes = 14%</p> <p>3 episodes = 3%</p> <p><math>\geq 4</math> episodes = 1%</p> <p>From 2001-07, CMD recurrence densities/1,000 worker-years (95% CI):</p> <p>Men:<br/>Stress = 74.4 (72.9, 76.0)<br/>Psychiatric = 83.8 (71.9, 95.7)<br/>Total CMD = 75.6 (70.7, 80.4)</p> <p>Women:<br/>Stress = 78.4 (75.9, 80.9)<br/>Psychiatric = 78.9 (64.1, 93.7)<br/>Total CMD = 78.5 (72.4, 84.6)</p> <p>From 2001-07, CMD sickness absence median time to onset recurrence (in months) (95% CI):</p> <p>Men:<br/>Stress = 11 (11, 13)<br/>Psychiatric = 12 (8, 15)<br/>Total CMD = 11 (10, 13)</p> <p>Women:<br/>Stress = 11 (9, 12)<br/>Psychiatric = 10 (8, 12)<br/>Total CMD = 10 (9, 12)</p> |
| Koopmans et al. (2011) | NL      | Common mental disorders (CMD) from medical certification: stress-related (distress and adjustment disorders) (ICD-10 R45, F43) and psychiatric (mild to moderate depressive and anxiety disorders) (ICD-10 F32, F40, F41)                                                 | <p>Recurrence density = number of employees with recurrent episodes by the worker-years in the sub-population of men and women with a previous episode of sickness absence due to a CMD</p> <p>Worker-years = years of coverage from index episode to end of employment period</p>                                          | <p>Number of employees with <math>\geq 1</math> sickness absence due to CMD = 9,904</p> <p>Total number of sickness absences due to CMD = 12,404</p> | <p>From 2001-07, CMD sickness absence median time to onset recurrence (in months) (95% CI):</p> <p>Total = 10 (10, 11)<br/>Distress symptoms = 11 (10, 12)<br/>Adjustment disorder = 11 (9, 12)<br/>Depressive symptoms = 10 (7, 12)<br/>Anxiety symptoms = 10 (7, 14)<br/>Other CMD disorders = 8 (6, 9)</p>                                                                                                                                                                                                                                                                                                                                                                                                                                                                                                                  |

| Author(s)            | Country | Mental Disorders                                                            | Outcome Measure                                                                                                                                                                                        | Number of episodes or employees                                                                                                                                                                                                                                                                | Reported Outcomes of Sickness Absences                                                                                                                                                                                                                                                                |
|----------------------|---------|-----------------------------------------------------------------------------|--------------------------------------------------------------------------------------------------------------------------------------------------------------------------------------------------------|------------------------------------------------------------------------------------------------------------------------------------------------------------------------------------------------------------------------------------------------------------------------------------------------|-------------------------------------------------------------------------------------------------------------------------------------------------------------------------------------------------------------------------------------------------------------------------------------------------------|
| Reis et al. (2011)   | BR      | Mental and behavioral disorders (ICD-10 F00-F99)                            | Duration of episode = Number of calendar days absent from work<br>Recurrence density = number of recurrent sickness absences divided by total worker-time at risk for the subsequent sickness absences | Number of sickness absence episodes:<br>Due to any disorder = 5,138<br>Due to mental and behavioural disorders = 324                                                                                                                                                                           | Recurrence density/100 worker-months:<br>Due to any disorder = 17.37<br>Due to mental and behavioural disorders = 6.72                                                                                                                                                                                |
| Roelen et al. (2010) | NL      | Mental and behavioral disorders from medical certification (ICD-10 F00-F99) | Recurrence density = number of employees with recurrent episodes by the worker-years in the sub-population of men and women with a previous episode of sickness absence                                | Number of employees with $\geq 1$ sickness absence = 36,342<br>Number of employees with $\geq 1$ sickness absence due to mental and behavioural disorders = 7,197<br>Number of employees with $> 1$ sickness absence due to mental and behavioural disorders = 1,400<br>Worker-years = 363,461 | From 2001-2007,<br>Recurrence density/1,000 worker-years (95% CI):<br>Mental and behavioural disorders = 80.4 (74.9, 86.0)<br>Any disorder = 81.6 (79.1, 84.0)<br>Median days to recurrence (in days) (95% CI):<br>Mental and behavioural disorders = 328 (284, 372)<br>Any disorder = 384 (367, 401) |

*Time between Sickness Absence Episodes.* Four studies reported the time between episodes related to mental disorders. Koopmans et al.<sup>8</sup> found that the median time was 10 months. In addition, Koopmans et al.<sup>9</sup> observed the median lengths of episode free-months were similar for men (11 months) and women (10 months).

Roelen et al.<sup>10</sup> compared lengths of episode free-days for those related to mental disorders versus those related to any disorder. They found the median length of episode free days was longer for workers who had a previous sickness absence episode for any disorder (384 days) versus those who had a previous episode related to a mental disorder (328 days). Dewa et al.<sup>12</sup> also observed a longer period of sickness absence free days for workers who had a previous sickness absence episode related to a physical disorder (1053 days) than those who had a previous sickness absence episode related to a mental disorder (673 days).

1  
2  
3  
4  
5  
6  
7  
8  
9  
10  
11  
12  
13  
14  
15  
16  
17  
18  
19  
20  
21  
22  
23  
24  
25  
26  
27  
28  
29  
30  
31  
32  
33  
34  
35  
36  
37  
38  
39  
40  
41  
42  
43  
44  
45  
46  
47  
48  
49  
50  
51  
52  
53  
54  
55  
56  
57  
58  
59  
60

## DISCUSSION

~~Based on the existing literature from the employer's perspective, what are the relevant return-to-work outcomes for sickness absence related to mental disorders? The results of the 10 studies could be grouped into two general outcome categories: (1) outcomes focusing on return-to-work and (2) outcomes focusing on sickness absence recurrence. This systematic literature review identified 10 studies that ranged from good to excellent quality. The results of the studies could be grouped into two general categories: (1) outcomes focusing on return to work and (2) outcomes focusing on sickness absence recurrence. These studies suggest that these are two areas of workplace burden to employers.~~

Two of the included studies that looked at RTW outcomes indicated that the majority of workers who have a sickness absence return to work at the end of the absence<sup>13 15</sup>. This trend is consistent with early studies that indicated a large proportion of workers return to work at the end of their absence<sup>17 18</sup>. This suggests that retention of workers may not be one of the major burdens associated with sickness absence. It also raises the question of what happens to workers who do not return to work at the end of their sickness absence. This is particularly salient for North American (i.e., United States and Canada) employers who offer long-term work disability benefits to their workforces. Although a small group, workers who receive long-term disability benefits after reaching the limits of their sickness absence benefits could represent high costs. One estimate suggested that it could cost CAN \$80,000 per long-term disability claim<sup>5</sup>.

The results of the studies suggest that sickness absence duration ranges from 5-119 days. The variation among the estimates may reflect the variation among the sickness benefit schemes of the jurisdictions in which the studies were conducted. However, there were consistencies among a number of reported patterns. For example, the numbers of sickness absence days

1  
2  
3  
4  
5  
6  
7  
8  
9 related to mental disorders were greater than those for physical disorders in the four studies that  
10 reported them<sup>6 9 14 15</sup>. In addition, compared to absences related to physical disorders, those  
11 related to mental disorders may be of greater length and in turn, burden.  
12

13  
14 With regard to sickness absence recurrence, the studies that calculated recurrence rates  
15 reported rates that ranged from 7/100 worker months to 80/1,000 worker-years. While there is  
16 variation in the magnitudes of the reported rates, two studies also indicated that the time between  
17 a sickness absence recurrence is consistently longer for workers who had a past sickness absence  
18 related to a physical disorder versus a mental disorder. However, while the pattern seemed to be  
19 consistent, the median numbers of sickness absence free days were two to three times greater in  
20 Dewa et al.'s<sup>12</sup> study than Roelen et al.'s<sup>10</sup>. Because workers within these respective studies are  
21 exposed to the same sickness benefit scheme, the differences within the studies suggest there  
22 may be other potential contributors to the differences than solely the sickness benefit scheme.  
23 There is an opportunity for future research to explore the role that individual (e.g., the chronic  
24 nature of mental disorders), occupational (e.g., job characteristics) and environmental (e.g.,  
25 workplace stigma) factors play in the differences in the recurrence of physical versus mental  
26 disorder related sickness absences.  
27  
28  
29  
30  
31  
32  
33  
34  
35  
36  
37  
38

39 These results also suggest that although most workers return to work, they also may be at  
40 higher risk of a repeat sickness absence episode. Indeed, the literature suggests that mental  
41 disorders such as depression are chronic in nature and have a high recurrence rate.<sup>19-21</sup> However,  
42 does symptom relapse automatically necessitate an accompanying sickness absence? Given that  
43 work disability is not solely a medical problem, there have been suggestions that eh prognosis  
44 need to be fatalistic; sickness absence is not always required. For example, workplace  
45 accomodations could help workers experiencing an episode of mental illness continue to work  
46  
47  
48  
49  
50  
51  
52  
53  
54  
55  
56  
57  
58  
59  
60

Formatted: Superscript

1  
2  
3  
4  
5  
6  
7  
8  
9  
10  
11  
12  
13  
14  
15  
16  
17  
18  
19  
20  
21  
22  
23  
24  
25  
26  
27  
28  
29  
30  
31  
32  
33  
34  
35  
36  
37  
38  
39  
40  
41  
42  
43  
44  
45  
46  
47  
48  
49  
50  
51  
52  
53  
54  
55  
56  
57  
58  
59  
60

during an episode.<sup>22,23</sup> In addition, there is an emerging literature looking at the effectiveness of interventions in decreasing sickness absence recurrence for mental disorders.<sup>24,25</sup> That is, although there have been arguments for treating mental disorders as chronic illnesses, there have been few intervention studies that have focused on decreasing sickness absence recurrence for mental disorders.

Formatted: Superscript

This also points to one of the gaps in the literature. While there have been few studies have estimated estimating the cost of work re-integration and accommodation for workers with mental disorders. None of the studies identified in this review examined the time it took for a worker to completely reintegrate back into work. For example, how long is the work accommodation period? Furthermore, how is productivity affected during the reintegration period? There is evidence suggesting that there may be costs to the workplace related to the process of re-integrating a worker who has been absent because of a sickness episode<sup>19-21</sup>.

Moreover, there also there is evidence to suggest that employers and workers have identified work sustainability without sickness absence recurrence as an important work outcome<sup>22</sup>. Given that work sustainability without sickness absence recurrence seems to be a preference of both workers and employees and there are potential costs related to reintegration, these findings suggest that it may be important to consider number of episodes as well as total number of absence days alone. Few burden of illness studies for mental disorders have included the costs of recurrent sickness absence in their estimate. But, recurrent sickness absences episodes seem to be a cost that warrants consideration for inclusion in cost estimates as well as for intervention outcomes. It is also an area that warrants further research to understand the costs associated with the re-integration process.

In addition, five of the 10 studies identified are from one country (the Netherlands) and

1  
2  
3  
4  
5  
6  
7  
8  
9 two population groups within that country. At the same time, the databases that were used  
10 represented between 10,000 and 100,000 claims. Thus, the findings that emerge from these  
11 databases build a compelling case that the length of sickness absence and its recurrence is a  
12 burden on employers. However, the fact that the majority of the evidence is being generated by  
13 one country raises interesting questions. Is the reason that the Netherlands and Northern Europe  
14 are the sources of most of the intervention studies for sickness absences related to mental  
15 disorders because they have compelling data to make the case about the costs to employers? Are  
16 the results from the Netherlands generalizable to other countries?

17  
18  
19  
20  
21  
22  
23  
24 In addition to Dutch studies, there were five other studies identified. However, these  
25 studies actually represented a total of four population groups. Three of the dataset each  
26 represented about 5,000 claims from single organizations (the studies from the UK, Canada and  
27 one Brazilian study). The exception was the one Brazilian study that represented 140,000 claims  
28 (all workers in registered private sector jobs). This suggests that there is an opportunity for the  
29 evidence base to group in these countries. It also begs the question, “What is known about the  
30 sickness absences burden in other countries that were not represented in this search (i.e., the US,  
31 the missing EU countries and Asia)? Does the absence of studies from other countries indicate  
32 that it is not a concern in the other countries? Or, is it an indication that awareness is yet to be  
33 raised?

34  
35  
36  
37  
38  
39  
40  
41  
42 It should be noted that the sickness absence outcomes that have been studied are related  
43 to the potential direct costs to employers. That is, because of the effect on work productivity,  
44 employers will be interested in the length of sickness absences as well as recurrence of sickness  
45 absence. However, from a societal perspective, this presents only part of picture. What happens  
46 to workers who do not return to work? This is a question governments may want answered  
47  
48  
49  
50  
51  
52

1  
2  
3  
4  
5  
6  
7  
8  
9  
10  
11  
12  
13  
14  
15  
16  
17  
18  
19  
20  
21  
22  
23  
24  
25  
26  
27  
28  
29  
30  
31  
32  
33  
34  
35  
36  
37  
38  
39  
40  
41  
42  
43  
44  
45  
46  
47  
48  
49  
50  
51  
52  
53  
54  
55  
56  
57  
58  
59  
60

~~especially if it means that those workers become enrolled in the public disability programs<sup>23</sup>.~~

~~Thus, future work should also examine this group of workers particularly if factors can be identified that retain them in the labour market.~~

### **Strengths and Limitations Related to Interpreting the Literature**

There were a number of strengths of the current body of literature reviewed. First, all of the data from the included studies used data from complete populations of people who had a sickness absence. This minimizes the potential for selection bias within populations. However, selection bias related to the population chosen is still a possibility. Indeed, there was variation in the populations covered ranging from multiple to single organizations. Consequently, it will be important for future work to examine whether the results are generalizable to different populations.

An additional strength of the included studies was that they used standardized diagnostic classification systems. All included depressive and anxiety disorders as well as stress-related disorders. However, there was variability in the other types of mental disorders considered. This could have affected some of the reported results. At the same time, it should be noted that the majority of sickness absences related to mental disorders are attributable to depression, anxiety and stress-related disorders<sup>24 25</sup>. This suggests that inclusion of these disorders would capture a large proportion of the sickness absences related to mental disorders.

A limitation of the studies was the variation in the years from which the data were taken. Although all studies used post-2000, there could have been changes within systems that could have affected incidence rates. For example, in the Netherlands, extensive legislative changes occurred between 2000 and 2013 which affected rates<sup>7 26</sup>. In fact, the changes are reflected in the results reported by Roelen et al.<sup>16</sup>. Similarly, changes could have been implemented in other



1  
2  
3  
4  
5  
6  
7  
8  
9 countries such that results may not currently be generalizable.

10 Another limitation was variability in the sickness absence benefit schemes. That is, the variation  
11 in the length of sickness absence episodes in part could be related to the length of sickness  
12 absence coverage. The longer the coverage, the longer the absence may be. The frequency of  
13 sickness absence recurrence also could be affected by the benefit scheme. If there are limits on  
14 the number of sickness absence days that a worker is allowed annually, those workers could have  
15 fewer episodes than workers for whom limits do not exist.  
16  
17  
18  
19  
20

### 21 **Strengths and Limitations of the Search Strategy**

22 Although five databases were used in the search, articles that did not appear in any of the  
23 databases could have been overlooked. This possibility was decreased due to the broad scope of  
24 each of the searched databases and the hand search. Another limitation is related to the fact that  
25 the search focused on articles published in English-language journals. However, despite the  
26 English-language constraint, the identified studies originated in European, North American and  
27 Latin American countries. This indicates that although they are not in countries where English is  
28 the first language, at least some of these researchers publish in English-language journals.  
29  
30  
31  
32  
33  
34  
35

36  
37 It should be noted that the sickness absence outcomes that have been studied are related  
38 to the potential direct costs to employers. That is, because of the effect on work productivity,  
39 employers will be interested in the length of sickness absences as well as recurrence of sickness  
40 absence. However, from a societal perspective, this presents only part of picture. What happens  
41 to workers who do not return to work? This is a question governments may want answered  
42 especially if it means that those workers become enrolled in the public disability programs<sup>23</sup>.  
43 Thus, future work should also examine this group of workers particularly if factors can be  
44 identified that retain them in the labour market.  
45  
46  
47  
48  
49  
50  
51  
52

## CONCLUSIONS

This systematic literature review identified only 10 studies published in the last decade.

The results of these existing studies suggest that along with the incidence of sickness absence related to mental disorders, the length and recurrence (e.g., frequency of recurrence and time between recurrence) of these sickness absences should be areas of concern.

This systematic review also highlights gaps in the literature. For instance, half of the existing studies are from the Netherlands. That is, most of the literature in this area is based on the Netherlands's experience. This suggests that in other parts of the world, this area of research is in its infancy. It will be important for research in other countries to look at the length and recurrence (i.e., frequency of recurrence and time between recurrences) of sickness absences.

This basic knowledge will help with understanding to what extent it should be a concern for employers in other countries. In turn, it could also help to build the business cases for increased resources toward the development of more sickness absence interventions in these other countries.

~~Five of them were from the Netherlands. This suggests that this is an emerging area of research.~~—The results of these studies also indicate suggest that we are in the early stages of understanding the aspects of sickness absences that contribute to their burden and along the same vein in the process, areas to target to effectively decrease their costs. For example, more research is needed regarding the costs of sickness absence recurrence including the cost of reintegration and time to full reintegration. This suggests that current cost estimates may underestimate the costs of sickness absences from the employer's perspective. To effectively build the business case for employers to invest in interventions that target sickness absences related to mental disorders, it will be important to develop a more comprehensive picture of the costs associated

1  
2  
3  
4  
5  
6  
7  
8  
9 with sickness absence that employers directly bear. Only in this way can economic evaluations  
10 and economic models accurately estimate the types of cost-savings that employers can expect  
11 with an intervention. At the same time, there are patterns in the results that could be useful in  
12 developing interventions. The results of these studies suggest that along with the incidence of  
13 sickness absence related to mental disorders, the length and recurrence (i.e., frequency of  
14 recurrence and time between recurrence) of these sickness absences should be areas of concern.  
15 Thus, it may be important to evaluate interventions with respect to these two aspects of sickness  
16 absences.  
17  
18  
19  
20  
21  
22  
23

#### 24 **DATA SHARING STATEMENT**

25 All the published papers used in this manuscript are publicly available. There are no data  
26 available.  
27  
28

#### 29 **FUNDING**

30 This work was funded by [one of the author's] Canadian Institutes of Health Research/Public  
31 Health Agency of Canada Applied Public Health Chair (FRN#:86895). Any views expressed or  
32 errors are the sole responsibility of the authors.  
33  
34  
35  
36

#### 37 **COMPETING INTERESTS**

38 The authors declare that they have no competing interests.  
39

#### 40 **CONTRIBUTORSHIP STATEMENT**

41 CSD led the conception, design, data acquisition, analysis and interpretation of the data; she also  
42 led the writing of the overall manuscript. DL collaborated on the design, data acquisition and  
43 analysis; he contributed to the writing of the overall manuscript and led the writing of the  
44 Methods section. SB collaborated on the design and data acquisition and contributed to the  
45 writing of the manuscript. All authors are guarantors of the final manuscript.  
46  
47  
48  
49  
50  
51  
52  
53  
54  
55  
56  
57  
58  
59  
60

1  
2  
3  
4  
5  
6  
7  
8  
9  
10  
11  
12  
13  
14  
15  
16  
17  
18  
19  
20  
21  
22  
23  
24  
25  
26  
27  
28  
29  
30  
31  
32  
33  
34  
35  
36  
37  
38  
39  
40  
41  
42  
43  
44  
45  
46  
47  
48  
49  
50  
51  
52  
53  
54  
55  
56  
57  
58  
59  
60**REFERENCES**

1. Greenberg PE, Leong SA, Birnbaum HG, Robinson RL. The economic burden of depression with painful symptoms. *J Clin Psychiatry* 2003;64 Suppl 7:17-23.
2. Stephens T, Joubert N. The economic burden of mental health problems in Canada. *Chronic Dis Can* 2001;22(1):18-23.
3. Greenberg PE, Sisitsky T, Kessler RC, Finkelstein SN, Berndt ER, Davidson JR, et al. The economic burden of anxiety disorders in the 1990s. *J Clin Psychiatry* 1999;60(7):427-35.
4. Stewart WF, Ricci JA, Chee E, Hahn SR, Morganstein D. Cost of lost productive work time among US workers with depression.[Erratum appears in JAMA. 2003 Oct 22;290(16):2218]. *JAMA* 2003;289(23):3135-44.
5. Sairanen S, Matzanke D, Smeall D. The Business Case: Collaborating to Help Employees Maintain Their Mental Well-Being. *Healthcare Papers* 2011(11):78-84.
6. Dewa CS, Chau N, Dermer S. Examining the comparative incidence and costs of physical and mental health-related disabilities in an employed population. *J Occup Environ Med* 2010;52(7):758-62.
7. Organisation for Economic Cooperation and Development. *Transforming Disability into Ability: Policies to promote work and income security for disabled people*: OECD Publishing, 2003.
8. Koopmans PC, Bultmann U, Roelen CA, Hoedeman R, van der Klink JJ, Groothoff JW. Recurrence of sickness absence due to common mental disorders. *Int Arch Occup Environ Health* 2011;84(2):193-201.
9. Koopmans PC, Roelen CA, Bultmann U, Hoedeman R, van der Klink JJ, Groothoff JW. Gender and age differences in the recurrence of sickness absence due to common mental disorders: a longitudinal study. *BMC Public Health* 2010;10:426.
10. Roelen CA, Koopmans PC, Anema JR, van der Beek AJ. Recurrence of medically certified sickness absence according to diagnosis: a sickness absence register study. *J Occup Rehabil* 2010;20(1):113-21.
11. Reis RJ, Utzet M, La Rocca PF, Nedel FB, Martin M, Navarro A. Previous sick leaves as predictor of subsequent ones. *Int Arch Occup Environ Health* 2011;84(5):491-9.
12. Dewa CS, Chen MC, Chau N, Dermer S. Examining factors associated with the length of short-term disability-free days among workers with previous short-term disability episodes. *J Occup Environ Med* 2011;53(6):669-73.
13. Board BJ, Brown J. Barriers and enablers to returning to work from long-term sickness absence: Part I-A quantitative perspective. *Am J Ind Med* 2011;54(4):307-24.

14. Barbosa-Branco A, Bultmann U, Steenstra I. Sickness benefit claims due to mental disorders in Brazil: associations in a population-based study. *Cad Saude Publica* 2012;28(10):1854-66.
15. Koopmans PC, Roelen CAM, Groothoff JW. Sickness absence due to depressive symptoms. *Int Arch Occup Environ Health* 2008;81(6):711-19.
16. Roelen CA, Koopmans PC, Hoedeman R, Bultmann U, Groothoff JW, van der Klink JJ. Trends in the incidence of sickness absence due to common mental disorders between 2001 and 2007 in the Netherlands. *Eur J Public Health* 2009;19(6):625-30.
17. Conti DJ, Burton WN. The economic impact of depression in a workplace. *J Occup Med* 1994;36(9):983-8.
18. Dewa CS, Goering P, Lin E, Paterson M. Depression-related short-term disability in an employed population. *J Occup Environ Med* 2002;44(7):628-33.
19. Gates LB. Workplace Accommodation as a Social Process. *J Occup Rehabil* 2000;10(1):85-98.
20. Freeman D, Cromwell C, Aarenau D, Hazelton M, Lapointe M. Factors Leading to Successful Workplace Integration of Employees Who Have Experienced Mental Illness. *Employee Assistance Quarterly* 2004;19(4):51-58.
21. Tse S. What do employers think about employing people with experience of mental illness in New Zealand workplaces? *Work* 2004;23(3):267-74.
22. Hees HL, Nieuwenhuijsen K, Koeter MWJ, Bultmann U, Schene AH. Towards a New Definition of Return-to-Work Outcomes in Common Mental Disorders from a Multi-Stakeholder Perspective. *PLoS ONE* 2012;7(6).
23. Dewa CS, McDaid D, Ettner SL. An international perspective on worker mental health problems: who bears the burden and how are costs addressed? *Canadian Journal of Psychiatry - Revue Canadienne de Psychiatrie* 2007;52(6):346-56.
24. Henderson M, Glozier N, Holland Elliott K. Long term sickness absence. *Br Med J* 2005;330(7495):802-3.
25. Roelen CA, Norder G, Koopmans PC, van Rhenen W, van der Klink JJ, Bultmann U. Employees sick-listed with mental disorders: who returns to work and when? *J Occup Rehabil* 2012;22(3):409-17.
26. Schene A, Hees H, Koeter M, de Vries G. *Work, mental health and depression*: Wiley-Blackwell, 2013.

## Search Strategy

Database: Medline Current

Search Terms: [exp Mental Disorders/ OR exp Mentally Ill Persons/ OR (mental adj3 disorder\$).mp. OR (mental\$ adj3 ill\$).mp. OR (psychiatric\$ adj3 disorder\$).mp. OR (psychiatric\$ adj3 ill\$).mp. OR exp Substance-Related Disorders/ OR exp "Diagnosis, Dual (Psychiatry)"/ OR (concurrent\$ adj3 disorder\$).mp. OR (dual\$ adj3 diag\$).mp. OR (alcohol\$ adj3 abus\$).mp. OR (alcohol\$ adj3 depend\$).mp. OR (substance\$ adj3 abus\$).mp. OR (substance\$ adj3 depend\$).mp. OR (drug\$ adj3 abus\$).mp. OR (drug\$ adj3 depend\$).mp. OR addiction\$.mp.] **AND** [exp Absenteeism/ OR exp Sick Leave/ OR exp Return to Work/ OR exp Personnel Turnover/ OR Social Welfare/ OR Public Assistance/ OR exp Insurance Disability/ OR exp Insurance Benefits/ OR exp Salaries/ OR exp Fringe Benefits/ OR exp Social Security/ OR exp Retirement/ OR (sick\$ adj3 day\$).mp. OR (illness\$ adj3 leave\$).mp. OR (disabilit\$ adj3 leave\$).mp. OR (short term disabilit\$).mp. OR (long term disabilit\$).mp. OR (work\$ adj3 absence\$).mp. OR (return\$ to work\$).mp. OR (work\$ adj3 turnover\$).mp. OR (employ\$ adj3 turnover\$).mp. OR (disabilit\$ benefit\$).mp. OR (employ\$ benefit\$).mp. OR (work\$ benefit\$).mp. OR (sick\$ benefit\$).mp. OR (incapacit\$ benefit\$).mp. OR (social\$ welfar\$).mp. OR (public\$ assistanc\$).mp. OR (insurance\$ disabilit\$).mp. OR (insurance\$ benefit\$).mp. OR (old\$ age\$ assistanc\$).mp. OR (social\$ securit\$).mp. OR retire\$.mp.] **AND** [sn.fs. OR ep.fs. OR preval\$.mp. OR incid\$.mp. OR statistic\$.mp. OR exp Epidemiologic Methods/]

1  
2  
3 Database: Medline In-process

4 Search Terms: [exp Mental Disorders/ OR exp Mentally Ill Persons/ OR (mental adj3  
5 disorder\$).mp. OR (mental\$ adj3 ill\$).mp. OR (psychiatric\$ adj3 disorder\$).mp. OR  
6 (psychiatric\$ adj3 ill\$).mp. OR exp Substance-Related Disorders/ OR exp "Diagnosis,  
7 Dual (Psychiatry)"/ OR (concurrent\$ adj3 disorder\$).mp. OR (dual\$ adj3 diag\$).mp. OR  
8 (alcohol\$ adj3 abus\$).mp. OR (alcohol\$ adj3 depend\$).mp. OR (substance\$ adj3  
9 abus\$).mp. OR (substance\$ adj3 depend\$).mp. OR (drug\$ adj3 abus\$).mp. OR (drug\$  
10 adj3 depend\$).mp. OR addiction\$.mp.] **AND** [exp Absenteeism/ OR exp Sick Leave/  
11 OR exp Return to Work/ OR exp Personnel Turnover/ OR Social Welfare/ OR Public  
12 Assistance/ OR exp Insurance Disability/ OR exp Insurance Benefits/ OR exp Salaries/  
13 OR exp Fringe Benefits/ OR exp Social Security/ OR exp Retirement/ OR (sick\$ adj3  
14 day\$).mp. OR (illness\$ adj3 leave\$).mp. OR (disabilit\$ adj3 leave\$).mp. OR (short term  
15 disabilit\$).mp. OR (long term disabilit\$).mp. OR (work\$ adj3 absence\$).mp. OR (return\$  
16 to work\$).mp. OR (work\$ adj3 turnover\$).mp. OR (employ\$ adj3 turnover\$).mp. OR  
17 (disabilit\$ benefit\$).mp. OR (employ\$ benefit\$).mp. OR (work\$ benefit\$).mp. OR (sick\$  
18 benefit\$).mp. OR (incapacit\$ benefit\$).mp. OR (social\$ welfar\$).mp. OR (public\$  
19 assistanc\$).mp. OR (insurance\$ disabilit\$).mp. OR (insurance\$ benefit\$).mp. OR (old\$  
20 age\$ assistanc\$).mp. OR (social\$ securit\$).mp. OR retire\$.mp.] **AND** [sn.fs. OR ep.fs.  
21 OR preval\$.mp. OR incid\$.mp. OR statistic\$.mp. OR exp Epidemiologic Methods/]

1  
2  
3 Database: PsycINFO  
4

5 Search Terms: [exp Mental Disorders/ OR exp Psychiatric patients/ OR (mental adj3  
6 disorder\$).mp. OR (mental\$ adj3 ill\$).mp. OR (psychiatric\$ adj3 disorder\$).mp. OR  
7 (psychiatric\$ adj3 ill\$).mp. OR exp Drug Abuse/ OR exp Drug Addiction/ OR exp Drug  
8 Dependency/ OR exp Alcohol Abuse/ OR exp Addiction/ OR exp Dual Diagnosis/ OR  
9 (concurrent\$ adj3 disorder\$).mp. OR (dual\$ adj3 diag\$).mp. OR (alcohol\$ adj3  
10 abus\$).mp. OR (alcohol\$ adj3 depend\$).mp. OR 321\$.cc.[psychological disorders class  
11 code] OR 3233.cc.[Substance abuse & addic class code] OR (substance\$ adj3  
12 depend\$).mp. OR (drug\$ adj3 abus\$).mp. OR (drug\$ adj3 depend\$).mp. OR  
13 addiction\$.mp.] **AND** [exp Employee Absenteeism/ OR (absenteeism\$).mp. OR exp  
14 Employee Leave Benefits/ OR exp Reemployment/ OR exp Employee Turnover/ OR  
15 (social welfar\$).mp. OR exp Insurance/ OR exp Salaries/ OR exp employee benefits/  
16 OR exp Social Security/ OR exp Retirement/ OR (sick\$ adj3 day\$).mp. OR (illness\$  
17 adj3 leave\$).mp. OR (disabilit\$ adj3 leave\$).mp. OR (short term disabilit\$).mp. OR (long  
18 term disabilit\$).mp. OR (work\$ adj3 absence\$).mp. OR (return\$ to work\$).mp. OR  
19 (work\$ adj3 turnover\$).mp. OR (employ\$ adj3 turnover\$).mp. OR (disabilit\$  
20 benefit\$).mp. OR (employ\$ benefit\$).mp. OR (work\$ benefit\$).mp. OR (sick\$  
21 benefit\$).mp. OR (incapacit\$ benefit\$).mp. OR (social\$ welfar\$).mp. OR (public\$  
22 assistanc\$).mp. OR (insurance\$ disabilit\$).mp. OR (insurance\$ benefit\$).mp. OR (old\$  
23 age\$ assistanc\$).mp. OR (social\$ securit\$).mp. OR retire\$.mp.] **AND** [preval\$.mp. OR  
24 incid\$.mp. OR statistic\$.mp. OR exp Epidemiology/ OR ext Data collection/ OR  
25 epidemiolog\$.mp. OR (data collection\$).mp. OR survey\$.mp. OR questionnair\$.mp.]  
26  
27  
28  
29  
30  
31  
32  
33  
34  
35  
36  
37  
38  
39  
40  
41  
42  
43  
44  
45  
46  
47  
48  
49  
50  
51  
52  
53  
54  
55  
56  
57  
58  
59  
60



1  
2  
3  
4 Database: Econlit

5 Search Terms: [mental disorder\* OR mental disorder\* OR mental ill\* OR psychiatric\*  
6  
7  
8 OR concurrent\* disorder\* OR dual\* diag\* OR alcohol\* OR substance\* abus\* OR  
9  
10 substance\* depend\* OR drug\* abus\* OR drug\* depend\* OR addic\*] **AND** [absent\* OR  
11  
12 sick\* OR ill\* OR disabilit\* leav\* OR short term disabilit\* OR long term disabilit\* OR work\*  
13  
14 OR absence\* OR return\* to work\* OR work\* turnover\* OR employ\* OR benefit\* OR  
15  
16 welfar\* OR public\* assistanc\* OR insurance\* OR old\* age\* assistanc\* OR social securit\*  
17  
18 OR retire\*]  
19  
20  
21  
22  
23

24 Database: Web of Science

25  
26  
27 Search Terms: [mental disorder\* OR mental ill\* OR psychiatric\* disorder\* OR  
28  
29 psychiatric\* ill\* OR concurrent\* disorder\* OR dual\* diag\* OR alcohol\* abus\* OR alcohol\*  
30  
31 depend\* OR substance\* abus\* OR substance\* depend\* OR drug\* abus\* OR drug\*  
32  
33 depend\* OR addiction\*] **AND** [absenteeism\* OR sick\* day\* OR illness\* leave\* OR  
34  
35 disabilit\* leav\* OR short term disabilit\* OR long term disabilit\* OR work\* absence\* OR  
36  
37 return\* to work\* OR work\* turnover\* OR employ\* turnover\* OR disabilit\* benefit\* OR  
38  
39 employ\* benefit\* OR work\* benefit\* OR sick\* benefit\* OR incapacit\* benefit\* OR social\*  
40  
41 welfar\* OR public\* assistanc\* OR insurance\* disabilit\* OR insurance\* benefit\* OR old\*  
42  
43 age\* assistanc\* OR social securit\* OR retire\*] **AND** [preval\* OR incid\* OR statistic\* OR  
44  
45 epidemiolog\* OR data collection\* OR survey\* OR questionnair\*]  
46  
47  
48  
49  
50  
51  
52  
53  
54  
55  
56  
57  
58  
59  
60

### Quality Assessment Checklist

| Author(s)            | Year | 1  | 2  | 3 | 4  | 5 | 6 | 7 | 8  | 9 | 10 | Total |
|----------------------|------|----|----|---|----|---|---|---|----|---|----|-------|
| Barbosa-Branco et al | 2012 | 1  | 1  | 0 | 1  | 1 | 1 | 0 | 1  | 0 | 1  | 7     |
| Board & Brown        | 2011 | 1  | 1  | 0 | 1  | 1 | 1 | 1 | 1  | 0 | 1  | 8     |
| Dewa et al           | 2010 | 1  | 1  | 0 | 1  | 1 | 1 | 1 | 1  | 1 | 1  | 9     |
| Dewa et al           | 2011 | 1  | 1  | 0 | 1  | 1 | 1 | 1 | 1  | 1 | 1  | 9     |
| Koopmans et al       | 2008 | 1  | 1  | 0 | 1  | 0 | 0 | 0 | 1  | 1 | 1  | 6     |
| Koopmans et al       | 2010 | 1  | 1  | 0 | 1  | 1 | 1 | 0 | 1  | 1 | 1  | 8     |
| Koopmans et al       | 2011 | 1  | 1  | 0 | 1  | 1 | 1 | 1 | 1  | 1 | 1  | 9     |
| Reis et al           | 2011 | 1  | 1  | 0 | 1  | 1 | 0 | 0 | 1  | 0 | 1  | 6     |
| Roelen et al         | 2009 | 1  | 1  | 0 | 1  | 1 | 1 | 1 | 1  | 1 | 1  | 9     |
| Roelen et al         | 2010 | 1  | 1  | 0 | 1  | 1 | 1 | 1 | 1  | 1 | 1  | 9     |
| <b>Total</b>         |      | 10 | 10 | 0 | 10 | 9 | 8 | 6 | 10 | 7 | 10 |       |

### Quality Assessment Criteria

1. The study population is well described
2. The data source is well described
3. The study sample is representative of all workers in the context
4. Mental disorders are included and reported
5. The system of diagnosis/classification is described
6. The sickness absence criteria are reported (i.e., pre-sickness absence days to qualify for sickness absence)
7. Sickness absence outcome measures are defined
8. Analytical methods are described
9. Uncertainty of estimates are reported
10. The stated research objective is met

1  
2  
3  
4  
5  
6  
7  
8  
9  
10  
11  
12  
13  
14  
15  
16  
17  
18  
19  
20  
21  
22  
23  
24  
25  
26  
27  
28  
29  
30  
31  
32  
33  
34  
35  
36  
37  
38  
39  
40  
41  
42  
43  
44  
45  
46  
47  
48  
49  
50  
51  
52  
53  
54  
55  
56  
57  
58  
59  
60

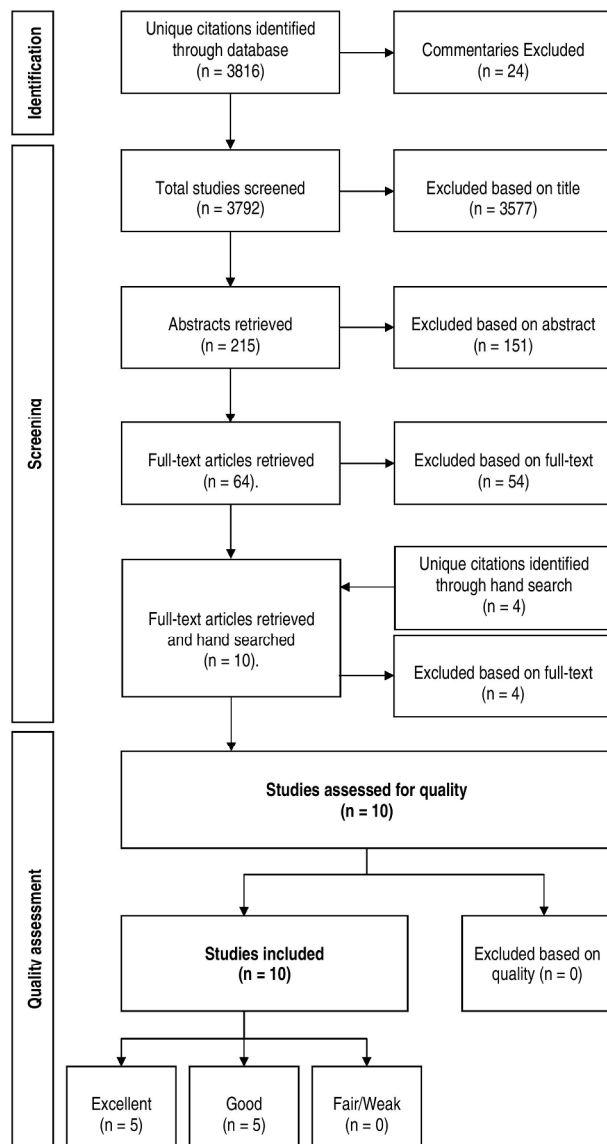

215x279mm (300 x 300 DPI)

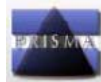

# PRISMA 2009 Checklist

| Section/topic                      | #  | Checklist item                                                                                                                                                                                                                                                                                              | Reported on page # |
|------------------------------------|----|-------------------------------------------------------------------------------------------------------------------------------------------------------------------------------------------------------------------------------------------------------------------------------------------------------------|--------------------|
| <b>TITLE</b>                       |    |                                                                                                                                                                                                                                                                                                             |                    |
| Title                              | 1  | Identify the report as a systematic review, meta-analysis, or both.                                                                                                                                                                                                                                         | 1                  |
| <b>ABSTRACT</b>                    |    |                                                                                                                                                                                                                                                                                                             |                    |
| Structured summary                 | 2  | Provide a structured summary including, as applicable: background; objectives; data sources; study eligibility criteria, participants, and interventions; study appraisal and synthesis methods; results; limitations; conclusions and implications of key findings; systematic review registration number. | 2-3                |
| <b>INTRODUCTION</b>                |    |                                                                                                                                                                                                                                                                                                             |                    |
| Rationale                          | 3  | Describe the rationale for the review in the context of what is already known.                                                                                                                                                                                                                              | 4-6                |
| Objectives                         | 4  | Provide an explicit statement of questions being addressed with reference to participants, interventions, comparisons, outcomes, and study design (PICOS).                                                                                                                                                  | 5-6                |
| <b>METHODS</b>                     |    |                                                                                                                                                                                                                                                                                                             |                    |
| Protocol and registration          | 5  | Indicate if a review protocol exists, if and where it can be accessed (e.g., Web address), and, if available, provide registration information including registration number.                                                                                                                               | N/A                |
| Eligibility criteria               | 6  | Specify study characteristics (e.g., PICOS, length of follow-up) and report characteristics (e.g., years considered, language, publication status) used as criteria for eligibility, giving rationale.                                                                                                      | 6-8                |
| Information sources                | 7  | Describe all information sources (e.g., databases with dates of coverage, contact with study authors to identify additional studies) in the search and date last searched.                                                                                                                                  | 6                  |
| Search                             | 8  | Present full electronic search strategy for at least one database, including any limits used, such that it could be repeated.                                                                                                                                                                               | Supp. File 1       |
| Study selection                    | 9  | State the process for selecting studies (i.e., screening, eligibility, included in systematic review, and, if applicable, included in the meta-analysis).                                                                                                                                                   | 6-8                |
| Data collection process            | 10 | Describe method of data extraction from reports (e.g., piloted forms, independently, in duplicate) and any processes for obtaining and confirming data from investigators.                                                                                                                                  | N/A                |
| Data items                         | 11 | List and define all variables for which data were sought (e.g., PICOS, funding sources) and any assumptions and simplifications made.                                                                                                                                                                       | 6-8                |
| Risk of bias in individual studies | 12 | Describe methods used for assessing risk of bias of individual studies (including specification of whether this was done at the study or outcome level), and how this information is to be used in any data synthesis.                                                                                      | 8                  |
| Summary measures                   | 13 | State the principal summary measures (e.g., risk ratio, difference in means).                                                                                                                                                                                                                               | N/A                |
| Synthesis of results               | 14 | Describe the methods of handling data and combining results of studies, if done, including measures of consistency (e.g., $I^2$ ) for each meta-analysis.                                                                                                                                                   | N/A                |

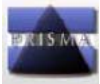

# PRISMA 2009 Checklist

| Section/topic                 | #  | Checklist item                                                                                                                                                                                           | Reported on page # |
|-------------------------------|----|----------------------------------------------------------------------------------------------------------------------------------------------------------------------------------------------------------|--------------------|
| Risk of bias across studies   | 15 | Specify any assessment of risk of bias that may affect the cumulative evidence (e.g., publication bias, selective reporting within studies).                                                             | 8                  |
| Additional analyses           | 16 | Describe methods of additional analyses (e.g., sensitivity or subgroup analyses, meta-regression), if done, indicating which were pre-specified.                                                         | N/A                |
| <b>RESULTS</b>                |    |                                                                                                                                                                                                          |                    |
| Study selection               | 17 | Give numbers of studies screened, assessed for eligibility, and included in the review, with reasons for exclusions at each stage, ideally with a flow diagram.                                          | 8-9, Figure 1      |
| Study characteristics         | 18 | For each study, present characteristics for which data were extracted (e.g., study size, PICOS, follow-up period) and provide the citations.                                                             | 9-10, Table 1      |
| Risk of bias within studies   | 19 | Present data on risk of bias of each study and, if available, any outcome level assessment (see item 12).                                                                                                | Supp. File 2       |
| Results of individual studies | 20 | For all outcomes considered (benefits or harms), present, for each study: (a) simple summary data for each intervention group (b) effect estimates and confidence intervals, ideally with a forest plot. | 12-19, Table 2-3   |
| Synthesis of results          | 21 | Present results of each meta-analysis done, including confidence intervals and measures of consistency.                                                                                                  | N/A                |
| Risk of bias across studies   | 22 | Present results of any assessment of risk of bias across studies (see Item 15).                                                                                                                          | N/A                |
| Additional analysis           | 23 | Give results of additional analyses, if done (e.g., sensitivity or subgroup analyses, meta-regression [see Item 16]).                                                                                    | N/A                |
| <b>DISCUSSION</b>             |    |                                                                                                                                                                                                          |                    |
| Summary of evidence           | 24 | Summarize the main findings including the strength of evidence for each main outcome; consider their relevance to key groups (e.g., healthcare providers, users, and policy makers).                     | 20-23              |
| Limitations                   | 25 | Discuss limitations at study and outcome level (e.g., risk of bias), and at review-level (e.g., incomplete retrieval of identified research, reporting bias).                                            | 23-25              |
| Conclusions                   | 26 | Provide a general interpretation of the results in the context of other evidence, and implications for future research.                                                                                  | 25-26              |
| <b>FUNDING</b>                |    |                                                                                                                                                                                                          |                    |
| Funding                       | 27 | Describe sources of funding for the systematic review and other support (e.g., supply of data); role of funders for the systematic review.                                                               | 26                 |

From: Moher D, Liberati A, Tetzlaff J, Altman DG, The PRISMA Group (2009). Preferred Reporting Items for Systematic Reviews and Meta-Analyses: The PRISMA Statement. PLoS Med 6(6): e1000097. doi:10.1371/journal.pmed1000097

For more information, visit: [www.prisma-statement.org](http://www.prisma-statement.org).
